# Supplementary material for: Phenotypic and genotypic characterization of ST103 Serotype Ia Streptococcus agalactiae isolated from bovine mastitis in China
Source: Research Square preprint supplement (doi:10.21203/rs.3.rs-6746409/v1), 2025-07-10
Supplement: Supplementary file 1 [file 1b93fbdbb486752b5def3cb5.xlsx]

## Sheet: Sheet2
	Assembly statistics			Quality control						Annotation
Isolate	Contigs	Largest contig	Total length	GC (%)	N50	N75	L50	L75	N's per 100 kbp	CDS	rRNA	tRNA	tmRNA	Repeat region	Prophage regions
C04	14	946798	2113968	35.52	321963	214210	2	4	17.83	2099	3	50	1	1	0
C05	14	946798	2114668	35.52	321964	214210	2	4	18.06	2101	3	49	1	1	0
C06	11	1173714	2112478	35.52	1173714	534145	1	2	18.04	2094	3	49	1	1	0
C07	8	1665667	2069980	35.49	1665667	1665667	1	1	14.01	2026	3	51	1	1	0
C11	12	1173685	2111828	35.52	1173685	259797	1	3	13.59	2094	3	50	1	1	0
C23	13	1173419	2112298	35.52	1173419	259797	1	3	13.54	2094	3	50	1	1	0
C24	9	1707950	2113017	35.52	1707950	1707950	1	1	22.62	2096	3	49	1	2	0
C28	14	750078	2107193	35.67	552030	364351	2	3	0	2038	9	55	1	1	0
C35	23	688813	2157016	35.67	257631	214541	3	5	0	2114	9	55	1	1	0
C50	14	946799	2114669	35.52	321964	214210	2	4	18.11	2100	3	49	1	1	0
C60	12	915634	2112521	35.52	534484	257656	2	3	0	2094	5	51	1	1	0
A03	25	765770	2111896	35.48	551302	161381	2	4	0	2080	5	51	1	1	0
A14	25	767752	2114231	35.48	551986	161381	2	4	0	2079	5	51	1	1	0
A16	25	765770	2112365	35.48	551518	161381	2	4	0	2081	5	51	1	1	0
A18	10	765907	2091099	35.47	551451	408057	2	3	0	2045	5	51	1	1	0
B02	39	432071	2185386	35.46	116503	66160	4	10	0	2173	6	50	1	1	1
B03	39	511841	2184936	35.46	241004	89320	3	8	0	2173	6	50	1	1	1
B09	40	430070	2184901	35.46	144024	70049	4	10	0	2173	6	50	1	1	1
B14	36	511841	2186095	35.46	241005	89322	3	7	0	2174	6	50	1	1	1
B15	38	393825	2184129	35.46	172663	89320	4	9	0	2169	6	50	1	1	1
B16	33	511842	2186412	35.46	241005	70049	3	8	0	2171	6	50	1	1	1
B18	34	430206	2186837	35.47	225200	89320	4	8	0	2175	6	51	1	1	1
B19	25	511682	2146012	35.44	241005	89320	3	8	0	2115	6	49	1	1	1
B22	22	561023	2146782	35.44	241005	91407	3	6	0	2116	6	49	1	1	1
B24	35	511841	2185884	35.46	241005	89320	3	7	0	2175	6	50	1	1	1
B39	35	511717	2185336	35.46	241005	89320	3	7	0	2173	6	50	1	1	1
B50	39	511842	2185149	35.46	116503	70051	4	9	0	2174	6	50	1	1	1
