# Supplementary material for: Phenotypic and genotypic characterization of ST103 Serotype Ia Streptococcus agalactiae isolated from bovine mastitis in China
Source: Research Square preprint supplement (doi:10.21203/rs.3.rs-6746409/v1), 2025-07-10
Supplement: Supplementary file 2 [file 7f4f2b460d273c43c87c23a0.xlsx]

## Sheet: Sheet1
	MIC													Antimicrobial resistance gene
Classification	Macrolides				Tetracyclines		β lactams				Link amines	Broad spectrum	Glycopeptides	Erythromycin	Multidrug	Tetracycline	Tetracycline
ID anti	Erythromycin	Azithromycin	Tylosin	Tilmicosin	Tetracycline	Oxytetracycline	Ceftiofur	Penicillin G sodium	Ampicillin	Amoxicillin	Clindamycin	Enrofloxacin	Vancomycin	ermB	Streptococcus_agalactiae_mprF	tetM	tetO
ATCC29213	0.5	1	2	2	0.5	0.5	1	2	2	1	0.25	0.125	2
ATCC13813	＜0.03215	0.0625	1	4	0.25	0.25	＜0.125	0.0625	0.0625	0.0625	＜0.03215	0.5	0.5
C04	＞64	＞64	＞64	＞64	32	32	1	0.0625	0.125	0.0625	＜0.03215	0.5	2	1	1	0	1
C05	＞64	＞64	＞64	＞64	32	32	1	0.0625	0.125	0.0625	＜0.03215	1	2	1	1	0	1
C06	＜0.03215	0.125	0.5	8	32	32	0.25	0.0625	0.125	0.0625	＜0.03215	1	2	0	1	0	1
C07	0.125	0.125	1	8	32	32	1	0.0625	0.125	0.0625	＜0.03215	2	2	0	1	0	1
C11	＜0.03215	0.125	1	8	32	32	＜0.125	0.0625	0.125	0.0625	＜0.03215	1	1	0	1	0	1
C23	0.0625	0.25	1	8	32	32	1	0.0625	0.125	0.0625	0.0625	1	2	0	1	0	1
C24	0.0625	0.125	0.25	8	32	32	0.25	0.0625	0.0625	0.0625	0.0625	0.5	0.25	0	1	0	1
C28	0.125	0.125	1	4	16	32	＜0.125	0.0625	0.125	0.125	＜0.03215	0.5	0.5	0	1	0	1
C35	0.125	＞64	＞64	＞64	32	32	＜0.125	0.125	0.125	0.0625	0.0625	0.5	0.5	1	1	0	1
C50	32	＞64	＞64	＞64	32	32	1	0.0625	0.125	0.0625	＜0.03215	0.5	2	1	1	0	1
C60	0.125	0.125	1	8	32	32	1	0.125	0.125	0.0625	＜0.03215	0.5	0.5	0	1	0	1
A03	＜0.03215	0.0625	1	4	8	32	1	0.125	0.125	0.0625	＜0.03215	4	0.5	0	1	1	0
A14	0.0625	＜0.03215	＜0.03215	8	8	16	1	＜0.03215	4	0.0625	1	16	2	0	1	1	0
A16	0.0625	0.0625	1	4	8	32	1	0.125	0.125	0.0625	＜0.03215	4	1	0	1	1	0
A18	0.125	0.0625	1	8	8	32	＜0.125	0.0625	0.125	0.0625	＜0.03215	4	1	0	1	1	0
B02	＜0.03215	0.125	0.5	8	1	4	1	0.0625	0.125	0.0625	＜0.03215	1	2	0	1	0	0
B03	＜0.03215	0.125	0.5	8	1	2	1	＜0.03215	0.0625	0.0625	＜0.03215	1	2	0	1	0	0
B09	＜0.03215	0.0625	1	8	1	4	＜0.125	0.0625	0.125	＜0.03215	＜0.03215	1	1	0	1	0	0
B14	＜0.03215	0.125	0.5	8	1	4	＜0.125	0.0625	0.125	0.0625	＜0.03215	1	1	0	1	0	0
B15	＜0.03215	0.0625	1	16	1	2	＜0.125	0.0625	0.125	0.0625	＜0.03215	1	1	0	1	0	0
B16	＜0.03215	0.125	0.5	8	1	4	＜0.125	0.0625	0.0625	0.0625	＜0.03215	1	0.5	0	1	0	0
B18	＜0.03215	0.125	1	8	1	4	＜0.125	0.0625	0.125	0.0625	＜0.03215	1	1	0	1	0	0
B19	＜0.03215	0.25	1	8	1	2	＜0.125	0.0625	0.0625	0.0625	＜0.03215	0.5	1	0	1	0	0
B22	0.0625	0.125	1	8	2	2	＜0.125	0.125	0.125	0.0625	0.0625	1	1	0	1	0	0
B24	＜0.03215	0.125	1	8	1	1	＜0.125	0.0625	0.125	0.0625	＜0.03215	1	0.5	0	1	0	0
B39	＜0.03215	0.125	1	4	1	1	＜0.125	0.0625	0.125	0.0625	＜0.03215	2	1	0	1	0	0
B50	＜0.03215	0.0625	1	4	1	2	＜0.125	0.0625	0.0625	0.0625	＜0.03215	1	0.5	0	1	0	0
