# Supplementary material for: Phenotypic and genotypic characterization of ST103 Serotype Ia Streptococcus agalactiae isolated from bovine mastitis in China
Source: Research Square preprint supplement (doi:10.21203/rs.3.rs-6746409/v1), 2025-07-10
Supplement: Supplementary file 3 [file ded4a11b9bfb5ed8851162ba.xlsx]

## Sheet: Sheet1
Gene	LDH_correlation coefficient	Gene	P_Value	Gene	adhesion_correlation coefficient	Gene	adhesion_P_Value	Gene	invasion_correlation coefficient	Gene	invasion_P_Value	Gene	correlation_Mortality_rate_12 h	Gene	P_Value_Mortality_rate_12 h	Gene	correlation_Mortality_rate_18 h	Gene	P_Value_Mortality_rate_18 h	Gene	correlation_Mortality_rate_24 h	Gene	P_Value_Mortality_rate_24 h	Gene	correlation_Mortality_rate_36 h	Gene	P_Value_Mortality_rate_36 h	Gene	correlation_Mortality_rate_48 h	Gene	P_Value_Mortality_rate_48 h	Gene	correlation_Mortality_rate_60 h	Gene	P_Value_Mortality_rate_60 h
group_153	0.03879	group_153	0.730987	group_153	-0.0230408	group_262	4.87e-12	group_153	-0.00317943	group_73	5.9e-15	group_153	0.13746	aadK_1	0.443209	aadK_1	0.471304	aadK_1	0.0130811	aadK_1	0.630351	aadK_1	0.000424718	aadK_1	0.544589	aadK_1	0.00331401	aadK_1	0.139573	aadK_1	0.487473	aadK_1	-0.0325128	aadK_1	0.872102
group_155	0.03879	group_155	0.730987	group_155	-0.0230408	lacD_1	4.87e-12	group_155	-0.00317943	soj	5.9e-15	group_155	0.13746	adhA_2	0.443209	adhA_2	0.471304	adhA_2	0.0130811	adhA_2	0.630351	adhA_2	0.000424718	adhA_2	0.544589	adhA_2	0.00331401	adhA_2	0.139573	adhA_2	0.487473	adhA_2	-0.0325128	adhA_2	0.872102
group_206	-0.000799396	group_206	0.994349	group_206	-0.21083	group_7	7.37e-07	group_206	-0.357191	group_215	5.9e-15	group_206	-0.148034	bcrA	0.173358	bcrA	0.289418	bcrA	0.143126	bcrA	0.389773	bcrA	0.0444555	bcrA	0.458131	bcrA	0.0162548	bcrA	0.10351	bcrA	0.607402	bcrA	-0.0241121	bcrA	0.904975
ulaE	0.123624	ulaE	0.271528	ulaE	0.103403	group_128	1.44e-06	ulaE	0.0707194	group_216	5.9e-15	ulaE	-0.148034	bin3	0.443209	bin3	0.471304	bin3	0.0130811	bin3	0.630351	bin3	0.000424718	bin3	0.544589	bin3	0.00331401	bin3	0.139573	bin3	0.487473	bin3	-0.0325128	bin3	0.872102
group_261	-0.0208826	group_261	0.853196	group_261	0.172569	nisC	1.44e-06	group_261	0.252843	group_217	5.9e-15	group_261	0.422955	cadC	0.173358	cadC	-0.289418	cadC	0.143126	cadC	-0.389773	cadC	0.0444555	cadC	-0.458131	cadC	0.0162548	cadC	-0.10351	cadC	0.607402	cadC	0.0241121	cadC	0.904975
group_300	0.03879	group_300	0.730987	group_300	-0.0230408	group_143	1.44e-06	group_300	-0.00317943	group_218	5.9e-15	group_300	0.13746	clpE_2	0.412082	clpE_2	-0.247048	clpE_2	0.214119	clpE_2	-0.326659	clpE_2	0.0963063	clpE_2	-0.112423	clpE_2	0.576638	clpE_2	-0.0482617	clpE_2	0.811068	clpE_2	0.0112423	clpE_2	0.955617
group_301	0.03879	group_301	0.730987	group_301	-0.0230408	group_144	1.44e-06	group_301	-0.00317943	aadK_1	5.9e-15	group_301	0.13746	clpP_3	0.358448	clpP_3	-0.0332165	clpP_3	0.869357	clpP_3	0.0161029	clpP_3	0.936461	clpP_3	-0.19112	clpP_3	0.339609	clpP_3	0.0482617	clpP_3	0.811068	clpP_3	0.140529	clpP_3	0.484464
group_305	0.03879	group_305	0.730987	group_305	-0.0230408	group_145	1.44e-06	group_305	-0.00317943	group_220	5.9e-15	group_305	0.13746	creC	0.173358	creC	0.289418	creC	0.143126	creC	0.389773	creC	0.0444555	creC	0.458131	creC	0.0162548	creC	0.10351	creC	0.607402	creC	-0.0241121	creC	0.904975
group_306	0.03879	group_306	0.730987	group_306	-0.0230408	group_146	1.44e-06	group_306	-0.00317943	group_221	5.9e-15	group_306	0.13746	cynR	0.407687	cynR	-0.512048	cynR	0.00632544	cynR	-0.631531	cynR	0.000411134	cynR	-0.482243	cynR	0.010853	cynR	-0.10351	cynR	0.607402	cynR	0.0843925	cynR	0.675571
ulaD	0.123624	ulaD	0.271528	ulaD	0.103403	group_204	1.44e-06	ulaD	0.0707194	group_222	5.9e-15	ulaD	-0.148034	deoB_1	0.320887	deoB_1	0.196909	deoB_1	0.324901	deoB_1	0.153324	deoB_1	0.44515	deoB_1	0.57639	deoB_1	0.00165094	deoB_1	0.123718	deoB_1	0.538682	deoB_1	0.115278	deoB_1	0.566934
group_90	0.03879	group_90	0.730987	group_90	-0.0230408	group_209	1.44e-06	group_90	-0.00317943	group_223	5.9e-15	group_90	0.13746	deoB_2	0.320887	deoB_2	0.00532186	deoB_2	0.978982	deoB_2	-0.00589706	deoB_2	0.976711	deoB_2	0.317015	deoB_2	0.10714	deoB_2	0.123718	deoB_2	0.538682	deoB_2	0.115278	deoB_2	0.566934
group_91	0.0181296	group_91	0.872374	group_91	-0.133138	group_210	1.44e-06	group_91	0.0731509	group_224	5.9e-15	group_91	-0.148034	dexB_1	0.173358	dexB_1	-0.289418	dexB_1	0.143126	dexB_1	-0.389773	dexB_1	0.0444555	dexB_1	-0.458131	dexB_1	0.0162548	dexB_1	-0.10351	dexB_1	0.607402	dexB_1	0.0241121	dexB_1	0.904975
group_105	-0.368619	group_105	0.000708996	group_105	-0.42659	group_225	1.44e-06	group_105	-0.320233	group_271	5.9e-15	group_105	-0.00762493	dinB_2	0.173358	dinB_2	-0.289418	dinB_2	0.143126	dinB_2	-0.389773	dinB_2	0.0444555	dinB_2	-0.458131	dinB_2	0.0162548	dinB_2	-0.10351	dinB_2	0.607402	dinB_2	0.0241121	dinB_2	0.904975
group_183	-0.368619	group_183	0.000708996	group_183	-0.42659	group_226	1.44e-06	group_183	-0.320233	bin3	5.9e-15	group_183	-0.00762493	dnaG_1	0.173358	dnaG_1	-0.289418	dnaG_1	0.143126	dnaG_1	-0.389773	dnaG_1	0.0444555	dnaG_1	-0.458131	dnaG_1	0.0162548	dnaG_1	-0.10351	dnaG_1	0.607402	dnaG_1	0.0241121	dnaG_1	0.904975
group_104	0.0688628	group_104	0.541294	group_104	-0.115336	group_227	1.44e-06	group_104	0.0175997	group_273	5.9e-15	group_104	0.140529	erm	0.631	erm	0.145322	erm	0.469534	erm	0.356564	erm	0.0679063	erm	0.292301	erm	0.139006	erm	0.0965234	erm	0.631982	erm	0.0112423	erm	0.955617
group_141	0.220296	group_141	0.0481319	group_141	-0.347351	pezA	1.44e-06	group_141	0.203133	tet.O.	5.9e-15	group_141	-0.0112423	fic	0.173358	fic	-0.289418	fic	0.143126	fic	-0.389773	fic	0.0444555	fic	-0.458131	fic	0.0162548	fic	-0.10351	fic	0.607402	fic	0.0241121	fic	0.904975
group_142	0.220296	group_142	0.0481319	group_142	-0.347351	pezT	1.44e-06	group_142	0.203133	group_275	5.9e-15	group_142	-0.0112423	fruA_4	0.526363	fruA_4	0.0156207	fruA_4	0.93836	fruA_4	0.0216363	fruA_4	0.914695	fruA_4	0.0422955	fruA_4	0.834083	fruA_4	0.181568	fruA_4	0.364735	fruA_4	0.148034	fruA_4	0.461192
group_185	0.0688628	group_185	0.541294	group_185	-0.115336	group_230	1.44e-06	group_185	0.0175997	group_276	5.9e-15	group_185	0.140529	glnB	0.173358	glnB	0.289418	glnB	0.143126	glnB	0.389773	glnB	0.0444555	glnB	0.458131	glnB	0.0162548	glnB	0.10351	glnB	0.607402	glnB	-0.0241121	glnB	0.904975
group_186	0.0688628	group_186	0.541294	group_186	-0.115336	group_231	1.44e-06	group_186	0.0175997	group_277	5.9e-15	group_186	0.140529	graR_1	0.316474	graR_1	0.121061	graR_1	0.547506	graR_1	0.0216363	graR_1	0.914695	graR_1	0.0422955	graR_1	0.834083	graR_1	0.181568	graR_1	0.364735	graR_1	0.148034	graR_1	0.461192
group_188	0.0688628	group_188	0.541294	group_188	-0.115336	group_232	1.44e-06	group_188	0.0175997	group_278	5.9e-15	group_188	0.140529	group_10	0.212538	group_10	-0.0892337	group_10	0.658043	group_10	-0.223002	group_10	0.263535	group_10	0.174785	group_10	0.383223	group_10	-0.0441367	group_10	0.826965	group_10	-0.0822516	group_10	0.683376
clpP_3	0.0688628	clpP_3	0.541294	clpP_3	-0.115336	group_233	1.44e-06	clpP_3	0.0175997	group_279	5.9e-15	clpP_3	0.140529	group_100	0.173358	group_100	-0.289418	group_100	0.143126	group_100	-0.389773	group_100	0.0444555	group_100	-0.458131	group_100	0.0162548	group_100	-0.10351	group_100	0.607402	group_100	0.0241121	group_100	0.904975
group_190	0.0688628	group_190	0.541294	group_190	-0.115336	group_234	1.44e-06	group_190	0.0175997	group_292	5.9e-15	group_190	0.140529	group_101	0.744914	group_101	0.25063	group_101	0.207335	group_101	0.283959	group_101	0.151167	group_101	0.198248	group_101	0.321555	group_101	0.0654654	group_101	0.74562	group_101	0.00762493	group_101	0.96989
group_191	0.0688628	group_191	0.541294	group_191	-0.115336	regX3	1.44e-06	group_191	0.0175997	group_293	5.9e-15	group_191	0.140529	group_102	0.526363	group_102	0.2265	group_102	0.255923	group_102	0.138472	group_102	0.490945	group_102	0.232625	group_102	0.242942	group_102	0.181568	group_102	0.364735	group_102	0.148034	group_102	0.461192
group_192	0.0688628	group_192	0.541294	group_192	-0.115336	creC	1.44e-06	group_192	0.0175997	group_307	5.9e-15	group_192	0.140529	group_103	0.173358	group_103	-0.289418	group_103	0.143126	group_103	-0.389773	group_103	0.0444555	group_103	-0.458131	group_103	0.0162548	group_103	-0.10351	group_103	0.607402	group_103	0.0241121	group_103	0.904975
group_193	0.0688628	group_193	0.541294	group_193	-0.115336	bcrA	1.44e-06	group_193	0.0175997	group_308	5.9e-15	group_193	0.140529	group_104	0.358448	group_104	-0.0332165	group_104	0.869357	group_104	0.0161029	group_104	0.936461	group_104	-0.19112	group_104	0.339609	group_104	0.0482617	group_104	0.811068	group_104	0.140529	group_104	0.484464
group_195	0.0688628	group_195	0.541294	group_195	-0.115336	group_238	1.44e-06	group_195	0.0175997	group_309	5.9e-15	group_195	0.140529	group_105	0.358692	group_105	-0.326663	group_105	0.0963013	group_105	-0.199708	group_105	0.317932	group_105	-0.198248	group_105	0.321555	group_105	-0.0654654	group_105	0.74562	group_105	-0.00762493	group_105	0.96989
group_196	0.0688628	group_196	0.541294	group_196	-0.115336	group_239	1.44e-06	group_196	0.0175997	group_310	5.9e-15	group_196	0.140529	group_106	0.45369	group_106	0.115814	group_106	0.56512	group_106	0.117813	group_106	0.55838	group_106	-0.0102815	group_106	0.959407	group_106	0.220684	group_106	0.26866	group_106	0.056548	group_106	0.779361
group_324	0.220296	group_324	0.0481319	group_324	-0.347351	nisI	1.44e-06	group_324	0.203133	group_311	5.9e-15	group_324	-0.0112423	group_107	0.0613835	group_107	0.116605	group_107	0.562447	group_107	0.28295	group_107	0.152688	group_107	0.351696	group_107	0.0720243	group_107	0.0686264	group_107	0.733766	group_107	-0.0279758	group_107	0.889833
group_325	0.220296	group_325	0.0481319	group_325	-0.347351	group_241	1.44e-06	group_325	0.203133	group_312	5.9e-15	group_325	-0.0112423	group_12	0.173358	group_12	-0.289418	group_12	0.143126	group_12	-0.389773	group_12	0.0444555	group_12	-0.458131	group_12	0.0162548	group_12	-0.10351	group_12	0.607402	group_12	0.0241121	group_12	0.904975
group_408	0.0688628	group_408	0.541294	group_408	-0.115336	group_242	1.44e-06	group_408	0.0175997	group_313	5.9e-15	group_408	0.140529	group_128	0.173358	group_128	0.289418	group_128	0.143126	group_128	0.389773	group_128	0.0444555	group_128	0.458131	group_128	0.0162548	group_128	0.10351	group_128	0.607402	group_128	-0.0241121	group_128	0.904975
group_9	0.220296	group_9	0.0481319	group_9	-0.347351	group_264	1.44e-06	group_9	0.203133	group_314	5.9e-15	group_9	-0.0112423	group_141	0.412082	group_141	0.247048	group_141	0.214119	group_141	0.326659	group_141	0.0963063	group_141	0.112423	group_141	0.576638	group_141	0.0482617	group_141	0.811068	group_141	-0.0112423	group_141	0.955617
group_10	0.330086	group_10	0.00261737	group_10	0.157544	group_265	1.44e-06	group_10	0.0650635	group_315	5.9e-15	group_10	-0.0822516	group_142	0.412082	group_142	0.247048	group_142	0.214119	group_142	0.326659	group_142	0.0963063	group_142	0.112423	group_142	0.576638	group_142	0.0482617	group_142	0.811068	group_142	-0.0112423	group_142	0.955617
group_106	0.000918614	group_106	0.993506	group_106	-0.113965	lacX_2	1.44e-06	group_106	0.0582312	group_316	5.9e-15	group_106	0.056548	group_143	0.173358	group_143	0.289418	group_143	0.143126	group_143	0.389773	group_143	0.0444555	group_143	0.458131	group_143	0.0162548	group_143	0.10351	group_143	0.607402	group_143	-0.0241121	group_143	0.904975
group_165	-0.272826	group_165	0.0137315	group_165	-0.0255445	group_267	1.44e-06	group_165	-0.316301	group_317	5.9e-15	group_165	-0.0144098	group_144	0.173358	group_144	0.289418	group_144	0.143126	group_144	0.389773	group_144	0.0444555	group_144	0.458131	group_144	0.0162548	group_144	0.10351	group_144	0.607402	group_144	-0.0241121	group_144	0.904975
group_205	0.151915	group_205	0.175782	group_205	0.0681741	group_268	1.44e-06	group_205	0.330391	group_318	5.9e-15	group_205	0.244966	group_145	0.173358	group_145	0.289418	group_145	0.143126	group_145	0.389773	group_145	0.0444555	group_145	0.458131	group_145	0.0162548	group_145	0.10351	group_145	0.607402	group_145	-0.0241121	group_145	0.904975
deoB_1	0.36945	deoB_1	0.000688033	deoB_1	0.372511	group_269	1.44e-06	deoB_1	0.298295	group_319	5.9e-15	deoB_1	0.115278	group_146	0.173358	group_146	0.289418	group_146	0.143126	group_146	0.389773	group_146	0.0444555	group_146	0.458131	group_146	0.0162548	group_146	0.10351	group_146	0.607402	group_146	-0.0241121	group_146	0.904975
deoB_2	0.19386	deoB_2	0.0828984	deoB_2	0.312617	ltrA	1.44e-06	deoB_2	0.308871	group_320	5.9e-15	deoB_2	0.115278	group_152	0.107641	group_152	0.321772	group_152	0.101688	group_152	0.511927	group_152	0.00633983	group_152	0.43962	group_152	0.0217626	group_152	0.137253	group_152	0.494809	group_152	0.0279758	group_152	0.889833
group_27	0.0883166	group_27	0.433023	group_27	-0.0634235	group_281	1.44e-06	group_27	0.22284	group_321	5.9e-15	group_27	0.244966	group_153	0.526363	group_153	0.0898191	group_153	0.655935	group_153	0.328872	group_153	0.0939406	group_153	-0.0422955	group_153	0.834083	group_153	0.0907841	group_153	0.652466	group_153	0.13746	group_153	0.49415
group_298	0.00862194	group_298	0.939107	group_298	-0.0517141	group_282	1.44e-06	group_298	-0.169893	group_322	5.9e-15	group_298	0.244966	group_154	0.173358	group_154	-0.289418	group_154	0.143126	group_154	-0.389773	group_154	0.0444555	group_154	-0.458131	group_154	0.0162548	group_154	-0.10351	group_154	0.607402	group_154	0.0241121	group_154	0.904975
group_30	0.479292	group_30	5.98818e-06	group_30	-0.126636	group_283	1.44e-06	group_30	0.390343	group_323	5.9e-15	group_30	0.115278	group_155	0.526363	group_155	0.0898191	group_155	0.655935	group_155	0.328872	group_155	0.0939406	group_155	-0.0422955	group_155	0.834083	group_155	0.0907841	group_155	0.652466	group_155	0.13746	group_155	0.49415
group_336	0.479292	group_336	5.98818e-06	group_336	-0.126636	group_284	1.44e-06	group_336	0.390343	group_339	5.9e-15	group_336	0.115278	group_156	0.107641	group_156	0.321772	group_156	0.101688	group_156	0.511927	group_156	0.00633983	group_156	0.43962	group_156	0.0217626	group_156	0.137253	group_156	0.494809	group_156	0.0279758	group_156	0.889833
group_337	0.479292	group_337	5.98818e-06	group_337	-0.126636	group_285	1.44e-06	group_337	0.390343	group_340	5.9e-15	group_337	0.115278	group_157	0.107641	group_157	0.321772	group_157	0.101688	group_157	0.511927	group_157	0.00633983	group_157	0.43962	group_157	0.0217626	group_157	0.137253	group_157	0.494809	group_157	0.0279758	group_157	0.889833
group_338	0.479292	group_338	5.98818e-06	group_338	-0.126636	group_286	1.44e-06	group_338	0.390343	group_341	5.9e-15	group_338	0.115278	group_16	0.804976	group_16	0.268792	group_16	0.175195	group_16	0.372304	group_16	0.0558242	group_16	0.20676	group_16	0.300784	group_16	-0.0710072	group_16	0.724876	group_16	-0.132326	group_16	0.510567
xerC_4	0.479292	xerC_4	5.98818e-06	xerC_4	-0.126636	group_287	1.44e-06	xerC_4	0.390343	group_342	5.9e-15	xerC_4	0.115278	group_164	0.107641	group_164	0.321772	group_164	0.101688	group_164	0.511927	group_164	0.00633983	group_164	0.43962	group_164	0.0217626	group_164	0.137253	group_164	0.494809	group_164	0.0279758	group_164	0.889833
hsdR	0.259031	hsdR	0.0195408	hsdR	0.372804	group_288	1.44e-06	hsdR	0.407945	group_343	5.9e-15	hsdR	0.115278	group_165	0.90222	group_165	-0.329955	group_165	0.0927985	group_165	-0.430486	group_165	0.0249948	group_165	-0.374654	group_165	0.0541751	group_165	-0.123718	group_165	0.538682	group_165	-0.0144098	group_165	0.94313
group_80	0.479292	group_80	5.98818e-06	group_80	-0.126636	group_289	1.44e-06	group_80	0.390343	group_38	5.9e-15	group_80	0.115278	group_166	0.197347	group_166	-0.356942	group_166	0.0675942	group_166	-0.554804	group_166	0.00266919	group_166	-0.454812	group_166	0.0171471	group_166	-0.150188	group_166	0.454624	group_166	-0.0174928	group_166	0.930989
group_89	0.479292	group_89	5.98818e-06	group_89	-0.126636	group_290	1.44e-06	group_89	0.390343	group_71	5.9e-15	group_89	0.115278	group_167	0.606365	group_167	-0.431901	group_167	0.0244699	group_167	-0.498318	group_167	0.00815896	group_167	-0.554579	group_167	0.00268213	group_167	-0.10351	group_167	0.607402	group_167	0.0843925	group_167	0.675571
group_5	-0.14616	group_5	0.192915	group_5	-0.251097	group_291	1.44e-06	group_5	-0.138381	adhA_2	5.9e-15	group_5	0.0455677	group_168	0.173358	group_168	-0.289418	group_168	0.143126	group_168	-0.389773	group_168	0.0444555	group_168	-0.458131	group_168	0.0162548	group_168	-0.10351	group_168	0.607402	group_168	0.0241121	group_168	0.904975
group_166	-0.26214	group_166	0.0180744	group_166	-0.309695	group_294	1.44e-06	group_166	-0.499683	group_167	1.42e-14	group_166	-0.0174928	group_169	0.223699	group_169	-0.145086	group_169	0.470263	group_169	-0.28092	group_169	0.155781	group_169	-0.504494	group_169	0.00728544	group_169	-0.0355036	group_169	0.860445	group_169	0.132326	group_169	0.510567
group_2	-0.26214	group_2	0.0180744	group_2	-0.309695	group_295	1.44e-06	group_2	-0.499683	xerD	1.42e-14	group_2	-0.0174928	group_17	0.856887	group_17	-0.300699	group_17	0.127493	group_17	-0.212036	group_17	0.288341	group_17	-0.338364	group_17	0.0842872	group_17	-0.363137	group_17	0.0626374	group_17	0.148034	group_17	0.461192
group_2447	0.463214	group_2447	1.33336e-05	group_2447	-0.0833132	group_296	1.44e-06	group_2447	0.544589	cynR	4.06e-11	group_2447	0.21866	group_170	0.0613835	group_170	0.116605	group_170	0.562447	group_170	0.28295	group_170	0.152688	group_170	0.351696	group_170	0.0720243	group_170	0.0686264	group_170	0.733766	group_170	-0.0279758	group_170	0.889833
group_28	0.122658	group_28	0.275321	group_28	0.343119	group_297	1.44e-06	group_28	0.236949	group_211	5.96e-10	group_28	-0.190623	group_171	0.0613835	group_171	0.116605	group_171	0.562447	group_171	0.28295	group_171	0.152688	group_171	0.351696	group_171	0.0720243	group_171	0.0686264	group_171	0.733766	group_171	-0.0279758	group_171	0.889833
group_16	0.332794	group_16	0.00240039	group_16	-0.0123083	group_345	1.44e-06	group_16	0.462567	erm	5.96e-10	group_16	-0.132326	group_172	0.0613835	group_172	0.116605	group_172	0.562447	group_172	0.28295	group_172	0.152688	group_172	0.351696	group_172	0.0720243	group_172	0.0686264	group_172	0.733766	group_172	-0.0279758	group_172	0.889833
group_262	-0.164992	group_262	0.141033	group_262	-0.674918	group_42	1.44e-06	group_262	-0.13844	group_213	5.96e-10	group_262	0.0325128	group_173	0.0613835	group_173	0.116605	group_173	0.562447	group_173	0.28295	group_173	0.152688	group_173	0.351696	group_173	0.0720243	group_173	0.0686264	group_173	0.733766	group_173	-0.0279758	group_173	0.889833
group_353	-0.441281	group_353	3.73108e-05	group_353	-0.219947	group_46	1.44e-06	group_353	-0.522731	group_270	5.96e-10	group_353	0.142244	group_174	0.0613835	group_174	0.116605	group_174	0.562447	group_174	0.28295	group_174	0.152688	group_174	0.351696	group_174	0.0720243	group_174	0.0686264	group_174	0.733766	group_174	-0.0279758	group_174	0.889833
group_73	-0.533244	group_73	2.97116e-07	group_73	-0.26062	group_72	1.44e-06	group_73	-0.73465	group_92	2.09e-09	group_73	0.0325128	group_175	0.0613835	group_175	0.116605	group_175	0.562447	group_175	0.28295	group_175	0.152688	group_175	0.351696	group_175	0.0720243	group_175	0.0686264	group_175	0.733766	group_175	-0.0279758	group_175	0.889833
group_128	0.369791	group_128	0.000679598	group_128	0.506037	group_74	1.44e-06	group_128	0.581217	group_94	2.09e-09	group_128	-0.0241121	group_176	0.0613835	group_176	0.116605	group_176	0.562447	group_176	0.28295	group_176	0.152688	group_176	0.351696	group_176	0.0720243	group_176	0.0686264	group_176	0.733766	group_176	-0.0279758	group_176	0.889833
nisC	0.369791	nisC	0.000679598	nisC	0.506037	group_82	1.44e-06	nisC	0.581217	group_351	2.54e-09	nisC	-0.0241121	group_177	0.0613835	group_177	0.116605	group_177	0.562447	group_177	0.28295	group_177	0.152688	group_177	0.351696	group_177	0.0720243	group_177	0.0686264	group_177	0.733766	group_177	-0.0279758	group_177	0.889833
group_143	0.369791	group_143	0.000679598	group_143	0.506037	glnB	1.44e-06	group_143	0.581217	group_350	4.16e-09	group_143	-0.0241121	group_178	0.0613835	group_178	0.116605	group_178	0.562447	group_178	0.28295	group_178	0.152688	group_178	0.351696	group_178	0.0720243	group_178	0.0686264	group_178	0.733766	group_178	-0.0279758	group_178	0.889833
group_144	0.369791	group_144	0.000679598	group_144	0.506037	group_93	1.44e-06	group_144	0.581217	group_199	7.95e-09	group_144	-0.0241121	group_179	0.0613835	group_179	0.116605	group_179	0.562447	group_179	0.28295	group_179	0.152688	group_179	0.351696	group_179	0.0720243	group_179	0.0686264	group_179	0.733766	group_179	-0.0279758	group_179	0.889833
group_145	0.369791	group_145	0.000679598	group_145	0.506037	group_100	1.44e-06	group_145	0.581217	group_200	7.95e-09	group_145	-0.0241121	group_18	0.744914	group_18	-0.0535052	group_18	0.790967	group_18	-0.137299	group_18	0.494662	group_18	-0.487995	group_18	0.00981448	group_18	0.0654654	group_18	0.74562	group_18	0.213498	group_18	0.284951
group_146	0.369791	group_146	0.000679598	group_146	0.506037	group_103	1.44e-06	group_146	0.581217	group_201	7.95e-09	group_146	-0.0241121	group_180	0.0613835	group_180	0.116605	group_180	0.562447	group_180	0.28295	group_180	0.152688	group_180	0.351696	group_180	0.0720243	group_180	0.0686264	group_180	0.733766	group_180	-0.0279758	group_180	0.889833
group_167	-0.512543	group_167	1.00001e-06	group_167	-0.266465	group_12	1.44e-06	group_167	-0.72765	group_77	7.95e-09	group_167	0.0843925	group_181	0.0613835	group_181	0.116605	group_181	0.562447	group_181	0.28295	group_181	0.152688	group_181	0.351696	group_181	0.0720243	group_181	0.0686264	group_181	0.733766	group_181	-0.0279758	group_181	0.889833
group_204	0.369791	group_204	0.000679598	group_204	0.506037	group_154	1.44e-06	group_204	0.581217	group_128	1.28e-08	group_204	-0.0241121	group_182	0.301378	group_182	0.267264	group_182	0.177755	group_182	0.404458	group_182	0.0363904	group_182	0.463142	group_182	0.0149799	group_182	0.0710072	group_182	0.724876	group_182	-0.0909744	group_182	0.651783
group_209	0.369791	group_209	0.000679598	group_209	0.506037	group_168	1.44e-06	group_209	0.581217	nisC	1.28e-08	group_209	-0.0241121	group_183	0.358692	group_183	-0.326663	group_183	0.0963013	group_183	-0.199708	group_183	0.317932	group_183	-0.198248	group_183	0.321555	group_183	-0.0654654	group_183	0.74562	group_183	-0.00762493	group_183	0.96989
group_210	0.369791	group_210	0.000679598	group_210	0.506037	group_34	1.44e-06	group_210	0.581217	group_143	1.28e-08	group_210	-0.0241121	group_184	0.0613835	group_184	0.116605	group_184	0.562447	group_184	0.28295	group_184	0.152688	group_184	0.351696	group_184	0.0720243	group_184	0.0686264	group_184	0.733766	group_184	-0.0279758	group_184	0.889833
group_225	0.369791	group_225	0.000679598	group_225	0.506037	group_40	1.44e-06	group_225	0.581217	group_144	1.28e-08	group_225	-0.0241121	group_185	0.358448	group_185	-0.0332165	group_185	0.869357	group_185	0.0161029	group_185	0.936461	group_185	-0.19112	group_185	0.339609	group_185	0.0482617	group_185	0.811068	group_185	0.140529	group_185	0.484464
group_226	0.369791	group_226	0.000679598	group_226	0.506037	group_412	1.44e-06	group_226	0.581217	group_145	1.28e-08	group_226	-0.0241121	group_186	0.358448	group_186	-0.0332165	group_186	0.869357	group_186	0.0161029	group_186	0.936461	group_186	-0.19112	group_186	0.339609	group_186	0.0482617	group_186	0.811068	group_186	0.140529	group_186	0.484464
group_227	0.369791	group_227	0.000679598	group_227	0.506037	group_413	1.44e-06	group_227	0.581217	group_146	1.28e-08	group_227	-0.0241121	group_187	0.0613835	group_187	0.116605	group_187	0.562447	group_187	0.28295	group_187	0.152688	group_187	0.351696	group_187	0.0720243	group_187	0.0686264	group_187	0.733766	group_187	-0.0279758	group_187	0.889833
pezA	0.369791	pezA	0.000679598	pezA	0.506037	group_414	1.44e-06	pezA	0.581217	group_204	1.28e-08	pezA	-0.0241121	group_188	0.358448	group_188	-0.0332165	group_188	0.869357	group_188	0.0161029	group_188	0.936461	group_188	-0.19112	group_188	0.339609	group_188	0.0482617	group_188	0.811068	group_188	0.140529	group_188	0.484464
pezT	0.369791	pezT	0.000679598	pezT	0.506037	group_415	1.44e-06	pezT	0.581217	group_209	1.28e-08	pezT	-0.0241121	group_19	0.526363	group_19	-0.0898191	group_19	0.655935	group_19	-0.0951997	group_19	0.636684	group_19	-0.148034	group_19	0.461192	group_19	-0.363137	group_19	0.0626374	group_19	-0.422955	group_19	0.0279435
group_230	0.369791	group_230	0.000679598	group_230	0.506037	group_416	1.44e-06	group_230	0.581217	group_210	1.28e-08	group_230	-0.0241121	group_190	0.358448	group_190	-0.0332165	group_190	0.869357	group_190	0.0161029	group_190	0.936461	group_190	-0.19112	group_190	0.339609	group_190	0.0482617	group_190	0.811068	group_190	0.140529	group_190	0.484464
group_231	0.369791	group_231	0.000679598	group_231	0.506037	group_417	1.44e-06	group_231	0.581217	group_225	1.28e-08	group_231	-0.0241121	group_191	0.358448	group_191	-0.0332165	group_191	0.869357	group_191	0.0161029	group_191	0.936461	group_191	-0.19112	group_191	0.339609	group_191	0.0482617	group_191	0.811068	group_191	0.140529	group_191	0.484464
group_232	0.369791	group_232	0.000679598	group_232	0.506037	group_418	1.44e-06	group_232	0.581217	group_226	1.28e-08	group_232	-0.0241121	group_192	0.358448	group_192	-0.0332165	group_192	0.869357	group_192	0.0161029	group_192	0.936461	group_192	-0.19112	group_192	0.339609	group_192	0.0482617	group_192	0.811068	group_192	0.140529	group_192	0.484464
group_233	0.369791	group_233	0.000679598	group_233	0.506037	group_419	1.44e-06	group_233	0.581217	group_227	1.28e-08	group_233	-0.0241121	group_193	0.358448	group_193	-0.0332165	group_193	0.869357	group_193	0.0161029	group_193	0.936461	group_193	-0.19112	group_193	0.339609	group_193	0.0482617	group_193	0.811068	group_193	0.140529	group_193	0.484464
group_234	0.369791	group_234	0.000679598	group_234	0.506037	group_420	1.44e-06	group_234	0.581217	pezA	1.28e-08	group_234	-0.0241121	group_194	0.0613835	group_194	0.116605	group_194	0.562447	group_194	0.28295	group_194	0.152688	group_194	0.351696	group_194	0.0720243	group_194	0.0686264	group_194	0.733766	group_194	-0.0279758	group_194	0.889833
regX3	0.369791	regX3	0.000679598	regX3	0.506037	group_421	1.44e-06	regX3	0.581217	pezT	1.28e-08	regX3	-0.0241121	group_195	0.358448	group_195	-0.0332165	group_195	0.869357	group_195	0.0161029	group_195	0.936461	group_195	-0.19112	group_195	0.339609	group_195	0.0482617	group_195	0.811068	group_195	0.140529	group_195	0.484464
creC	0.369791	creC	0.000679598	creC	0.506037	group_422	1.44e-06	creC	0.581217	group_230	1.28e-08	creC	-0.0241121	group_196	0.358448	group_196	-0.0332165	group_196	0.869357	group_196	0.0161029	group_196	0.936461	group_196	-0.19112	group_196	0.339609	group_196	0.0482617	group_196	0.811068	group_196	0.140529	group_196	0.484464
bcrA	0.369791	bcrA	0.000679598	bcrA	0.506037	group_423	1.44e-06	bcrA	0.581217	group_231	1.28e-08	bcrA	-0.0241121	group_197	0.301378	group_197	0.267264	group_197	0.177755	group_197	0.404458	group_197	0.0363904	group_197	0.463142	group_197	0.0149799	group_197	0.0710072	group_197	0.724876	group_197	-0.0909744	group_197	0.651783
group_238	0.369791	group_238	0.000679598	group_238	0.506037	group_424	1.44e-06	group_238	0.581217	group_232	1.28e-08	group_238	-0.0241121	group_198	0.0613835	group_198	0.116605	group_198	0.562447	group_198	0.28295	group_198	0.152688	group_198	0.351696	group_198	0.0720243	group_198	0.0686264	group_198	0.733766	group_198	-0.0279758	group_198	0.889833
group_239	0.369791	group_239	0.000679598	group_239	0.506037	group_425	1.44e-06	group_239	0.581217	group_233	1.28e-08	group_239	-0.0241121	group_199	0.185711	group_199	0.309767	group_199	0.115859	group_199	0.546076	group_199	0.00321265	group_199	0.457496	group_199	0.0164225	group_199	0.109109	group_199	0.587997	group_199	-0.0381246	group_199	0.850253
nisI	0.369791	nisI	0.000679598	nisI	0.506037	group_426	1.44e-06	nisI	0.581217	group_234	1.28e-08	nisI	-0.0241121	group_2	0.197347	group_2	-0.356942	group_2	0.0675942	group_2	-0.554804	group_2	0.00266919	group_2	-0.454812	group_2	0.0171471	group_2	-0.150188	group_2	0.454624	group_2	-0.0174928	group_2	0.930989
group_241	0.369791	group_241	0.000679598	group_241	0.506037	group_427	1.44e-06	group_241	0.581217	regX3	1.28e-08	group_241	-0.0241121	group_20	0.856887	group_20	0.121061	group_20	0.547506	group_20	0.0216363	group_20	0.914695	group_20	-0.148034	group_20	0.461192	group_20	-0.0907841	group_20	0.652466	group_20	-0.13746	group_20	0.49415
group_242	0.369791	group_242	0.000679598	group_242	0.506037	group_428	1.44e-06	group_242	0.581217	creC	1.28e-08	group_242	-0.0241121	group_200	0.185711	group_200	0.309767	group_200	0.115859	group_200	0.546076	group_200	0.00321265	group_200	0.457496	group_200	0.0164225	group_200	0.109109	group_200	0.587997	group_200	-0.0381246	group_200	0.850253
group_264	0.369791	group_264	0.000679598	group_264	0.506037	group_429	1.44e-06	group_264	0.581217	bcrA	1.28e-08	group_264	-0.0241121	group_201	0.185711	group_201	0.309767	group_201	0.115859	group_201	0.546076	group_201	0.00321265	group_201	0.457496	group_201	0.0164225	group_201	0.109109	group_201	0.587997	group_201	-0.0381246	group_201	0.850253
group_265	0.369791	group_265	0.000679598	group_265	0.506037	group_430	1.44e-06	group_265	0.581217	group_238	1.28e-08	group_265	-0.0241121	group_202	0.0613835	group_202	0.116605	group_202	0.562447	group_202	0.28295	group_202	0.152688	group_202	0.351696	group_202	0.0720243	group_202	0.0686264	group_202	0.733766	group_202	-0.0279758	group_202	0.889833
lacX_2	0.369791	lacX_2	0.000679598	lacX_2	0.506037	group_431	1.44e-06	lacX_2	0.581217	group_239	1.28e-08	lacX_2	-0.0241121	group_203	0.0613835	group_203	0.116605	group_203	0.562447	group_203	0.28295	group_203	0.152688	group_203	0.351696	group_203	0.0720243	group_203	0.0686264	group_203	0.733766	group_203	-0.0279758	group_203	0.889833
group_267	0.369791	group_267	0.000679598	group_267	0.506037	group_432	1.44e-06	group_267	0.581217	nisI	1.28e-08	group_267	-0.0241121	group_204	0.173358	group_204	0.289418	group_204	0.143126	group_204	0.389773	group_204	0.0444555	group_204	0.458131	group_204	0.0162548	group_204	0.10351	group_204	0.607402	group_204	-0.0241121	group_204	0.904975
group_268	0.369791	group_268	0.000679598	group_268	0.506037	group_433	1.44e-06	group_268	0.581217	group_241	1.28e-08	group_268	-0.0241121	group_205	0.168341	group_205	0.292702	group_205	0.138439	group_205	0.312544	group_205	0.112458	group_205	0.144098	group_205	0.473325	group_205	0.123718	group_205	0.538682	group_205	0.244966	group_205	0.218129
group_269	0.369791	group_269	0.000679598	group_269	0.506037	group_434	1.44e-06	group_269	0.581217	group_242	1.28e-08	group_269	-0.0241121	group_206	6.39e-05	group_206	0.0898191	group_206	0.655935	group_206	-0.255308	group_206	0.198697	group_206	-0.232625	group_206	0.242942	group_206	-0.181568	group_206	0.364735	group_206	-0.148034	group_206	0.461192
ltrA	0.369791	ltrA	0.000679598	ltrA	0.506037	topB	1.44e-06	ltrA	0.581217	group_264	1.28e-08	ltrA	-0.0241121	group_207	0.90222	group_207	0.329955	group_207	0.0927985	group_207	0.430486	group_207	0.0249948	group_207	0.374654	group_207	0.0541751	group_207	0.123718	group_207	0.538682	group_207	0.0144098	group_207	0.94313
group_281	0.369791	group_281	0.000679598	group_281	0.506037	group_436	1.44e-06	group_281	0.581217	group_265	1.28e-08	group_281	-0.0241121	group_209	0.173358	group_209	0.289418	group_209	0.143126	group_209	0.389773	group_209	0.0444555	group_209	0.458131	group_209	0.0162548	group_209	0.10351	group_209	0.607402	group_209	-0.0241121	group_209	0.904975
group_282	0.369791	group_282	0.000679598	group_282	0.506037	group_437	1.44e-06	group_282	0.581217	lacX_2	1.28e-08	group_282	-0.0241121	group_21	0.358448	group_21	0.0892693	group_21	0.657915	group_21	-0.0161029	group_21	0.936461	group_21	-0.213605	group_21	0.284705	group_21	0.241309	group_21	0.225297	group_21	0.314786	group_21	0.109768
group_283	0.369791	group_283	0.000679598	group_283	0.506037	group_438	1.44e-06	group_283	0.581217	group_267	1.28e-08	group_283	-0.0241121	group_210	0.173358	group_210	0.289418	group_210	0.143126	group_210	0.389773	group_210	0.0444555	group_210	0.458131	group_210	0.0162548	group_210	0.10351	group_210	0.607402	group_210	-0.0241121	group_210	0.904975
group_284	0.369791	group_284	0.000679598	group_284	0.506037	smc_1	1.44e-06	group_284	0.581217	group_268	1.28e-08	group_284	-0.0241121	group_211	0.631	group_211	0.145322	group_211	0.469534	group_211	0.356564	group_211	0.0679063	group_211	0.292301	group_211	0.139006	group_211	0.0965234	group_211	0.631982	group_211	0.0112423	group_211	0.955617
group_285	0.369791	group_285	0.000679598	group_285	0.506037	group_44	1.44e-06	group_285	0.581217	group_269	1.28e-08	group_285	-0.0241121	group_213	0.631	group_213	0.145322	group_213	0.469534	group_213	0.356564	group_213	0.0679063	group_213	0.292301	group_213	0.139006	group_213	0.0965234	group_213	0.631982	group_213	0.0112423	group_213	0.955617
group_286	0.369791	group_286	0.000679598	group_286	0.506037	group_440	1.44e-06	group_286	0.581217	ltrA	1.28e-08	group_286	-0.0241121	group_215	0.443209	group_215	0.471304	group_215	0.0130811	group_215	0.630351	group_215	0.000424718	group_215	0.544589	group_215	0.00331401	group_215	0.139573	group_215	0.487473	group_215	-0.0325128	group_215	0.872102
group_287	0.369791	group_287	0.000679598	group_287	0.506037	group_441	1.44e-06	group_287	0.581217	group_281	1.28e-08	group_287	-0.0241121	group_216	0.443209	group_216	0.471304	group_216	0.0130811	group_216	0.630351	group_216	0.000424718	group_216	0.544589	group_216	0.00331401	group_216	0.139573	group_216	0.487473	group_216	-0.0325128	group_216	0.872102
group_288	0.369791	group_288	0.000679598	group_288	0.506037	group_442	1.44e-06	group_288	0.581217	group_282	1.28e-08	group_288	-0.0241121	group_217	0.443209	group_217	0.471304	group_217	0.0130811	group_217	0.630351	group_217	0.000424718	group_217	0.544589	group_217	0.00331401	group_217	0.139573	group_217	0.487473	group_217	-0.0325128	group_217	0.872102
group_289	0.369791	group_289	0.000679598	group_289	0.506037	group_443	1.44e-06	group_289	0.581217	group_283	1.28e-08	group_289	-0.0241121	group_218	0.443209	group_218	0.471304	group_218	0.0130811	group_218	0.630351	group_218	0.000424718	group_218	0.544589	group_218	0.00331401	group_218	0.139573	group_218	0.487473	group_218	-0.0325128	group_218	0.872102
group_290	0.369791	group_290	0.000679598	group_290	0.506037	group_444	1.44e-06	group_290	0.581217	group_284	1.28e-08	group_290	-0.0241121	group_22	0.248904	group_22	0.154883	group_22	0.440477	group_22	0.0390054	group_22	0.846833	group_22	-0.0381246	group_22	0.850253	group_22	0.327327	group_22	0.0955874	group_22	0.266872	group_22	0.178416
group_291	0.369791	group_291	0.000679598	group_291	0.506037	group_445	1.44e-06	group_291	0.581217	group_285	1.28e-08	group_291	-0.0241121	group_220	0.443209	group_220	0.471304	group_220	0.0130811	group_220	0.630351	group_220	0.000424718	group_220	0.544589	group_220	0.00331401	group_220	0.139573	group_220	0.487473	group_220	-0.0325128	group_220	0.872102
group_294	0.369791	group_294	0.000679598	group_294	0.506037	group_446	1.44e-06	group_294	0.581217	group_286	1.28e-08	group_294	-0.0241121	group_221	0.443209	group_221	0.471304	group_221	0.0130811	group_221	0.630351	group_221	0.000424718	group_221	0.544589	group_221	0.00331401	group_221	0.139573	group_221	0.487473	group_221	-0.0325128	group_221	0.872102
group_295	0.369791	group_295	0.000679598	group_295	0.506037	group_447	1.44e-06	group_295	0.581217	group_287	1.28e-08	group_295	-0.0241121	group_222	0.443209	group_222	0.471304	group_222	0.0130811	group_222	0.630351	group_222	0.000424718	group_222	0.544589	group_222	0.00331401	group_222	0.139573	group_222	0.487473	group_222	-0.0325128	group_222	0.872102
group_296	0.369791	group_296	0.000679598	group_296	0.506037	group_448	1.44e-06	group_296	0.581217	group_288	1.28e-08	group_296	-0.0241121	group_223	0.443209	group_223	0.471304	group_223	0.0130811	group_223	0.630351	group_223	0.000424718	group_223	0.544589	group_223	0.00331401	group_223	0.139573	group_223	0.487473	group_223	-0.0325128	group_223	0.872102
group_297	0.369791	group_297	0.000679598	group_297	0.506037	group_449	1.44e-06	group_297	0.581217	group_289	1.28e-08	group_297	-0.0241121	group_224	0.443209	group_224	0.471304	group_224	0.0130811	group_224	0.630351	group_224	0.000424718	group_224	0.544589	group_224	0.00331401	group_224	0.139573	group_224	0.487473	group_224	-0.0325128	group_224	0.872102
group_345	0.369791	group_345	0.000679598	group_345	0.506037	group_450	1.44e-06	group_345	0.581217	group_290	1.28e-08	group_345	-0.0241121	group_225	0.173358	group_225	0.289418	group_225	0.143126	group_225	0.389773	group_225	0.0444555	group_225	0.458131	group_225	0.0162548	group_225	0.10351	group_225	0.607402	group_225	-0.0241121	group_225	0.904975
xerD	-0.512543	xerD	1.00001e-06	xerD	-0.266465	group_451	1.44e-06	xerD	-0.72765	group_291	1.28e-08	xerD	0.0843925	group_226	0.173358	group_226	0.289418	group_226	0.143126	group_226	0.389773	group_226	0.0444555	group_226	0.458131	group_226	0.0162548	group_226	0.10351	group_226	0.607402	group_226	-0.0241121	group_226	0.904975
group_42	0.369791	group_42	0.000679598	group_42	0.506037	group_452	1.44e-06	group_42	0.581217	group_294	1.28e-08	group_42	-0.0241121	group_227	0.173358	group_227	0.289418	group_227	0.143126	group_227	0.389773	group_227	0.0444555	group_227	0.458131	group_227	0.0162548	group_227	0.10351	group_227	0.607402	group_227	-0.0241121	group_227	0.904975
group_46	0.369791	group_46	0.000679598	group_46	0.506037	group_453	1.44e-06	group_46	0.581217	group_295	1.28e-08	group_46	-0.0241121	group_23	0.143913	group_23	-0.35764	group_23	0.0670211	group_23	-0.221551	group_23	0.266736	group_23	-0.0762493	group_23	0.705426	group_23	0.0654654	group_23	0.74562	group_23	0.213498	group_23	0.284951
group_72	0.369791	group_72	0.000679598	group_72	0.506037	group_454	1.44e-06	group_72	0.581217	group_296	1.28e-08	group_72	-0.0241121	group_230	0.173358	group_230	0.289418	group_230	0.143126	group_230	0.389773	group_230	0.0444555	group_230	0.458131	group_230	0.0162548	group_230	0.10351	group_230	0.607402	group_230	-0.0241121	group_230	0.904975
group_74	0.369791	group_74	0.000679598	group_74	0.506037	group_455	1.44e-06	group_74	0.581217	group_297	1.28e-08	group_74	-0.0241121	group_2307	0.856887	group_2307	0.121061	group_2307	0.547506	group_2307	0.0216363	group_2307	0.914695	group_2307	-0.148034	group_2307	0.461192	group_2307	-0.0907841	group_2307	0.652466	group_2307	-0.13746	group_2307	0.49415
cynR	-0.436654	cynR	4.59464e-05	cynR	-0.297617	group_456	1.44e-06	cynR	-0.652644	group_345	1.28e-08	cynR	0.0843925	group_231	0.173358	group_231	0.289418	group_231	0.143126	group_231	0.389773	group_231	0.0444555	group_231	0.458131	group_231	0.0162548	group_231	0.10351	group_231	0.607402	group_231	-0.0241121	group_231	0.904975
group_82	0.369791	group_82	0.000679598	group_82	0.506037	group_457	1.44e-06	group_82	0.581217	group_42	1.28e-08	group_82	-0.0241121	group_232	0.173358	group_232	0.289418	group_232	0.143126	group_232	0.389773	group_232	0.0444555	group_232	0.458131	group_232	0.0162548	group_232	0.10351	group_232	0.607402	group_232	-0.0241121	group_232	0.904975
glnB	0.369791	glnB	0.000679598	glnB	0.506037	group_458	1.44e-06	glnB	0.581217	group_46	1.28e-08	glnB	-0.0241121	group_233	0.173358	group_233	0.289418	group_233	0.143126	group_233	0.389773	group_233	0.0444555	group_233	0.458131	group_233	0.0162548	group_233	0.10351	group_233	0.607402	group_233	-0.0241121	group_233	0.904975
group_93	0.369791	group_93	0.000679598	group_93	0.506037	group_461	1.44e-06	group_93	0.581217	group_72	1.28e-08	group_93	-0.0241121	group_234	0.173358	group_234	0.289418	group_234	0.143126	group_234	0.389773	group_234	0.0444555	group_234	0.458131	group_234	0.0162548	group_234	0.10351	group_234	0.607402	group_234	-0.0241121	group_234	0.904975
group_152	0.382415	group_152	0.000426432	group_152	0.49454	group_462	1.44e-06	group_152	0.576813	group_74	1.28e-08	group_152	0.0279758	group_238	0.173358	group_238	0.289418	group_238	0.143126	group_238	0.389773	group_238	0.0444555	group_238	0.458131	group_238	0.0162548	group_238	0.10351	group_238	0.607402	group_238	-0.0241121	group_238	0.904975
group_156	0.382415	group_156	0.000426432	group_156	0.49454	group_463	1.44e-06	group_156	0.576813	group_82	1.28e-08	group_156	0.0279758	group_239	0.173358	group_239	0.289418	group_239	0.143126	group_239	0.389773	group_239	0.0444555	group_239	0.458131	group_239	0.0162548	group_239	0.10351	group_239	0.607402	group_239	-0.0241121	group_239	0.904975
group_157	0.382415	group_157	0.000426432	group_157	0.49454	group_464	1.44e-06	group_157	0.576813	glnB	1.28e-08	group_157	0.0279758	group_24	0.358692	group_24	-0.205573	group_24	0.30363	group_24	-0.221551	group_24	0.266736	group_24	-0.0762493	group_24	0.705426	group_24	-0.130931	group_24	0.515076	group_24	-0.198248	group_24	0.321555
group_164	0.382415	group_164	0.000426432	group_164	0.49454	group_465	1.44e-06	group_164	0.576813	group_93	1.28e-08	group_164	0.0279758	group_241	0.173358	group_241	0.289418	group_241	0.143126	group_241	0.389773	group_241	0.0444555	group_241	0.458131	group_241	0.0162548	group_241	0.10351	group_241	0.607402	group_241	-0.0241121	group_241	0.904975
group_302	0.382415	group_302	0.000426432	group_302	0.49454	group_466	1.44e-06	group_302	0.576813	group_100	1.28e-08	group_302	0.0279758	group_242	0.173358	group_242	0.289418	group_242	0.143126	group_242	0.389773	group_242	0.0444555	group_242	0.458131	group_242	0.0162548	group_242	0.10351	group_242	0.607402	group_242	-0.0241121	group_242	0.904975
group_304	0.382415	group_304	0.000426432	group_304	0.49454	group_467	1.44e-06	group_304	0.576813	group_103	1.28e-08	group_304	0.0279758	group_244	0.0613835	group_244	0.116605	group_244	0.562447	group_244	0.28295	group_244	0.152688	group_244	0.351696	group_244	0.0720243	group_244	0.0686264	group_244	0.733766	group_244	-0.0279758	group_244	0.889833
group_326	0.382415	group_326	0.000426432	group_326	0.49454	group_468	1.44e-06	group_326	0.576813	group_12	1.28e-08	group_326	0.0279758	group_2446	0.0613835	group_2446	0.116605	group_2446	0.562447	group_2446	0.28295	group_2446	0.152688	group_2446	0.351696	group_2446	0.0720243	group_2446	0.0686264	group_2446	0.733766	group_2446	-0.0279758	group_2446	0.889833
group_327	0.382415	group_327	0.000426432	group_327	0.49454	group_469	1.44e-06	group_327	0.576813	group_154	1.28e-08	group_327	0.0279758	group_2447	0.940561	group_2447	0.471616	group_2447	0.0130126	group_2447	0.508272	group_2447	0.006791	group_2447	0.0962103	group_2447	0.633093	group_2447	0.187735	group_2447	0.348392	group_2447	0.21866	group_2447	0.273187
group_328	0.382415	group_328	0.000426432	group_328	0.49454	qseB	1.44e-06	group_328	0.576813	group_168	1.28e-08	group_328	0.0279758	group_2448	0.358692	group_2448	-0.205573	group_2448	0.30363	group_2448	-0.221551	group_2448	0.266736	group_2448	-0.0762493	group_2448	0.705426	group_2448	-0.130931	group_2448	0.515076	group_2448	-0.198248	group_2448	0.321555
group_329	0.382415	group_329	0.000426432	group_329	0.49454	group_471	1.44e-06	group_329	0.576813	group_34	1.28e-08	group_329	0.0279758	group_246	0.0613835	group_246	0.116605	group_246	0.562447	group_246	0.28295	group_246	0.152688	group_246	0.351696	group_246	0.0720243	group_246	0.0686264	group_246	0.733766	group_246	-0.0279758	group_246	0.889833
group_330	0.382415	group_330	0.000426432	group_330	0.49454	group_472	1.44e-06	group_330	0.576813	group_40	1.28e-08	group_330	0.0279758	group_247	0.0613835	group_247	0.116605	group_247	0.562447	group_247	0.28295	group_247	0.152688	group_247	0.351696	group_247	0.0720243	group_247	0.0686264	group_247	0.733766	group_247	-0.0279758	group_247	0.889833
group_331	0.382415	group_331	0.000426432	group_331	0.49454	group_473	1.44e-06	group_331	0.576813	group_412	1.28e-08	group_331	0.0279758	group_248	0.0613835	group_248	0.116605	group_248	0.562447	group_248	0.28295	group_248	0.152688	group_248	0.351696	group_248	0.0720243	group_248	0.0686264	group_248	0.733766	group_248	-0.0279758	group_248	0.889833
group_332	0.382415	group_332	0.000426432	group_332	0.49454	group_474	1.44e-06	group_332	0.576813	group_413	1.28e-08	group_332	0.0279758	group_249	0.0613835	group_249	0.116605	group_249	0.562447	group_249	0.28295	group_249	0.152688	group_249	0.351696	group_249	0.0720243	group_249	0.0686264	group_249	0.733766	group_249	-0.0279758	group_249	0.889833
group_333	0.382415	group_333	0.000426432	group_333	0.49454	group_475	1.44e-06	group_333	0.576813	group_414	1.28e-08	group_333	0.0279758	group_25	0.412082	group_25	-0.247048	group_25	0.214119	group_25	-0.326659	group_25	0.0963063	group_25	-0.112423	group_25	0.576638	group_25	-0.0482617	group_25	0.811068	group_25	0.0112423	group_25	0.955617
group_334	0.382415	group_334	0.000426432	group_334	0.49454	group_476	1.44e-06	group_334	0.576813	group_415	1.28e-08	group_334	0.0279758	group_250	0.0613835	group_250	0.116605	group_250	0.562447	group_250	0.28295	group_250	0.152688	group_250	0.351696	group_250	0.0720243	group_250	0.0686264	group_250	0.733766	group_250	-0.0279758	group_250	0.889833
group_335	0.382415	group_335	0.000426432	group_335	0.49454	group_477	1.44e-06	group_335	0.576813	group_416	1.28e-08	group_335	0.0279758	group_251	0.0613835	group_251	0.116605	group_251	0.562447	group_251	0.28295	group_251	0.152688	group_251	0.351696	group_251	0.0720243	group_251	0.0686264	group_251	0.733766	group_251	-0.0279758	group_251	0.889833
group_107	0.174545	group_107	0.119119	group_107	0.279654	group_478	1.44e-06	group_107	0.410167	group_417	1.28e-08	group_107	-0.0279758	group_252	0.185711	group_252	-0.225285	group_252	0.258551	group_252	-0.171624	group_252	0.392019	group_252	-0.152499	group_252	0.447632	group_252	4.16e-21	group_252	1	group_252	0.0953116	group_252	0.636286
group_170	0.174545	group_170	0.119119	group_170	0.279654	group_479	1.44e-06	group_170	0.410167	group_418	1.28e-08	group_170	-0.0279758	group_253	0.0613835	group_253	0.116605	group_253	0.562447	group_253	0.28295	group_253	0.152688	group_253	0.351696	group_253	0.0720243	group_253	0.0686264	group_253	0.733766	group_253	-0.0279758	group_253	0.889833
group_171	0.174545	group_171	0.119119	group_171	0.279654	cadC	1.44e-06	group_171	0.410167	group_419	1.28e-08	group_171	-0.0279758	group_254	0.0613835	group_254	0.116605	group_254	0.562447	group_254	0.28295	group_254	0.152688	group_254	0.351696	group_254	0.0720243	group_254	0.0686264	group_254	0.733766	group_254	-0.0279758	group_254	0.889833
group_172	0.174545	group_172	0.119119	group_172	0.279654	group_481	1.44e-06	group_172	0.410167	group_420	1.28e-08	group_172	-0.0279758	group_255	0.0613835	group_255	0.116605	group_255	0.562447	group_255	0.28295	group_255	0.152688	group_255	0.351696	group_255	0.0720243	group_255	0.0686264	group_255	0.733766	group_255	-0.0279758	group_255	0.889833
group_173	0.174545	group_173	0.119119	group_173	0.279654	group_482	1.44e-06	group_173	0.410167	group_421	1.28e-08	group_173	-0.0279758	group_256	0.0613835	group_256	0.116605	group_256	0.562447	group_256	0.28295	group_256	0.152688	group_256	0.351696	group_256	0.0720243	group_256	0.0686264	group_256	0.733766	group_256	-0.0279758	group_256	0.889833
group_174	0.174545	group_174	0.119119	group_174	0.279654	group_483	1.44e-06	group_174	0.410167	group_422	1.28e-08	group_174	-0.0279758	group_257	0.0613835	group_257	0.116605	group_257	0.562447	group_257	0.28295	group_257	0.152688	group_257	0.351696	group_257	0.0720243	group_257	0.0686264	group_257	0.733766	group_257	-0.0279758	group_257	0.889833
group_175	0.174545	group_175	0.119119	group_175	0.279654	group_484	1.44e-06	group_175	0.410167	group_423	1.28e-08	group_175	-0.0279758	group_258	0.0613835	group_258	0.116605	group_258	0.562447	group_258	0.28295	group_258	0.152688	group_258	0.351696	group_258	0.0720243	group_258	0.0686264	group_258	0.733766	group_258	-0.0279758	group_258	0.889833
group_176	0.174545	group_176	0.119119	group_176	0.279654	dinB_2	1.44e-06	group_176	0.410167	group_424	1.28e-08	group_176	-0.0279758	group_259	0.0613835	group_259	0.116605	group_259	0.562447	group_259	0.28295	group_259	0.152688	group_259	0.351696	group_259	0.0720243	group_259	0.0686264	group_259	0.733766	group_259	-0.0279758	group_259	0.889833
group_177	0.174545	group_177	0.119119	group_177	0.279654	group_486	1.44e-06	group_177	0.410167	group_425	1.28e-08	group_177	-0.0279758	group_260	0.0613835	group_260	0.116605	group_260	0.562447	group_260	0.28295	group_260	0.152688	group_260	0.351696	group_260	0.0720243	group_260	0.0686264	group_260	0.733766	group_260	-0.0279758	group_260	0.889833
group_178	0.174545	group_178	0.119119	group_178	0.279654	group_487	1.44e-06	group_178	0.410167	group_426	1.28e-08	group_178	-0.0279758	group_261	0.526363	group_261	0.300699	group_261	0.127493	group_261	0.328872	group_261	0.0939406	group_261	0.148034	group_261	0.461192	group_261	0.363137	group_261	0.0626374	group_261	0.422955	group_261	0.0279435
group_179	0.174545	group_179	0.119119	group_179	0.279654	group_488	1.44e-06	group_179	0.410167	group_427	1.28e-08	group_179	-0.0279758	group_262	0.0799171	group_262	-0.187621	group_262	0.34869	group_262	-0.136382	group_262	0.497576	group_262	-0.251974	group_262	0.204827	group_262	-0.0348932	group_262	0.862822	group_262	0.0325128	group_262	0.872102
group_180	0.174545	group_180	0.119119	group_180	0.279654	group_489	1.44e-06	group_180	0.410167	group_428	1.28e-08	group_180	-0.0279758	group_263	0.606365	group_263	0.231535	group_263	0.245221	group_263	0.276295	group_263	0.162996	group_263	0.33757	group_263	0.0850645	group_263	0.10351	group_263	0.607402	group_263	0.0241121	group_263	0.904975
group_181	0.174545	group_181	0.119119	group_181	0.279654	group_490	1.44e-06	group_181	0.410167	group_429	1.28e-08	group_181	-0.0279758	group_264	0.173358	group_264	0.289418	group_264	0.143126	group_264	0.389773	group_264	0.0444555	group_264	0.458131	group_264	0.0162548	group_264	0.10351	group_264	0.607402	group_264	-0.0241121	group_264	0.904975
group_184	0.174545	group_184	0.119119	group_184	0.279654	group_491	1.44e-06	group_184	0.410167	group_430	1.28e-08	group_184	-0.0279758	group_265	0.173358	group_265	0.289418	group_265	0.143126	group_265	0.389773	group_265	0.0444555	group_265	0.458131	group_265	0.0162548	group_265	0.10351	group_265	0.607402	group_265	-0.0241121	group_265	0.904975
group_187	0.174545	group_187	0.119119	group_187	0.279654	group_492	1.44e-06	group_187	0.410167	group_431	1.28e-08	group_187	-0.0279758	group_267	0.173358	group_267	0.289418	group_267	0.143126	group_267	0.389773	group_267	0.0444555	group_267	0.458131	group_267	0.0162548	group_267	0.10351	group_267	0.607402	group_267	-0.0241121	group_267	0.904975
group_194	0.174545	group_194	0.119119	group_194	0.279654	group_493	1.44e-06	group_194	0.410167	group_432	1.28e-08	group_194	-0.0279758	group_268	0.173358	group_268	0.289418	group_268	0.143126	group_268	0.389773	group_268	0.0444555	group_268	0.458131	group_268	0.0162548	group_268	0.10351	group_268	0.607402	group_268	-0.0241121	group_268	0.904975
group_198	0.174545	group_198	0.119119	group_198	0.279654	group_494	1.44e-06	group_198	0.410167	group_433	1.28e-08	group_198	-0.0279758	group_269	0.173358	group_269	0.289418	group_269	0.143126	group_269	0.389773	group_269	0.0444555	group_269	0.458131	group_269	0.0162548	group_269	0.10351	group_269	0.607402	group_269	-0.0241121	group_269	0.904975
group_202	0.174545	group_202	0.119119	group_202	0.279654	group_495	1.44e-06	group_202	0.410167	group_434	1.28e-08	group_202	-0.0279758	group_27	0.168341	group_27	0.101115	group_27	0.615781	group_27	0.153324	group_27	0.44515	group_27	-0.115278	group_27	0.566934	group_27	0.123718	group_27	0.538682	group_27	0.244966	group_27	0.218129
group_203	0.174545	group_203	0.119119	group_203	0.279654	group_496	1.44e-06	group_203	0.410167	topB	1.28e-08	group_203	-0.0279758	group_270	0.631	group_270	0.145322	group_270	0.469534	group_270	0.356564	group_270	0.0679063	group_270	0.292301	group_270	0.139006	group_270	0.0965234	group_270	0.631982	group_270	0.0112423	group_270	0.955617
xerC_2	0.174545	xerC_2	0.119119	xerC_2	0.279654	group_497	1.44e-06	xerC_2	0.410167	group_436	1.28e-08	xerC_2	-0.0279758	group_271	0.443209	group_271	0.471304	group_271	0.0130811	group_271	0.630351	group_271	0.000424718	group_271	0.544589	group_271	0.00331401	group_271	0.139573	group_271	0.487473	group_271	-0.0325128	group_271	0.872102
group_244	0.174545	group_244	0.119119	group_244	0.279654	group_498	1.44e-06	group_244	0.410167	group_437	1.28e-08	group_244	-0.0279758	group_273	0.443209	group_273	0.471304	group_273	0.0130811	group_273	0.630351	group_273	0.000424718	group_273	0.544589	group_273	0.00331401	group_273	0.139573	group_273	0.487473	group_273	-0.0325128	group_273	0.872102
group_2446	0.174545	group_2446	0.119119	group_2446	0.279654	group_499	1.44e-06	group_2446	0.410167	group_438	1.28e-08	group_2446	-0.0279758	group_275	0.443209	group_275	0.471304	group_275	0.0130811	group_275	0.630351	group_275	0.000424718	group_275	0.544589	group_275	0.00331401	group_275	0.139573	group_275	0.487473	group_275	-0.0325128	group_275	0.872102
lexA	0.174545	lexA	0.119119	lexA	0.279654	group_500	1.44e-06	lexA	0.410167	smc_1	1.28e-08	lexA	-0.0279758	group_276	0.443209	group_276	0.471304	group_276	0.0130811	group_276	0.630351	group_276	0.000424718	group_276	0.544589	group_276	0.00331401	group_276	0.139573	group_276	0.487473	group_276	-0.0325128	group_276	0.872102
group_246	0.174545	group_246	0.119119	group_246	0.279654	group_501	1.44e-06	group_246	0.410167	group_44	1.28e-08	group_246	-0.0279758	group_277	0.443209	group_277	0.471304	group_277	0.0130811	group_277	0.630351	group_277	0.000424718	group_277	0.544589	group_277	0.00331401	group_277	0.139573	group_277	0.487473	group_277	-0.0325128	group_277	0.872102
group_247	0.174545	group_247	0.119119	group_247	0.279654	group_502	1.44e-06	group_247	0.410167	group_440	1.28e-08	group_247	-0.0279758	group_278	0.443209	group_278	0.471304	group_278	0.0130811	group_278	0.630351	group_278	0.000424718	group_278	0.544589	group_278	0.00331401	group_278	0.139573	group_278	0.487473	group_278	-0.0325128	group_278	0.872102
group_248	0.174545	group_248	0.119119	group_248	0.279654	group_503	1.44e-06	group_248	0.410167	group_441	1.28e-08	group_248	-0.0279758	group_279	0.443209	group_279	0.471304	group_279	0.0130811	group_279	0.630351	group_279	0.000424718	group_279	0.544589	group_279	0.00331401	group_279	0.139573	group_279	0.487473	group_279	-0.0325128	group_279	0.872102
group_249	0.174545	group_249	0.119119	group_249	0.279654	group_504	1.44e-06	group_249	0.410167	group_442	1.28e-08	group_249	-0.0279758	group_28	0.324774	group_28	0.0704016	group_28	0.727134	group_28	0.296441	group_28	0.133239	group_28	0.457496	group_28	0.0164225	group_28	-2.22e-20	group_28	1	group_28	-0.190623	group_28	0.340889
group_250	0.174545	group_250	0.119119	group_250	0.279654	group_505	1.44e-06	group_250	0.410167	group_443	1.28e-08	group_250	-0.0279758	group_281	0.173358	group_281	0.289418	group_281	0.143126	group_281	0.389773	group_281	0.0444555	group_281	0.458131	group_281	0.0162548	group_281	0.10351	group_281	0.607402	group_281	-0.0241121	group_281	0.904975
group_251	0.174545	group_251	0.119119	group_251	0.279654	fic	1.44e-06	group_251	0.410167	group_444	1.28e-08	group_251	-0.0279758	group_282	0.173358	group_282	0.289418	group_282	0.143126	group_282	0.389773	group_282	0.0444555	group_282	0.458131	group_282	0.0162548	group_282	0.10351	group_282	0.607402	group_282	-0.0241121	group_282	0.904975
group_253	0.174545	group_253	0.119119	group_253	0.279654	group_507	1.44e-06	group_253	0.410167	group_445	1.28e-08	group_253	-0.0279758	group_283	0.173358	group_283	0.289418	group_283	0.143126	group_283	0.389773	group_283	0.0444555	group_283	0.458131	group_283	0.0162548	group_283	0.10351	group_283	0.607402	group_283	-0.0241121	group_283	0.904975
group_254	0.174545	group_254	0.119119	group_254	0.279654	group_508	1.44e-06	group_254	0.410167	group_446	1.28e-08	group_254	-0.0279758	group_284	0.173358	group_284	0.289418	group_284	0.143126	group_284	0.389773	group_284	0.0444555	group_284	0.458131	group_284	0.0162548	group_284	0.10351	group_284	0.607402	group_284	-0.0241121	group_284	0.904975
group_255	0.174545	group_255	0.119119	group_255	0.279654	group_509	1.44e-06	group_255	0.410167	group_447	1.28e-08	group_255	-0.0279758	group_285	0.173358	group_285	0.289418	group_285	0.143126	group_285	0.389773	group_285	0.0444555	group_285	0.458131	group_285	0.0162548	group_285	0.10351	group_285	0.607402	group_285	-0.0241121	group_285	0.904975
group_256	0.174545	group_256	0.119119	group_256	0.279654	group_510	1.44e-06	group_256	0.410167	group_448	1.28e-08	group_256	-0.0279758	group_286	0.173358	group_286	0.289418	group_286	0.143126	group_286	0.389773	group_286	0.0444555	group_286	0.458131	group_286	0.0162548	group_286	0.10351	group_286	0.607402	group_286	-0.0241121	group_286	0.904975
group_257	0.174545	group_257	0.119119	group_257	0.279654	group_511	1.44e-06	group_257	0.410167	group_449	1.28e-08	group_257	-0.0279758	group_287	0.173358	group_287	0.289418	group_287	0.143126	group_287	0.389773	group_287	0.0444555	group_287	0.458131	group_287	0.0162548	group_287	0.10351	group_287	0.607402	group_287	-0.0241121	group_287	0.904975
group_258	0.174545	group_258	0.119119	group_258	0.279654	group_512	1.44e-06	group_258	0.410167	group_450	1.28e-08	group_258	-0.0279758	group_288	0.173358	group_288	0.289418	group_288	0.143126	group_288	0.389773	group_288	0.0444555	group_288	0.458131	group_288	0.0162548	group_288	0.10351	group_288	0.607402	group_288	-0.0241121	group_288	0.904975
group_259	0.174545	group_259	0.119119	group_259	0.279654	group_513	1.44e-06	group_259	0.410167	group_451	1.28e-08	group_259	-0.0279758	group_289	0.173358	group_289	0.289418	group_289	0.143126	group_289	0.389773	group_289	0.0444555	group_289	0.458131	group_289	0.0162548	group_289	0.10351	group_289	0.607402	group_289	-0.0241121	group_289	0.904975
radD	0.174545	radD	0.119119	radD	0.279654	group_514	1.44e-06	radD	0.410167	group_452	1.28e-08	radD	-0.0279758	group_29	0.0613835	group_29	0.116605	group_29	0.562447	group_29	0.28295	group_29	0.152688	group_29	0.351696	group_29	0.0720243	group_29	0.0686264	group_29	0.733766	group_29	-0.0279758	group_29	0.889833
group_260	0.174545	group_260	0.119119	group_260	0.279654	group_515	1.44e-06	group_260	0.410167	group_453	1.28e-08	group_260	-0.0279758	group_290	0.173358	group_290	0.289418	group_290	0.143126	group_290	0.389773	group_290	0.0444555	group_290	0.458131	group_290	0.0162548	group_290	0.10351	group_290	0.607402	group_290	-0.0241121	group_290	0.904975
group_29	0.174545	group_29	0.119119	group_29	0.279654	group_516	1.44e-06	group_29	0.410167	group_454	1.28e-08	group_29	-0.0279758	group_291	0.173358	group_291	0.289418	group_291	0.143126	group_291	0.389773	group_291	0.0444555	group_291	0.458131	group_291	0.0162548	group_291	0.10351	group_291	0.607402	group_291	-0.0241121	group_291	0.904975
group_31	0.174545	group_31	0.119119	group_31	0.279654	group_517	1.44e-06	group_31	0.410167	group_455	1.28e-08	group_31	-0.0279758	group_292	0.443209	group_292	0.471304	group_292	0.0130811	group_292	0.630351	group_292	0.000424718	group_292	0.544589	group_292	0.00331401	group_292	0.139573	group_292	0.487473	group_292	-0.0325128	group_292	0.872102
group_6	0.174545	group_6	0.119119	group_6	0.279654	group_518	1.44e-06	group_6	0.410167	group_456	1.28e-08	group_6	-0.0279758	group_293	0.443209	group_293	0.471304	group_293	0.0130811	group_293	0.630351	group_293	0.000424718	group_293	0.544589	group_293	0.00331401	group_293	0.139573	group_293	0.487473	group_293	-0.0325128	group_293	0.872102
group_76	0.174545	group_76	0.119119	group_76	0.279654	group_519	1.44e-06	group_76	0.410167	group_457	1.28e-08	group_76	-0.0279758	group_294	0.173358	group_294	0.289418	group_294	0.143126	group_294	0.389773	group_294	0.0444555	group_294	0.458131	group_294	0.0162548	group_294	0.10351	group_294	0.607402	group_294	-0.0241121	group_294	0.904975
group_79	0.174545	group_79	0.119119	group_79	0.279654	group_520	1.44e-06	group_79	0.410167	group_458	1.28e-08	group_79	-0.0279758	group_295	0.173358	group_295	0.289418	group_295	0.143126	group_295	0.389773	group_295	0.0444555	group_295	0.458131	group_295	0.0162548	group_295	0.10351	group_295	0.607402	group_295	-0.0241121	group_295	0.904975
group_92	-0.374606	group_92	0.000570179	group_92	-0.452927	group_521	1.44e-06	group_92	-0.605663	group_461	1.28e-08	group_92	0.079931	group_296	0.173358	group_296	0.289418	group_296	0.143126	group_296	0.389773	group_296	0.0444555	group_296	0.458131	group_296	0.0162548	group_296	0.10351	group_296	0.607402	group_296	-0.0241121	group_296	0.904975
group_94	-0.374606	group_94	0.000570179	group_94	-0.452927	intS	1.44e-06	group_94	-0.605663	group_462	1.28e-08	group_94	0.079931	group_297	0.173358	group_297	0.289418	group_297	0.143126	group_297	0.389773	group_297	0.0444555	group_297	0.458131	group_297	0.0162548	group_297	0.10351	group_297	0.607402	group_297	-0.0241121	group_297	0.904975
group_100	-0.369791	group_100	0.000679598	group_100	-0.506037	group_523	1.44e-06	group_100	-0.581217	group_463	1.28e-08	group_100	0.0241121	group_298	0.320887	group_298	-0.0425749	group_298	0.833002	group_298	0.0471765	group_298	0.815244	group_298	-0.201737	group_298	0.312938	group_298	0.123718	group_298	0.538682	group_298	0.244966	group_298	0.218129
group_103	-0.369791	group_103	0.000679598	group_103	-0.506037	group_524	1.44e-06	group_103	-0.581217	group_464	1.28e-08	group_103	0.0241121	group_299	0.197347	group_299	0.356942	group_299	0.0675942	group_299	0.554804	group_299	0.00266919	group_299	0.454812	group_299	0.0171471	group_299	0.150188	group_299	0.454624	group_299	0.0174928	group_299	0.930989
group_12	-0.369791	group_12	0.000679598	group_12	-0.506037	group_525	1.44e-06	group_12	-0.581217	group_465	1.28e-08	group_12	0.0241121	group_3	0.526363	group_3	-0.300699	group_3	0.127493	group_3	-0.445708	group_3	0.0198045	group_3	0.232625	group_3	0.242942	group_3	0.181568	group_3	0.364735	group_3	0.148034	group_3	0.461192
group_154	-0.369791	group_154	0.000679598	group_154	-0.506037	group_526	1.44e-06	group_154	-0.581217	group_466	1.28e-08	group_154	0.0241121	group_30	0.622312	group_30	0.388496	group_30	0.045219	group_30	0.418691	group_30	0.0297337	group_30	0.057639	group_30	0.77521	group_30	0.123718	group_30	0.538682	group_30	0.115278	group_30	0.566934
group_168	-0.369791	group_168	0.000679598	group_168	-0.506037	group_527	1.44e-06	group_168	-0.581217	group_467	1.28e-08	group_168	0.0241121	group_300	0.526363	group_300	0.0898191	group_300	0.655935	group_300	0.328872	group_300	0.0939406	group_300	-0.0422955	group_300	0.834083	group_300	0.0907841	group_300	0.652466	group_300	0.13746	group_300	0.49415
group_263	0.309484	group_263	0.00493198	group_263	0.263498	group_528	1.44e-06	group_263	0.382919	group_468	1.28e-08	group_263	0.0241121	group_301	0.526363	group_301	0.0898191	group_301	0.655935	group_301	0.328872	group_301	0.0939406	group_301	-0.0422955	group_301	0.834083	group_301	0.0907841	group_301	0.652466	group_301	0.13746	group_301	0.49415
group_34	-0.369791	group_34	0.000679598	group_34	-0.506037	group_529	1.44e-06	group_34	-0.581217	group_469	1.28e-08	group_34	0.0241121	group_302	0.107641	group_302	0.321772	group_302	0.101688	group_302	0.511927	group_302	0.00633983	group_302	0.43962	group_302	0.0217626	group_302	0.137253	group_302	0.494809	group_302	0.0279758	group_302	0.889833
group_40	-0.369791	group_40	0.000679598	group_40	-0.506037	group_530	1.44e-06	group_40	-0.581217	qseB	1.28e-08	group_40	0.0241121	group_303	0.0356551	group_303	0.106569	group_303	0.596767	group_303	0.40582	group_303	0.035706	group_303	0.398282	group_303	0.0396264	group_303	0.139573	group_303	0.487473	group_303	0.0772179	group_303	0.701851
group_412	-0.369791	group_412	0.000679598	group_412	-0.506037	group_531	1.44e-06	group_412	-0.581217	group_471	1.28e-08	group_412	0.0241121	group_304	0.107641	group_304	0.321772	group_304	0.101688	group_304	0.511927	group_304	0.00633983	group_304	0.43962	group_304	0.0217626	group_304	0.137253	group_304	0.494809	group_304	0.0279758	group_304	0.889833
group_413	-0.369791	group_413	0.000679598	group_413	-0.506037	group_532	1.44e-06	group_413	-0.581217	group_472	1.28e-08	group_413	0.0241121	group_305	0.526363	group_305	0.0898191	group_305	0.655935	group_305	0.328872	group_305	0.0939406	group_305	-0.0422955	group_305	0.834083	group_305	0.0907841	group_305	0.652466	group_305	0.13746	group_305	0.49415
group_414	-0.369791	group_414	0.000679598	group_414	-0.506037	group_533	1.44e-06	group_414	-0.581217	group_473	1.28e-08	group_414	0.0241121	group_306	0.526363	group_306	0.0898191	group_306	0.655935	group_306	0.328872	group_306	0.0939406	group_306	-0.0422955	group_306	0.834083	group_306	0.0907841	group_306	0.652466	group_306	0.13746	group_306	0.49415
group_415	-0.369791	group_415	0.000679598	group_415	-0.506037	group_534	1.44e-06	group_415	-0.581217	group_474	1.28e-08	group_415	0.0241121	group_307	0.443209	group_307	0.471304	group_307	0.0130811	group_307	0.630351	group_307	0.000424718	group_307	0.544589	group_307	0.00331401	group_307	0.139573	group_307	0.487473	group_307	-0.0325128	group_307	0.872102
group_416	-0.369791	group_416	0.000679598	group_416	-0.506037	group_535	1.44e-06	group_416	-0.581217	group_475	1.28e-08	group_416	0.0241121	group_308	0.443209	group_308	0.471304	group_308	0.0130811	group_308	0.630351	group_308	0.000424718	group_308	0.544589	group_308	0.00331401	group_308	0.139573	group_308	0.487473	group_308	-0.0325128	group_308	0.872102
group_417	-0.369791	group_417	0.000679598	group_417	-0.506037	dnaG_1	1.44e-06	group_417	-0.581217	group_476	1.28e-08	group_417	0.0241121	group_309	0.443209	group_309	0.471304	group_309	0.0130811	group_309	0.630351	group_309	0.000424718	group_309	0.544589	group_309	0.00331401	group_309	0.139573	group_309	0.487473	group_309	-0.0325128	group_309	0.872102
group_418	-0.369791	group_418	0.000679598	group_418	-0.506037	group_537	1.44e-06	group_418	-0.581217	group_477	1.28e-08	group_418	0.0241121	group_31	0.0613835	group_31	0.116605	group_31	0.562447	group_31	0.28295	group_31	0.152688	group_31	0.351696	group_31	0.0720243	group_31	0.0686264	group_31	0.733766	group_31	-0.0279758	group_31	0.889833
group_419	-0.369791	group_419	0.000679598	group_419	-0.506037	group_538	1.44e-06	group_419	-0.581217	group_478	1.28e-08	group_419	0.0241121	group_310	0.443209	group_310	0.471304	group_310	0.0130811	group_310	0.630351	group_310	0.000424718	group_310	0.544589	group_310	0.00331401	group_310	0.139573	group_310	0.487473	group_310	-0.0325128	group_310	0.872102
group_420	-0.369791	group_420	0.000679598	group_420	-0.506037	group_539	1.44e-06	group_420	-0.581217	group_479	1.28e-08	group_420	0.0241121	group_311	0.443209	group_311	0.471304	group_311	0.0130811	group_311	0.630351	group_311	0.000424718	group_311	0.544589	group_311	0.00331401	group_311	0.139573	group_311	0.487473	group_311	-0.0325128	group_311	0.872102
group_421	-0.369791	group_421	0.000679598	group_421	-0.506037	group_540	1.44e-06	group_421	-0.581217	cadC	1.28e-08	group_421	0.0241121	group_312	0.443209	group_312	0.471304	group_312	0.0130811	group_312	0.630351	group_312	0.000424718	group_312	0.544589	group_312	0.00331401	group_312	0.139573	group_312	0.487473	group_312	-0.0325128	group_312	0.872102
group_422	-0.369791	group_422	0.000679598	group_422	-0.506037	group_541	1.44e-06	group_422	-0.581217	group_481	1.28e-08	group_422	0.0241121	group_313	0.443209	group_313	0.471304	group_313	0.0130811	group_313	0.630351	group_313	0.000424718	group_313	0.544589	group_313	0.00331401	group_313	0.139573	group_313	0.487473	group_313	-0.0325128	group_313	0.872102
group_423	-0.369791	group_423	0.000679598	group_423	-0.506037	group_542	1.44e-06	group_423	-0.581217	group_482	1.28e-08	group_423	0.0241121	group_314	0.443209	group_314	0.471304	group_314	0.0130811	group_314	0.630351	group_314	0.000424718	group_314	0.544589	group_314	0.00331401	group_314	0.139573	group_314	0.487473	group_314	-0.0325128	group_314	0.872102
group_424	-0.369791	group_424	0.000679598	group_424	-0.506037	group_543	1.44e-06	group_424	-0.581217	group_483	1.28e-08	group_424	0.0241121	group_315	0.443209	group_315	0.471304	group_315	0.0130811	group_315	0.630351	group_315	0.000424718	group_315	0.544589	group_315	0.00331401	group_315	0.139573	group_315	0.487473	group_315	-0.0325128	group_315	0.872102
group_425	-0.369791	group_425	0.000679598	group_425	-0.506037	group_544	1.44e-06	group_425	-0.581217	group_484	1.28e-08	group_425	0.0241121	group_316	0.443209	group_316	0.471304	group_316	0.0130811	group_316	0.630351	group_316	0.000424718	group_316	0.544589	group_316	0.00331401	group_316	0.139573	group_316	0.487473	group_316	-0.0325128	group_316	0.872102
group_426	-0.369791	group_426	0.000679598	group_426	-0.506037	group_545	1.44e-06	group_426	-0.581217	dinB_2	1.28e-08	group_426	0.0241121	group_317	0.443209	group_317	0.471304	group_317	0.0130811	group_317	0.630351	group_317	0.000424718	group_317	0.544589	group_317	0.00331401	group_317	0.139573	group_317	0.487473	group_317	-0.0325128	group_317	0.872102
group_427	-0.369791	group_427	0.000679598	group_427	-0.506037	group_546	1.44e-06	group_427	-0.581217	group_486	1.28e-08	group_427	0.0241121	group_318	0.443209	group_318	0.471304	group_318	0.0130811	group_318	0.630351	group_318	0.000424718	group_318	0.544589	group_318	0.00331401	group_318	0.139573	group_318	0.487473	group_318	-0.0325128	group_318	0.872102
group_428	-0.369791	group_428	0.000679598	group_428	-0.506037	group_547	1.44e-06	group_428	-0.581217	group_487	1.28e-08	group_428	0.0241121	group_319	0.443209	group_319	0.471304	group_319	0.0130811	group_319	0.630351	group_319	0.000424718	group_319	0.544589	group_319	0.00331401	group_319	0.139573	group_319	0.487473	group_319	-0.0325128	group_319	0.872102
group_429	-0.369791	group_429	0.000679598	group_429	-0.506037	group_548	1.44e-06	group_429	-0.581217	group_488	1.28e-08	group_429	0.0241121	group_320	0.443209	group_320	0.471304	group_320	0.0130811	group_320	0.630351	group_320	0.000424718	group_320	0.544589	group_320	0.00331401	group_320	0.139573	group_320	0.487473	group_320	-0.0325128	group_320	0.872102
group_430	-0.369791	group_430	0.000679598	group_430	-0.506037	group_549	1.44e-06	group_430	-0.581217	group_489	1.28e-08	group_430	0.0241121	group_321	0.443209	group_321	0.471304	group_321	0.0130811	group_321	0.630351	group_321	0.000424718	group_321	0.544589	group_321	0.00331401	group_321	0.139573	group_321	0.487473	group_321	-0.0325128	group_321	0.872102
group_431	-0.369791	group_431	0.000679598	group_431	-0.506037	group_550	1.44e-06	group_431	-0.581217	group_490	1.28e-08	group_431	0.0241121	group_322	0.443209	group_322	0.471304	group_322	0.0130811	group_322	0.630351	group_322	0.000424718	group_322	0.544589	group_322	0.00331401	group_322	0.139573	group_322	0.487473	group_322	-0.0325128	group_322	0.872102
group_432	-0.369791	group_432	0.000679598	group_432	-0.506037	group_551	1.44e-06	group_432	-0.581217	group_491	1.28e-08	group_432	0.0241121	group_323	0.443209	group_323	0.471304	group_323	0.0130811	group_323	0.630351	group_323	0.000424718	group_323	0.544589	group_323	0.00331401	group_323	0.139573	group_323	0.487473	group_323	-0.0325128	group_323	0.872102
group_433	-0.369791	group_433	0.000679598	group_433	-0.506037	group_552	1.44e-06	group_433	-0.581217	group_492	1.28e-08	group_433	0.0241121	group_324	0.412082	group_324	0.247048	group_324	0.214119	group_324	0.326659	group_324	0.0963063	group_324	0.112423	group_324	0.576638	group_324	0.0482617	group_324	0.811068	group_324	-0.0112423	group_324	0.955617
group_434	-0.369791	group_434	0.000679598	group_434	-0.506037	group_553	1.44e-06	group_434	-0.581217	group_493	1.28e-08	group_434	0.0241121	group_325	0.412082	group_325	0.247048	group_325	0.214119	group_325	0.326659	group_325	0.0963063	group_325	0.112423	group_325	0.576638	group_325	0.0482617	group_325	0.811068	group_325	-0.0112423	group_325	0.955617
topB	-0.369791	topB	0.000679598	topB	-0.506037	group_554	1.44e-06	topB	-0.581217	group_494	1.28e-08	topB	0.0241121	group_326	0.107641	group_326	0.321772	group_326	0.101688	group_326	0.511927	group_326	0.00633983	group_326	0.43962	group_326	0.0217626	group_326	0.137253	group_326	0.494809	group_326	0.0279758	group_326	0.889833
group_436	-0.369791	group_436	0.000679598	group_436	-0.506037	group_555	1.44e-06	group_436	-0.581217	group_495	1.28e-08	group_436	0.0241121	group_327	0.107641	group_327	0.321772	group_327	0.101688	group_327	0.511927	group_327	0.00633983	group_327	0.43962	group_327	0.0217626	group_327	0.137253	group_327	0.494809	group_327	0.0279758	group_327	0.889833
group_437	-0.369791	group_437	0.000679598	group_437	-0.506037	group_556	1.44e-06	group_437	-0.581217	group_496	1.28e-08	group_437	0.0241121	group_328	0.107641	group_328	0.321772	group_328	0.101688	group_328	0.511927	group_328	0.00633983	group_328	0.43962	group_328	0.0217626	group_328	0.137253	group_328	0.494809	group_328	0.0279758	group_328	0.889833
group_438	-0.369791	group_438	0.000679598	group_438	-0.506037	group_557	1.44e-06	group_438	-0.581217	group_497	1.28e-08	group_438	0.0241121	group_329	0.107641	group_329	0.321772	group_329	0.101688	group_329	0.511927	group_329	0.00633983	group_329	0.43962	group_329	0.0217626	group_329	0.137253	group_329	0.494809	group_329	0.0279758	group_329	0.889833
smc_1	-0.369791	smc_1	0.000679598	smc_1	-0.506037	group_558	1.44e-06	smc_1	-0.581217	group_498	1.28e-08	smc_1	0.0241121	group_330	0.107641	group_330	0.321772	group_330	0.101688	group_330	0.511927	group_330	0.00633983	group_330	0.43962	group_330	0.0217626	group_330	0.137253	group_330	0.494809	group_330	0.0279758	group_330	0.889833
group_44	-0.369791	group_44	0.000679598	group_44	-0.506037	group_559	1.44e-06	group_44	-0.581217	group_499	1.28e-08	group_44	0.0241121	group_331	0.107641	group_331	0.321772	group_331	0.101688	group_331	0.511927	group_331	0.00633983	group_331	0.43962	group_331	0.0217626	group_331	0.137253	group_331	0.494809	group_331	0.0279758	group_331	0.889833
group_440	-0.369791	group_440	0.000679598	group_440	-0.506037	group_560	1.44e-06	group_440	-0.581217	group_500	1.28e-08	group_440	0.0241121	group_332	0.107641	group_332	0.321772	group_332	0.101688	group_332	0.511927	group_332	0.00633983	group_332	0.43962	group_332	0.0217626	group_332	0.137253	group_332	0.494809	group_332	0.0279758	group_332	0.889833
group_441	-0.369791	group_441	0.000679598	group_441	-0.506037	group_561	1.44e-06	group_441	-0.581217	group_501	1.28e-08	group_441	0.0241121	group_333	0.107641	group_333	0.321772	group_333	0.101688	group_333	0.511927	group_333	0.00633983	group_333	0.43962	group_333	0.0217626	group_333	0.137253	group_333	0.494809	group_333	0.0279758	group_333	0.889833
group_442	-0.369791	group_442	0.000679598	group_442	-0.506037	group_562	1.44e-06	group_442	-0.581217	group_502	1.28e-08	group_442	0.0241121	group_334	0.107641	group_334	0.321772	group_334	0.101688	group_334	0.511927	group_334	0.00633983	group_334	0.43962	group_334	0.0217626	group_334	0.137253	group_334	0.494809	group_334	0.0279758	group_334	0.889833
group_443	-0.369791	group_443	0.000679598	group_443	-0.506037	group_563	1.44e-06	group_443	-0.581217	group_503	1.28e-08	group_443	0.0241121	group_335	0.107641	group_335	0.321772	group_335	0.101688	group_335	0.511927	group_335	0.00633983	group_335	0.43962	group_335	0.0217626	group_335	0.137253	group_335	0.494809	group_335	0.0279758	group_335	0.889833
group_444	-0.369791	group_444	0.000679598	group_444	-0.506037	xerC_3	1.44e-06	group_444	-0.581217	group_504	1.28e-08	group_444	0.0241121	group_336	0.622312	group_336	0.388496	group_336	0.045219	group_336	0.418691	group_336	0.0297337	group_336	0.057639	group_336	0.77521	group_336	0.123718	group_336	0.538682	group_336	0.115278	group_336	0.566934
group_445	-0.369791	group_445	0.000679598	group_445	-0.506037	group_565	1.44e-06	group_445	-0.581217	group_505	1.28e-08	group_445	0.0241121	group_337	0.622312	group_337	0.388496	group_337	0.045219	group_337	0.418691	group_337	0.0297337	group_337	0.057639	group_337	0.77521	group_337	0.123718	group_337	0.538682	group_337	0.115278	group_337	0.566934
group_446	-0.369791	group_446	0.000679598	group_446	-0.506037	immR	1.44e-06	group_446	-0.581217	fic	1.28e-08	group_446	0.0241121	group_338	0.622312	group_338	0.388496	group_338	0.045219	group_338	0.418691	group_338	0.0297337	group_338	0.057639	group_338	0.77521	group_338	0.123718	group_338	0.538682	group_338	0.115278	group_338	0.566934
group_447	-0.369791	group_447	0.000679598	group_447	-0.506037	group_567	1.44e-06	group_447	-0.581217	group_507	1.28e-08	group_447	0.0241121	group_339	0.443209	group_339	0.471304	group_339	0.0130811	group_339	0.630351	group_339	0.000424718	group_339	0.544589	group_339	0.00331401	group_339	0.139573	group_339	0.487473	group_339	-0.0325128	group_339	0.872102
group_448	-0.369791	group_448	0.000679598	group_448	-0.506037	group_568	1.44e-06	group_448	-0.581217	group_508	1.28e-08	group_448	0.0241121	group_34	0.173358	group_34	-0.289418	group_34	0.143126	group_34	-0.389773	group_34	0.0444555	group_34	-0.458131	group_34	0.0162548	group_34	-0.10351	group_34	0.607402	group_34	0.0241121	group_34	0.904975
group_449	-0.369791	group_449	0.000679598	group_449	-0.506037	lacC_4	1.44e-06	group_449	-0.581217	group_509	1.28e-08	group_449	0.0241121	group_340	0.443209	group_340	0.471304	group_340	0.0130811	group_340	0.630351	group_340	0.000424718	group_340	0.544589	group_340	0.00331401	group_340	0.139573	group_340	0.487473	group_340	-0.0325128	group_340	0.872102
group_450	-0.369791	group_450	0.000679598	group_450	-0.506037	group_570	1.44e-06	group_450	-0.581217	group_510	1.28e-08	group_450	0.0241121	group_341	0.443209	group_341	0.471304	group_341	0.0130811	group_341	0.630351	group_341	0.000424718	group_341	0.544589	group_341	0.00331401	group_341	0.139573	group_341	0.487473	group_341	-0.0325128	group_341	0.872102
group_451	-0.369791	group_451	0.000679598	group_451	-0.506037	group_596	1.44e-06	group_451	-0.581217	group_511	1.28e-08	group_451	0.0241121	group_342	0.443209	group_342	0.471304	group_342	0.0130811	group_342	0.630351	group_342	0.000424718	group_342	0.544589	group_342	0.00331401	group_342	0.139573	group_342	0.487473	group_342	-0.0325128	group_342	0.872102
group_452	-0.369791	group_452	0.000679598	group_452	-0.506037	group_597	1.44e-06	group_452	-0.581217	group_512	1.28e-08	group_452	0.0241121	group_343	0.443209	group_343	0.471304	group_343	0.0130811	group_343	0.630351	group_343	0.000424718	group_343	0.544589	group_343	0.00331401	group_343	0.139573	group_343	0.487473	group_343	-0.0325128	group_343	0.872102
group_453	-0.369791	group_453	0.000679598	group_453	-0.506037	group_598	1.44e-06	group_453	-0.581217	group_513	1.28e-08	group_453	0.0241121	group_345	0.173358	group_345	0.289418	group_345	0.143126	group_345	0.389773	group_345	0.0444555	group_345	0.458131	group_345	0.0162548	group_345	0.10351	group_345	0.607402	group_345	-0.0241121	group_345	0.904975
group_454	-0.369791	group_454	0.000679598	group_454	-0.506037	group_599	1.44e-06	group_454	-0.581217	group_514	1.28e-08	group_454	0.0241121	group_346	0.0393566	group_346	-0.0213811	group_346	0.915698	group_346	0.267382	group_346	0.177557	group_346	0.239841	group_346	0.228216	group_346	0.0710072	group_346	0.724876	group_346	0.020676	group_346	0.918469
group_455	-0.369791	group_455	0.000679598	group_455	-0.506037	group_600	1.44e-06	group_455	-0.581217	group_515	1.28e-08	group_455	0.0241121	group_347	0.386223	group_347	0.329955	group_347	0.0927985	group_347	0.271265	group_347	0.171105	group_347	0.374654	group_347	0.0541751	group_347	0.123718	group_347	0.538682	group_347	0.0144098	group_347	0.94313
group_456	-0.369791	group_456	0.000679598	group_456	-0.506037	group_601	1.44e-06	group_456	-0.581217	group_516	1.28e-08	group_456	0.0241121	group_348	0.0393566	group_348	-0.0213811	group_348	0.915698	group_348	0.267382	group_348	0.177557	group_348	0.239841	group_348	0.228216	group_348	0.0710072	group_348	0.724876	group_348	0.020676	group_348	0.918469
group_457	-0.369791	group_457	0.000679598	group_457	-0.506037	group_602	1.44e-06	group_457	-0.581217	group_517	1.28e-08	group_457	0.0241121	group_349	0.386223	group_349	0.329955	group_349	0.0927985	group_349	0.271265	group_349	0.171105	group_349	0.374654	group_349	0.0541751	group_349	0.123718	group_349	0.538682	group_349	0.0144098	group_349	0.94313
group_458	-0.369791	group_458	0.000679598	group_458	-0.506037	group_603	1.44e-06	group_458	-0.581217	group_518	1.28e-08	group_458	0.0241121	group_350	0.794724	group_350	0.25063	group_350	0.207335	group_350	0.199708	group_350	0.317932	group_350	0.0609994	group_350	0.762465	group_350	-0.130931	group_350	0.515076	group_350	-0.198248	group_350	0.321555
group_461	-0.369791	group_461	0.000679598	group_461	-0.506037	group_604	1.44e-06	group_461	-0.581217	group_519	1.28e-08	group_461	0.0241121	group_351	0.870877	group_351	0.0915221	group_351	0.649818	group_351	0.249635	group_351	0.209204	group_351	0.190623	group_351	0.340889	group_351	4.16e-21	group_351	1	group_351	-0.0762493	group_351	0.705426
group_462	-0.369791	group_462	0.000679598	group_462	-0.506037	group_605	1.44e-06	group_462	-0.581217	group_520	1.28e-08	group_462	0.0241121	group_352	0.013043	group_352	-0.196909	group_352	0.324901	group_352	-0.0471765	group_352	0.815244	group_352	0.0288195	group_352	0.886532	group_352	-2.1e-21	group_352	1	group_352	0.0144098	group_352	0.94313
group_463	-0.369791	group_463	0.000679598	group_463	-0.506037	group_606	1.44e-06	group_463	-0.581217	group_521	1.28e-08	group_463	0.0241121	group_353	0.626821	group_353	-0.552356	group_353	0.00281302	group_353	-0.540539	group_353	0.00360427	group_353	-0.398282	group_353	0.0396264	group_353	-0.0348932	group_353	0.862822	group_353	0.142244	group_353	0.479097
group_464	-0.369791	group_464	0.000679598	group_464	-0.506037	group_607	1.44e-06	group_464	-0.581217	intS	1.28e-08	group_464	0.0241121	group_355	0.744914	group_355	0.25063	group_355	0.207335	group_355	0.283959	group_355	0.151167	group_355	0.198248	group_355	0.321555	group_355	0.0654654	group_355	0.74562	group_355	0.00762493	group_355	0.96989
group_465	-0.369791	group_465	0.000679598	group_465	-0.506037	group_608	1.44e-06	group_465	-0.581217	group_523	1.28e-08	group_465	0.0241121	group_357	0.744914	group_357	0.25063	group_357	0.207335	group_357	0.283959	group_357	0.151167	group_357	0.198248	group_357	0.321555	group_357	0.0654654	group_357	0.74562	group_357	0.00762493	group_357	0.96989
group_466	-0.369791	group_466	0.000679598	group_466	-0.506037	group_609	1.44e-06	group_466	-0.581217	group_524	1.28e-08	group_466	0.0241121	group_358	0.526363	group_358	0.2265	group_358	0.255923	group_358	0.138472	group_358	0.490945	group_358	0.232625	group_358	0.242942	group_358	0.181568	group_358	0.364735	group_358	0.148034	group_358	0.461192
group_467	-0.369791	group_467	0.000679598	group_467	-0.506037	group_610	1.44e-06	group_467	-0.581217	group_525	1.28e-08	group_467	0.0241121	group_359	0.526363	group_359	0.2265	group_359	0.255923	group_359	0.138472	group_359	0.490945	group_359	0.232625	group_359	0.242942	group_359	0.181568	group_359	0.364735	group_359	0.148034	group_359	0.461192
group_468	-0.369791	group_468	0.000679598	group_468	-0.506037	group_611	1.44e-06	group_468	-0.581217	group_526	1.28e-08	group_468	0.0241121	group_360	0.526363	group_360	0.2265	group_360	0.255923	group_360	0.138472	group_360	0.490945	group_360	0.232625	group_360	0.242942	group_360	0.181568	group_360	0.364735	group_360	0.148034	group_360	0.461192
group_469	-0.369791	group_469	0.000679598	group_469	-0.506037	group_612	1.44e-06	group_469	-0.581217	group_527	1.28e-08	group_469	0.0241121	group_362	0.856887	group_362	0.121061	group_362	0.547506	group_362	0.255308	group_362	0.198697	group_362	0.0422955	group_362	0.834083	group_362	-0.0907841	group_362	0.652466	group_362	-0.13746	group_362	0.49415
qseB	-0.369791	qseB	0.000679598	qseB	-0.506037	group_613	1.44e-06	qseB	-0.581217	group_528	1.28e-08	qseB	0.0241121	group_363	0.856887	group_363	0.121061	group_363	0.547506	group_363	0.255308	group_363	0.198697	group_363	0.0422955	group_363	0.834083	group_363	-0.0907841	group_363	0.652466	group_363	-0.13746	group_363	0.49415
group_471	-0.369791	group_471	0.000679598	group_471	-0.506037	group_614	1.44e-06	group_471	-0.581217	group_529	1.28e-08	group_471	0.0241121	group_364	0.856887	group_364	0.121061	group_364	0.547506	group_364	0.255308	group_364	0.198697	group_364	0.0422955	group_364	0.834083	group_364	-0.0907841	group_364	0.652466	group_364	-0.13746	group_364	0.49415
group_472	-0.369791	group_472	0.000679598	group_472	-0.506037	group_615	1.44e-06	group_472	-0.581217	group_530	1.28e-08	group_472	0.0241121	group_365	0.856887	group_365	0.121061	group_365	0.547506	group_365	0.255308	group_365	0.198697	group_365	0.0422955	group_365	0.834083	group_365	-0.0907841	group_365	0.652466	group_365	-0.13746	group_365	0.49415
group_473	-0.369791	group_473	0.000679598	group_473	-0.506037	group_616	1.44e-06	group_473	-0.581217	group_531	1.28e-08	group_473	0.0241121	group_368	0.412082	group_368	-0.247048	group_368	0.214119	group_368	-0.326659	group_368	0.0963063	group_368	-0.112423	group_368	0.576638	group_368	-0.0482617	group_368	0.811068	group_368	0.0112423	group_368	0.955617
group_474	-0.369791	group_474	0.000679598	group_474	-0.506037	group_617	1.44e-06	group_474	-0.581217	group_532	1.28e-08	group_474	0.0241121	group_369	0.412082	group_369	-0.247048	group_369	0.214119	group_369	-0.326659	group_369	0.0963063	group_369	-0.112423	group_369	0.576638	group_369	-0.0482617	group_369	0.811068	group_369	0.0112423	group_369	0.955617
group_475	-0.369791	group_475	0.000679598	group_475	-0.506037	group_618	1.44e-06	group_475	-0.581217	group_533	1.28e-08	group_475	0.0241121	group_372	0.412082	group_372	-0.247048	group_372	0.214119	group_372	-0.326659	group_372	0.0963063	group_372	-0.112423	group_372	0.576638	group_372	-0.0482617	group_372	0.811068	group_372	0.0112423	group_372	0.955617
group_476	-0.369791	group_476	0.000679598	group_476	-0.506037	uvrB_2	1.44e-06	group_476	-0.581217	group_534	1.28e-08	group_476	0.0241121	group_374	0.412082	group_374	-0.247048	group_374	0.214119	group_374	-0.326659	group_374	0.0963063	group_374	-0.112423	group_374	0.576638	group_374	-0.0482617	group_374	0.811068	group_374	0.0112423	group_374	0.955617
group_477	-0.369791	group_477	0.000679598	group_477	-0.506037	group_620	1.44e-06	group_477	-0.581217	group_535	1.28e-08	group_477	0.0241121	group_375	0.412082	group_375	-0.247048	group_375	0.214119	group_375	-0.326659	group_375	0.0963063	group_375	-0.112423	group_375	0.576638	group_375	-0.0482617	group_375	0.811068	group_375	0.0112423	group_375	0.955617
group_478	-0.369791	group_478	0.000679598	group_478	-0.506037	group_621	1.44e-06	group_478	-0.581217	dnaG_1	1.28e-08	group_478	0.0241121	group_376	0.412082	group_376	-0.247048	group_376	0.214119	group_376	-0.326659	group_376	0.0963063	group_376	-0.112423	group_376	0.576638	group_376	-0.0482617	group_376	0.811068	group_376	0.0112423	group_376	0.955617
group_479	-0.369791	group_479	0.000679598	group_479	-0.506037	group_622	1.44e-06	group_479	-0.581217	group_537	1.28e-08	group_479	0.0241121	group_377	0.412082	group_377	-0.247048	group_377	0.214119	group_377	-0.326659	group_377	0.0963063	group_377	-0.112423	group_377	0.576638	group_377	-0.0482617	group_377	0.811068	group_377	0.0112423	group_377	0.955617
cadC	-0.369791	cadC	0.000679598	cadC	-0.506037	group_623	1.44e-06	cadC	-0.581217	group_538	1.28e-08	cadC	0.0241121	group_379	0.412082	group_379	-0.247048	group_379	0.214119	group_379	-0.326659	group_379	0.0963063	group_379	-0.112423	group_379	0.576638	group_379	-0.0482617	group_379	0.811068	group_379	0.0112423	group_379	0.955617
group_481	-0.369791	group_481	0.000679598	group_481	-0.506037	group_624	1.44e-06	group_481	-0.581217	group_539	1.28e-08	group_481	0.0241121	group_38	0.443209	group_38	0.471304	group_38	0.0130811	group_38	0.630351	group_38	0.000424718	group_38	0.544589	group_38	0.00331401	group_38	0.139573	group_38	0.487473	group_38	-0.0325128	group_38	0.872102
group_482	-0.369791	group_482	0.000679598	group_482	-0.506037	group_625	1.44e-06	group_482	-0.581217	group_540	1.28e-08	group_482	0.0241121	group_380	0.412082	group_380	-0.247048	group_380	0.214119	group_380	-0.326659	group_380	0.0963063	group_380	-0.112423	group_380	0.576638	group_380	-0.0482617	group_380	0.811068	group_380	0.0112423	group_380	0.955617
group_483	-0.369791	group_483	0.000679598	group_483	-0.506037	group_626	1.44e-06	group_483	-0.581217	group_541	1.28e-08	group_483	0.0241121	group_381	0.412082	group_381	-0.247048	group_381	0.214119	group_381	-0.326659	group_381	0.0963063	group_381	-0.112423	group_381	0.576638	group_381	-0.0482617	group_381	0.811068	group_381	0.0112423	group_381	0.955617
group_484	-0.369791	group_484	0.000679598	group_484	-0.506037	group_627	1.44e-06	group_484	-0.581217	group_542	1.28e-08	group_484	0.0241121	group_382	0.412082	group_382	-0.247048	group_382	0.214119	group_382	-0.326659	group_382	0.0963063	group_382	-0.112423	group_382	0.576638	group_382	-0.0482617	group_382	0.811068	group_382	0.0112423	group_382	0.955617
dinB_2	-0.369791	dinB_2	0.000679598	dinB_2	-0.506037	group_628	1.44e-06	dinB_2	-0.581217	group_543	1.28e-08	dinB_2	0.0241121	group_383	0.412082	group_383	-0.247048	group_383	0.214119	group_383	-0.326659	group_383	0.0963063	group_383	-0.112423	group_383	0.576638	group_383	-0.0482617	group_383	0.811068	group_383	0.0112423	group_383	0.955617
group_486	-0.369791	group_486	0.000679598	group_486	-0.506037	group_629	1.44e-06	group_486	-0.581217	group_544	1.28e-08	group_486	0.0241121	group_384	0.412082	group_384	-0.247048	group_384	0.214119	group_384	-0.326659	group_384	0.0963063	group_384	-0.112423	group_384	0.576638	group_384	-0.0482617	group_384	0.811068	group_384	0.0112423	group_384	0.955617
group_487	-0.369791	group_487	0.000679598	group_487	-0.506037	dexB_1	1.44e-06	group_487	-0.581217	group_545	1.28e-08	group_487	0.0241121	group_385	0.412082	group_385	-0.247048	group_385	0.214119	group_385	-0.326659	group_385	0.0963063	group_385	-0.112423	group_385	0.576638	group_385	-0.0482617	group_385	0.811068	group_385	0.0112423	group_385	0.955617
group_488	-0.369791	group_488	0.000679598	group_488	-0.506037	group_630	1.44e-06	group_488	-0.581217	group_546	1.28e-08	group_488	0.0241121	group_386	0.412082	group_386	-0.247048	group_386	0.214119	group_386	-0.326659	group_386	0.0963063	group_386	-0.112423	group_386	0.576638	group_386	-0.0482617	group_386	0.811068	group_386	0.0112423	group_386	0.955617
group_489	-0.369791	group_489	0.000679598	group_489	-0.506037	group_631	1.44e-06	group_489	-0.581217	group_547	1.28e-08	group_489	0.0241121	group_387	0.412082	group_387	-0.247048	group_387	0.214119	group_387	-0.326659	group_387	0.0963063	group_387	-0.112423	group_387	0.576638	group_387	-0.0482617	group_387	0.811068	group_387	0.0112423	group_387	0.955617
group_490	-0.369791	group_490	0.000679598	group_490	-0.506037	group_632	1.44e-06	group_490	-0.581217	group_548	1.28e-08	group_490	0.0241121	group_388	0.412082	group_388	-0.247048	group_388	0.214119	group_388	-0.326659	group_388	0.0963063	group_388	-0.112423	group_388	0.576638	group_388	-0.0482617	group_388	0.811068	group_388	0.0112423	group_388	0.955617
group_491	-0.369791	group_491	0.000679598	group_491	-0.506037	group_638	1.44e-06	group_491	-0.581217	group_549	1.28e-08	group_491	0.0241121	group_389	0.412082	group_389	-0.247048	group_389	0.214119	group_389	-0.326659	group_389	0.0963063	group_389	-0.112423	group_389	0.576638	group_389	-0.0482617	group_389	0.811068	group_389	0.0112423	group_389	0.955617
group_492	-0.369791	group_492	0.000679598	group_492	-0.506037	group_639	1.44e-06	group_492	-0.581217	group_550	1.28e-08	group_492	0.0241121	group_390	0.412082	group_390	-0.247048	group_390	0.214119	group_390	-0.326659	group_390	0.0963063	group_390	-0.112423	group_390	0.576638	group_390	-0.0482617	group_390	0.811068	group_390	0.0112423	group_390	0.955617
group_493	-0.369791	group_493	0.000679598	group_493	-0.506037	group_640	1.44e-06	group_493	-0.581217	group_551	1.28e-08	group_493	0.0241121	group_391	0.412082	group_391	-0.247048	group_391	0.214119	group_391	-0.326659	group_391	0.0963063	group_391	-0.112423	group_391	0.576638	group_391	-0.0482617	group_391	0.811068	group_391	0.0112423	group_391	0.955617
group_494	-0.369791	group_494	0.000679598	group_494	-0.506037	group_641	1.44e-06	group_494	-0.581217	group_552	1.28e-08	group_494	0.0241121	group_392	0.412082	group_392	-0.247048	group_392	0.214119	group_392	-0.326659	group_392	0.0963063	group_392	-0.112423	group_392	0.576638	group_392	-0.0482617	group_392	0.811068	group_392	0.0112423	group_392	0.955617
group_495	-0.369791	group_495	0.000679598	group_495	-0.506037	group_642	1.44e-06	group_495	-0.581217	group_553	1.28e-08	group_495	0.0241121	group_393	0.412082	group_393	-0.247048	group_393	0.214119	group_393	-0.326659	group_393	0.0963063	group_393	-0.112423	group_393	0.576638	group_393	-0.0482617	group_393	0.811068	group_393	0.0112423	group_393	0.955617
group_496	-0.369791	group_496	0.000679598	group_496	-0.506037	group_645	1.44e-06	group_496	-0.581217	group_554	1.28e-08	group_496	0.0241121	group_394	0.412082	group_394	-0.247048	group_394	0.214119	group_394	-0.326659	group_394	0.0963063	group_394	-0.112423	group_394	0.576638	group_394	-0.0482617	group_394	0.811068	group_394	0.0112423	group_394	0.955617
group_497	-0.369791	group_497	0.000679598	group_497	-0.506037	group_152	2.7e-06	group_497	-0.581217	group_555	1.28e-08	group_497	0.0241121	group_395	0.412082	group_395	-0.247048	group_395	0.214119	group_395	-0.326659	group_395	0.0963063	group_395	-0.112423	group_395	0.576638	group_395	-0.0482617	group_395	0.811068	group_395	0.0112423	group_395	0.955617
group_498	-0.369791	group_498	0.000679598	group_498	-0.506037	group_156	2.7e-06	group_498	-0.581217	group_556	1.28e-08	group_498	0.0241121	group_396	0.412082	group_396	-0.247048	group_396	0.214119	group_396	-0.326659	group_396	0.0963063	group_396	-0.112423	group_396	0.576638	group_396	-0.0482617	group_396	0.811068	group_396	0.0112423	group_396	0.955617
group_499	-0.369791	group_499	0.000679598	group_499	-0.506037	group_157	2.7e-06	group_499	-0.581217	group_557	1.28e-08	group_499	0.0241121	group_397	0.412082	group_397	-0.247048	group_397	0.214119	group_397	-0.326659	group_397	0.0963063	group_397	-0.112423	group_397	0.576638	group_397	-0.0482617	group_397	0.811068	group_397	0.0112423	group_397	0.955617
group_500	-0.369791	group_500	0.000679598	group_500	-0.506037	group_164	2.7e-06	group_500	-0.581217	group_558	1.28e-08	group_500	0.0241121	group_398	0.412082	group_398	-0.247048	group_398	0.214119	group_398	-0.326659	group_398	0.0963063	group_398	-0.112423	group_398	0.576638	group_398	-0.0482617	group_398	0.811068	group_398	0.0112423	group_398	0.955617
group_501	-0.369791	group_501	0.000679598	group_501	-0.506037	group_302	2.7e-06	group_501	-0.581217	group_559	1.28e-08	group_501	0.0241121	group_399	0.412082	group_399	-0.247048	group_399	0.214119	group_399	-0.326659	group_399	0.0963063	group_399	-0.112423	group_399	0.576638	group_399	-0.0482617	group_399	0.811068	group_399	0.0112423	group_399	0.955617
group_502	-0.369791	group_502	0.000679598	group_502	-0.506037	group_304	2.7e-06	group_502	-0.581217	group_560	1.28e-08	group_502	0.0241121	group_4	0.856887	group_4	-0.0898191	group_4	0.655935	group_4	0.138472	group_4	0.490945	group_4	-0.148034	group_4	0.461192	group_4	-0.363137	group_4	0.0626374	group_4	-0.422955	group_4	0.0279435
group_503	-0.369791	group_503	0.000679598	group_503	-0.506037	group_326	2.7e-06	group_503	-0.581217	group_561	1.28e-08	group_503	0.0241121	group_40	0.173358	group_40	-0.289418	group_40	0.143126	group_40	-0.389773	group_40	0.0444555	group_40	-0.458131	group_40	0.0162548	group_40	-0.10351	group_40	0.607402	group_40	0.0241121	group_40	0.904975
group_504	-0.369791	group_504	0.000679598	group_504	-0.506037	group_327	2.7e-06	group_504	-0.581217	group_562	1.28e-08	group_504	0.0241121	group_400	0.412082	group_400	-0.247048	group_400	0.214119	group_400	-0.326659	group_400	0.0963063	group_400	-0.112423	group_400	0.576638	group_400	-0.0482617	group_400	0.811068	group_400	0.0112423	group_400	0.955617
group_505	-0.369791	group_505	0.000679598	group_505	-0.506037	group_328	2.7e-06	group_505	-0.581217	group_563	1.28e-08	group_505	0.0241121	group_402	0.185711	group_402	-0.225285	group_402	0.258551	group_402	-0.171624	group_402	0.392019	group_402	-0.152499	group_402	0.447632	group_402	4.16e-21	group_402	1	group_402	0.0953116	group_402	0.636286
fic	-0.369791	fic	0.000679598	fic	-0.506037	group_329	2.7e-06	fic	-0.581217	xerC_3	1.28e-08	fic	0.0241121	group_403	0.185711	group_403	-0.225285	group_403	0.258551	group_403	-0.171624	group_403	0.392019	group_403	-0.152499	group_403	0.447632	group_403	4.16e-21	group_403	1	group_403	0.0953116	group_403	0.636286
group_507	-0.369791	group_507	0.000679598	group_507	-0.506037	group_330	2.7e-06	group_507	-0.581217	group_565	1.28e-08	group_507	0.0241121	group_405	0.185711	group_405	-0.225285	group_405	0.258551	group_405	-0.171624	group_405	0.392019	group_405	-0.152499	group_405	0.447632	group_405	4.16e-21	group_405	1	group_405	0.0953116	group_405	0.636286
group_508	-0.369791	group_508	0.000679598	group_508	-0.506037	group_331	2.7e-06	group_508	-0.581217	immR	1.28e-08	group_508	0.0241121	group_406	0.412082	group_406	-0.247048	group_406	0.214119	group_406	-0.326659	group_406	0.0963063	group_406	-0.112423	group_406	0.576638	group_406	-0.0482617	group_406	0.811068	group_406	0.0112423	group_406	0.955617
group_509	-0.369791	group_509	0.000679598	group_509	-0.506037	group_332	2.7e-06	group_509	-0.581217	group_567	1.28e-08	group_509	0.0241121	group_407	0.412082	group_407	-0.247048	group_407	0.214119	group_407	-0.326659	group_407	0.0963063	group_407	-0.112423	group_407	0.576638	group_407	-0.0482617	group_407	0.811068	group_407	0.0112423	group_407	0.955617
group_510	-0.369791	group_510	0.000679598	group_510	-0.506037	group_333	2.7e-06	group_510	-0.581217	group_568	1.28e-08	group_510	0.0241121	group_408	0.358448	group_408	-0.0332165	group_408	0.869357	group_408	0.0161029	group_408	0.936461	group_408	-0.19112	group_408	0.339609	group_408	0.0482617	group_408	0.811068	group_408	0.140529	group_408	0.484464
group_511	-0.369791	group_511	0.000679598	group_511	-0.506037	group_334	2.7e-06	group_511	-0.581217	lacC_4	1.28e-08	group_511	0.0241121	group_409	0.185711	group_409	-0.225285	group_409	0.258551	group_409	-0.171624	group_409	0.392019	group_409	-0.152499	group_409	0.447632	group_409	4.16e-21	group_409	1	group_409	0.0953116	group_409	0.636286
group_512	-0.369791	group_512	0.000679598	group_512	-0.506037	group_335	2.7e-06	group_512	-0.581217	group_570	1.28e-08	group_512	0.0241121	group_410	0.185711	group_410	-0.225285	group_410	0.258551	group_410	-0.171624	group_410	0.392019	group_410	-0.152499	group_410	0.447632	group_410	4.16e-21	group_410	1	group_410	0.0953116	group_410	0.636286
group_513	-0.369791	group_513	0.000679598	group_513	-0.506037	group_637	8.65e-06	group_513	-0.581217	group_596	1.28e-08	group_513	0.0241121	group_411	0.856887	group_411	0.121061	group_411	0.547506	group_411	0.0216363	group_411	0.914695	group_411	-0.148034	group_411	0.461192	group_411	-0.0907841	group_411	0.652466	group_411	-0.13746	group_411	0.49415
group_514	-0.369791	group_514	0.000679598	group_514	-0.506037	group_92	2.18e-05	group_514	-0.581217	group_597	1.28e-08	group_514	0.0241121	group_412	0.173358	group_412	-0.289418	group_412	0.143126	group_412	-0.389773	group_412	0.0444555	group_412	-0.458131	group_412	0.0162548	group_412	-0.10351	group_412	0.607402	group_412	0.0241121	group_412	0.904975
group_515	-0.369791	group_515	0.000679598	group_515	-0.506037	group_94	2.18e-05	group_515	-0.581217	group_598	1.28e-08	group_515	0.0241121	group_413	0.173358	group_413	-0.289418	group_413	0.143126	group_413	-0.389773	group_413	0.0444555	group_413	-0.458131	group_413	0.0162548	group_413	-0.10351	group_413	0.607402	group_413	0.0241121	group_413	0.904975
group_516	-0.369791	group_516	0.000679598	group_516	-0.506037	group_347	2.75e-05	group_516	-0.581217	group_599	1.28e-08	group_516	0.0241121	group_414	0.173358	group_414	-0.289418	group_414	0.143126	group_414	-0.389773	group_414	0.0444555	group_414	-0.458131	group_414	0.0162548	group_414	-0.10351	group_414	0.607402	group_414	0.0241121	group_414	0.904975
group_517	-0.369791	group_517	0.000679598	group_517	-0.506037	group_349	2.75e-05	group_517	-0.581217	group_600	1.28e-08	group_517	0.0241121	group_415	0.173358	group_415	-0.289418	group_415	0.143126	group_415	-0.389773	group_415	0.0444555	group_415	-0.458131	group_415	0.0162548	group_415	-0.10351	group_415	0.607402	group_415	0.0241121	group_415	0.904975
group_518	-0.369791	group_518	0.000679598	group_518	-0.506037	group_105	7.15e-05	group_518	-0.581217	group_601	1.28e-08	group_518	0.0241121	group_416	0.173358	group_416	-0.289418	group_416	0.143126	group_416	-0.389773	group_416	0.0444555	group_416	-0.458131	group_416	0.0162548	group_416	-0.10351	group_416	0.607402	group_416	0.0241121	group_416	0.904975
group_519	-0.369791	group_519	0.000679598	group_519	-0.506037	group_183	7.15e-05	group_519	-0.581217	group_602	1.28e-08	group_519	0.0241121	group_417	0.173358	group_417	-0.289418	group_417	0.143126	group_417	-0.389773	group_417	0.0444555	group_417	-0.458131	group_417	0.0162548	group_417	-0.10351	group_417	0.607402	group_417	0.0241121	group_417	0.904975
group_520	-0.369791	group_520	0.000679598	group_520	-0.506037	group_23	0.000487655	group_520	-0.581217	group_603	1.28e-08	group_520	0.0241121	group_418	0.173358	group_418	-0.289418	group_418	0.143126	group_418	-0.389773	group_418	0.0444555	group_418	-0.458131	group_418	0.0162548	group_418	-0.10351	group_418	0.607402	group_418	0.0241121	group_418	0.904975
group_521	-0.369791	group_521	0.000679598	group_521	-0.506037	group_252	0.000488325	group_521	-0.581217	group_604	1.28e-08	group_521	0.0241121	group_419	0.173358	group_419	-0.289418	group_419	0.143126	group_419	-0.389773	group_419	0.0444555	group_419	-0.458131	group_419	0.0162548	group_419	-0.10351	group_419	0.607402	group_419	0.0241121	group_419	0.904975
intS	-0.369791	intS	0.000679598	intS	-0.506037	group_402	0.000488325	intS	-0.581217	group_605	1.28e-08	intS	0.0241121	group_42	0.173358	group_42	0.289418	group_42	0.143126	group_42	0.389773	group_42	0.0444555	group_42	0.458131	group_42	0.0162548	group_42	0.10351	group_42	0.607402	group_42	-0.0241121	group_42	0.904975
group_523	-0.369791	group_523	0.000679598	group_523	-0.506037	group_403	0.000488325	group_523	-0.581217	group_606	1.28e-08	group_523	0.0241121	group_420	0.173358	group_420	-0.289418	group_420	0.143126	group_420	-0.389773	group_420	0.0444555	group_420	-0.458131	group_420	0.0162548	group_420	-0.10351	group_420	0.607402	group_420	0.0241121	group_420	0.904975
group_524	-0.369791	group_524	0.000679598	group_524	-0.506037	lexA_1	0.000488325	group_524	-0.581217	group_607	1.28e-08	group_524	0.0241121	group_421	0.173358	group_421	-0.289418	group_421	0.143126	group_421	-0.389773	group_421	0.0444555	group_421	-0.458131	group_421	0.0162548	group_421	-0.10351	group_421	0.607402	group_421	0.0241121	group_421	0.904975
group_525	-0.369791	group_525	0.000679598	group_525	-0.506037	group_405	0.000488325	group_525	-0.581217	group_608	1.28e-08	group_525	0.0241121	group_422	0.173358	group_422	-0.289418	group_422	0.143126	group_422	-0.389773	group_422	0.0444555	group_422	-0.458131	group_422	0.0162548	group_422	-0.10351	group_422	0.607402	group_422	0.0241121	group_422	0.904975
group_526	-0.369791	group_526	0.000679598	group_526	-0.506037	group_409	0.000488325	group_526	-0.581217	group_609	1.28e-08	group_526	0.0241121	group_423	0.173358	group_423	-0.289418	group_423	0.143126	group_423	-0.389773	group_423	0.0444555	group_423	-0.458131	group_423	0.0162548	group_423	-0.10351	group_423	0.607402	group_423	0.0241121	group_423	0.904975
group_527	-0.369791	group_527	0.000679598	group_527	-0.506037	group_410	0.000488325	group_527	-0.581217	group_610	1.28e-08	group_527	0.0241121	group_424	0.173358	group_424	-0.289418	group_424	0.143126	group_424	-0.389773	group_424	0.0444555	group_424	-0.458131	group_424	0.0162548	group_424	-0.10351	group_424	0.607402	group_424	0.0241121	group_424	0.904975
group_528	-0.369791	group_528	0.000679598	group_528	-0.506037	group_169	0.000578687	group_528	-0.581217	group_611	1.28e-08	group_528	0.0241121	group_425	0.173358	group_425	-0.289418	group_425	0.143126	group_425	-0.389773	group_425	0.0444555	group_425	-0.458131	group_425	0.0162548	group_425	-0.10351	group_425	0.607402	group_425	0.0241121	group_425	0.904975
group_529	-0.369791	group_529	0.000679598	group_529	-0.506037	group_571	0.000578687	group_529	-0.581217	group_612	1.28e-08	group_529	0.0241121	group_426	0.173358	group_426	-0.289418	group_426	0.143126	group_426	-0.389773	group_426	0.0444555	group_426	-0.458131	group_426	0.0162548	group_426	-0.10351	group_426	0.607402	group_426	0.0241121	group_426	0.904975
group_530	-0.369791	group_530	0.000679598	group_530	-0.506037	group_572	0.000578687	group_530	-0.581217	group_613	1.28e-08	group_530	0.0241121	group_427	0.173358	group_427	-0.289418	group_427	0.143126	group_427	-0.389773	group_427	0.0444555	group_427	-0.458131	group_427	0.0162548	group_427	-0.10351	group_427	0.607402	group_427	0.0241121	group_427	0.904975
group_531	-0.369791	group_531	0.000679598	group_531	-0.506037	group_573	0.000578687	group_531	-0.581217	group_614	1.28e-08	group_531	0.0241121	group_428	0.173358	group_428	-0.289418	group_428	0.143126	group_428	-0.389773	group_428	0.0444555	group_428	-0.458131	group_428	0.0162548	group_428	-0.10351	group_428	0.607402	group_428	0.0241121	group_428	0.904975
group_532	-0.369791	group_532	0.000679598	group_532	-0.506037	group_574	0.000578687	group_532	-0.581217	group_615	1.28e-08	group_532	0.0241121	group_429	0.173358	group_429	-0.289418	group_429	0.143126	group_429	-0.389773	group_429	0.0444555	group_429	-0.458131	group_429	0.0162548	group_429	-0.10351	group_429	0.607402	group_429	0.0241121	group_429	0.904975
group_533	-0.369791	group_533	0.000679598	group_533	-0.506037	group_575	0.000578687	group_533	-0.581217	group_616	1.28e-08	group_533	0.0241121	group_430	0.173358	group_430	-0.289418	group_430	0.143126	group_430	-0.389773	group_430	0.0444555	group_430	-0.458131	group_430	0.0162548	group_430	-0.10351	group_430	0.607402	group_430	0.0241121	group_430	0.904975
group_534	-0.369791	group_534	0.000679598	group_534	-0.506037	group_576	0.000578687	group_534	-0.581217	group_617	1.28e-08	group_534	0.0241121	group_431	0.173358	group_431	-0.289418	group_431	0.143126	group_431	-0.389773	group_431	0.0444555	group_431	-0.458131	group_431	0.0162548	group_431	-0.10351	group_431	0.607402	group_431	0.0241121	group_431	0.904975
group_535	-0.369791	group_535	0.000679598	group_535	-0.506037	group_577	0.000578687	group_535	-0.581217	group_618	1.28e-08	group_535	0.0241121	group_432	0.173358	group_432	-0.289418	group_432	0.143126	group_432	-0.389773	group_432	0.0444555	group_432	-0.458131	group_432	0.0162548	group_432	-0.10351	group_432	0.607402	group_432	0.0241121	group_432	0.904975
dnaG_1	-0.369791	dnaG_1	0.000679598	dnaG_1	-0.506037	group_578	0.000578687	dnaG_1	-0.581217	uvrB_2	1.28e-08	dnaG_1	0.0241121	group_433	0.173358	group_433	-0.289418	group_433	0.143126	group_433	-0.389773	group_433	0.0444555	group_433	-0.458131	group_433	0.0162548	group_433	-0.10351	group_433	0.607402	group_433	0.0241121	group_433	0.904975
group_537	-0.369791	group_537	0.000679598	group_537	-0.506037	group_579	0.000578687	group_537	-0.581217	group_620	1.28e-08	group_537	0.0241121	group_434	0.173358	group_434	-0.289418	group_434	0.143126	group_434	-0.389773	group_434	0.0444555	group_434	-0.458131	group_434	0.0162548	group_434	-0.10351	group_434	0.607402	group_434	0.0241121	group_434	0.904975
group_538	-0.369791	group_538	0.000679598	group_538	-0.506037	group_580	0.000578687	group_538	-0.581217	group_621	1.28e-08	group_538	0.0241121	group_436	0.173358	group_436	-0.289418	group_436	0.143126	group_436	-0.389773	group_436	0.0444555	group_436	-0.458131	group_436	0.0162548	group_436	-0.10351	group_436	0.607402	group_436	0.0241121	group_436	0.904975
group_539	-0.369791	group_539	0.000679598	group_539	-0.506037	group_581	0.000578687	group_539	-0.581217	group_622	1.28e-08	group_539	0.0241121	group_437	0.173358	group_437	-0.289418	group_437	0.143126	group_437	-0.389773	group_437	0.0444555	group_437	-0.458131	group_437	0.0162548	group_437	-0.10351	group_437	0.607402	group_437	0.0241121	group_437	0.904975
group_540	-0.369791	group_540	0.000679598	group_540	-0.506037	group_582	0.000578687	group_540	-0.581217	group_623	1.28e-08	group_540	0.0241121	group_438	0.173358	group_438	-0.289418	group_438	0.143126	group_438	-0.389773	group_438	0.0444555	group_438	-0.458131	group_438	0.0162548	group_438	-0.10351	group_438	0.607402	group_438	0.0241121	group_438	0.904975
group_541	-0.369791	group_541	0.000679598	group_541	-0.506037	group_583	0.000578687	group_541	-0.581217	group_624	1.28e-08	group_541	0.0241121	group_44	0.173358	group_44	-0.289418	group_44	0.143126	group_44	-0.389773	group_44	0.0444555	group_44	-0.458131	group_44	0.0162548	group_44	-0.10351	group_44	0.607402	group_44	0.0241121	group_44	0.904975
group_542	-0.369791	group_542	0.000679598	group_542	-0.506037	group_584	0.000578687	group_542	-0.581217	group_625	1.28e-08	group_542	0.0241121	group_440	0.173358	group_440	-0.289418	group_440	0.143126	group_440	-0.389773	group_440	0.0444555	group_440	-0.458131	group_440	0.0162548	group_440	-0.10351	group_440	0.607402	group_440	0.0241121	group_440	0.904975
group_543	-0.369791	group_543	0.000679598	group_543	-0.506037	group_585	0.000578687	group_543	-0.581217	group_626	1.28e-08	group_543	0.0241121	group_441	0.173358	group_441	-0.289418	group_441	0.143126	group_441	-0.389773	group_441	0.0444555	group_441	-0.458131	group_441	0.0162548	group_441	-0.10351	group_441	0.607402	group_441	0.0241121	group_441	0.904975
group_544	-0.369791	group_544	0.000679598	group_544	-0.506037	group_586	0.000578687	group_544	-0.581217	group_627	1.28e-08	group_544	0.0241121	group_442	0.173358	group_442	-0.289418	group_442	0.143126	group_442	-0.389773	group_442	0.0444555	group_442	-0.458131	group_442	0.0162548	group_442	-0.10351	group_442	0.607402	group_442	0.0241121	group_442	0.904975
group_545	-0.369791	group_545	0.000679598	group_545	-0.506037	group_587	0.000578687	group_545	-0.581217	group_628	1.28e-08	group_545	0.0241121	group_443	0.173358	group_443	-0.289418	group_443	0.143126	group_443	-0.389773	group_443	0.0444555	group_443	-0.458131	group_443	0.0162548	group_443	-0.10351	group_443	0.607402	group_443	0.0241121	group_443	0.904975
group_546	-0.369791	group_546	0.000679598	group_546	-0.506037	group_588	0.000578687	group_546	-0.581217	group_629	1.28e-08	group_546	0.0241121	group_444	0.173358	group_444	-0.289418	group_444	0.143126	group_444	-0.389773	group_444	0.0444555	group_444	-0.458131	group_444	0.0162548	group_444	-0.10351	group_444	0.607402	group_444	0.0241121	group_444	0.904975
group_547	-0.369791	group_547	0.000679598	group_547	-0.506037	group_589	0.000578687	group_547	-0.581217	dexB_1	1.28e-08	group_547	0.0241121	group_445	0.173358	group_445	-0.289418	group_445	0.143126	group_445	-0.389773	group_445	0.0444555	group_445	-0.458131	group_445	0.0162548	group_445	-0.10351	group_445	0.607402	group_445	0.0241121	group_445	0.904975
group_548	-0.369791	group_548	0.000679598	group_548	-0.506037	group_590	0.000578687	group_548	-0.581217	group_630	1.28e-08	group_548	0.0241121	group_446	0.173358	group_446	-0.289418	group_446	0.143126	group_446	-0.389773	group_446	0.0444555	group_446	-0.458131	group_446	0.0162548	group_446	-0.10351	group_446	0.607402	group_446	0.0241121	group_446	0.904975
group_549	-0.369791	group_549	0.000679598	group_549	-0.506037	group_591	0.000578687	group_549	-0.581217	group_631	1.28e-08	group_549	0.0241121	group_447	0.173358	group_447	-0.289418	group_447	0.143126	group_447	-0.389773	group_447	0.0444555	group_447	-0.458131	group_447	0.0162548	group_447	-0.10351	group_447	0.607402	group_447	0.0241121	group_447	0.904975
group_550	-0.369791	group_550	0.000679598	group_550	-0.506037	group_592	0.000578687	group_550	-0.581217	group_632	1.28e-08	group_550	0.0241121	group_448	0.173358	group_448	-0.289418	group_448	0.143126	group_448	-0.389773	group_448	0.0444555	group_448	-0.458131	group_448	0.0162548	group_448	-0.10351	group_448	0.607402	group_448	0.0241121	group_448	0.904975
group_551	-0.369791	group_551	0.000679598	group_551	-0.506037	group_593	0.000578687	group_551	-0.581217	group_638	1.28e-08	group_551	0.0241121	group_449	0.173358	group_449	-0.289418	group_449	0.143126	group_449	-0.389773	group_449	0.0444555	group_449	-0.458131	group_449	0.0162548	group_449	-0.10351	group_449	0.607402	group_449	0.0241121	group_449	0.904975
group_552	-0.369791	group_552	0.000679598	group_552	-0.506037	group_594	0.000578687	group_552	-0.581217	group_639	1.28e-08	group_552	0.0241121	group_450	0.173358	group_450	-0.289418	group_450	0.143126	group_450	-0.389773	group_450	0.0444555	group_450	-0.458131	group_450	0.0162548	group_450	-0.10351	group_450	0.607402	group_450	0.0241121	group_450	0.904975
group_553	-0.369791	group_553	0.000679598	group_553	-0.506037	group_595	0.000578687	group_553	-0.581217	group_640	1.28e-08	group_553	0.0241121	group_451	0.173358	group_451	-0.289418	group_451	0.143126	group_451	-0.389773	group_451	0.0444555	group_451	-0.458131	group_451	0.0162548	group_451	-0.10351	group_451	0.607402	group_451	0.0241121	group_451	0.904975
group_554	-0.369791	group_554	0.000679598	group_554	-0.506037	group_633	0.000578687	group_554	-0.581217	group_641	1.28e-08	group_554	0.0241121	group_452	0.173358	group_452	-0.289418	group_452	0.143126	group_452	-0.389773	group_452	0.0444555	group_452	-0.458131	group_452	0.0162548	group_452	-0.10351	group_452	0.607402	group_452	0.0241121	group_452	0.904975
group_555	-0.369791	group_555	0.000679598	group_555	-0.506037	group_634	0.000578687	group_555	-0.581217	group_642	1.28e-08	group_555	0.0241121	group_453	0.173358	group_453	-0.289418	group_453	0.143126	group_453	-0.389773	group_453	0.0444555	group_453	-0.458131	group_453	0.0162548	group_453	-0.10351	group_453	0.607402	group_453	0.0241121	group_453	0.904975
group_556	-0.369791	group_556	0.000679598	group_556	-0.506037	group_635	0.000578687	group_556	-0.581217	group_645	1.28e-08	group_556	0.0241121	group_454	0.173358	group_454	-0.289418	group_454	0.143126	group_454	-0.389773	group_454	0.0444555	group_454	-0.458131	group_454	0.0162548	group_454	-0.10351	group_454	0.607402	group_454	0.0241121	group_454	0.904975
group_557	-0.369791	group_557	0.000679598	group_557	-0.506037	group_636	0.000578687	group_557	-0.581217	group_152	1.74e-08	group_557	0.0241121	group_455	0.173358	group_455	-0.289418	group_455	0.143126	group_455	-0.389773	group_455	0.0444555	group_455	-0.458131	group_455	0.0162548	group_455	-0.10351	group_455	0.607402	group_455	0.0241121	group_455	0.904975
group_558	-0.369791	group_558	0.000679598	group_558	-0.506037	group_643	0.000578687	group_558	-0.581217	group_156	1.74e-08	group_558	0.0241121	group_456	0.173358	group_456	-0.289418	group_456	0.143126	group_456	-0.389773	group_456	0.0444555	group_456	-0.458131	group_456	0.0162548	group_456	-0.10351	group_456	0.607402	group_456	0.0241121	group_456	0.904975
group_559	-0.369791	group_559	0.000679598	group_559	-0.506037	group_644	0.000578687	group_559	-0.581217	group_157	1.74e-08	group_559	0.0241121	group_457	0.173358	group_457	-0.289418	group_457	0.143126	group_457	-0.389773	group_457	0.0444555	group_457	-0.458131	group_457	0.0162548	group_457	-0.10351	group_457	0.607402	group_457	0.0241121	group_457	0.904975
group_560	-0.369791	group_560	0.000679598	group_560	-0.506037	group_78	0.000578687	group_560	-0.581217	group_164	1.74e-08	group_560	0.0241121	group_458	0.173358	group_458	-0.289418	group_458	0.143126	group_458	-0.389773	group_458	0.0444555	group_458	-0.458131	group_458	0.0162548	group_458	-0.10351	group_458	0.607402	group_458	0.0241121	group_458	0.904975
group_561	-0.369791	group_561	0.000679598	group_561	-0.506037	hsdR	0.000609091	group_561	-0.581217	group_302	1.74e-08	group_561	0.0241121	group_459	0.320887	group_459	-0.196909	group_459	0.324901	group_459	-0.153324	group_459	0.44515	group_459	-0.57639	group_459	0.00165094	group_459	-0.123718	group_459	0.538682	group_459	-0.115278	group_459	0.566934
group_562	-0.369791	group_562	0.000679598	group_562	-0.506037	deoB_1	0.000615647	group_562	-0.581217	group_304	1.74e-08	group_562	0.0241121	group_46	0.173358	group_46	0.289418	group_46	0.143126	group_46	0.389773	group_46	0.0444555	group_46	0.458131	group_46	0.0162548	group_46	0.10351	group_46	0.607402	group_46	-0.0241121	group_46	0.904975
group_563	-0.369791	group_563	0.000679598	group_563	-0.506037	group_459	0.000615647	group_563	-0.581217	group_326	1.74e-08	group_563	0.0241121	group_460	0.320887	group_460	-0.00532186	group_460	0.978982	group_460	0.00589706	group_460	0.976711	group_460	-0.317015	group_460	0.10714	group_460	-0.123718	group_460	0.538682	group_460	-0.115278	group_460	0.566934
xerC_3	-0.369791	xerC_3	0.000679598	xerC_3	-0.506037	group_141	0.00148747	xerC_3	-0.581217	group_327	1.74e-08	xerC_3	0.0241121	group_461	0.173358	group_461	-0.289418	group_461	0.143126	group_461	-0.389773	group_461	0.0444555	group_461	-0.458131	group_461	0.0162548	group_461	-0.10351	group_461	0.607402	group_461	0.0241121	group_461	0.904975
group_565	-0.369791	group_565	0.000679598	group_565	-0.506037	group_142	0.00148747	group_565	-0.581217	group_328	1.74e-08	group_565	0.0241121	group_462	0.173358	group_462	-0.289418	group_462	0.143126	group_462	-0.389773	group_462	0.0444555	group_462	-0.458131	group_462	0.0162548	group_462	-0.10351	group_462	0.607402	group_462	0.0241121	group_462	0.904975
immR	-0.369791	immR	0.000679598	immR	-0.506037	group_324	0.00148747	immR	-0.581217	group_329	1.74e-08	immR	0.0241121	group_463	0.173358	group_463	-0.289418	group_463	0.143126	group_463	-0.389773	group_463	0.0444555	group_463	-0.458131	group_463	0.0162548	group_463	-0.10351	group_463	0.607402	group_463	0.0241121	group_463	0.904975
group_567	-0.369791	group_567	0.000679598	group_567	-0.506037	group_325	0.00148747	group_567	-0.581217	group_330	1.74e-08	group_567	0.0241121	group_464	0.173358	group_464	-0.289418	group_464	0.143126	group_464	-0.389773	group_464	0.0444555	group_464	-0.458131	group_464	0.0162548	group_464	-0.10351	group_464	0.607402	group_464	0.0241121	group_464	0.904975
group_568	-0.369791	group_568	0.000679598	group_568	-0.506037	group_9	0.00148747	group_568	-0.581217	group_331	1.74e-08	group_568	0.0241121	group_465	0.173358	group_465	-0.289418	group_465	0.143126	group_465	-0.389773	group_465	0.0444555	group_465	-0.458131	group_465	0.0162548	group_465	-0.10351	group_465	0.607402	group_465	0.0241121	group_465	0.904975
lacC_4	-0.369791	lacC_4	0.000679598	lacC_4	-0.506037	group_25	0.00148747	lacC_4	-0.581217	group_332	1.74e-08	lacC_4	0.0241121	group_466	0.173358	group_466	-0.289418	group_466	0.143126	group_466	-0.389773	group_466	0.0444555	group_466	-0.458131	group_466	0.0162548	group_466	-0.10351	group_466	0.607402	group_466	0.0241121	group_466	0.904975
group_570	-0.369791	group_570	0.000679598	group_570	-0.506037	group_368	0.00148747	group_570	-0.581217	group_333	1.74e-08	group_570	0.0241121	group_467	0.173358	group_467	-0.289418	group_467	0.143126	group_467	-0.389773	group_467	0.0444555	group_467	-0.458131	group_467	0.0162548	group_467	-0.10351	group_467	0.607402	group_467	0.0241121	group_467	0.904975
group_596	-0.369791	group_596	0.000679598	group_596	-0.506037	group_369	0.00148747	group_596	-0.581217	group_334	1.74e-08	group_596	0.0241121	group_468	0.173358	group_468	-0.289418	group_468	0.143126	group_468	-0.389773	group_468	0.0444555	group_468	-0.458131	group_468	0.0162548	group_468	-0.10351	group_468	0.607402	group_468	0.0241121	group_468	0.904975
group_597	-0.369791	group_597	0.000679598	group_597	-0.506037	nisB_2	0.00148747	group_597	-0.581217	group_335	1.74e-08	group_597	0.0241121	group_469	0.173358	group_469	-0.289418	group_469	0.143126	group_469	-0.389773	group_469	0.0444555	group_469	-0.458131	group_469	0.0162548	group_469	-0.10351	group_469	0.607402	group_469	0.0241121	group_469	0.904975
group_598	-0.369791	group_598	0.000679598	group_598	-0.506037	nsuA	0.00148747	group_598	-0.581217	group_182	1.97e-08	group_598	0.0241121	group_471	0.173358	group_471	-0.289418	group_471	0.143126	group_471	-0.389773	group_471	0.0444555	group_471	-0.458131	group_471	0.0162548	group_471	-0.10351	group_471	0.607402	group_471	0.0241121	group_471	0.904975
group_599	-0.369791	group_599	0.000679598	group_599	-0.506037	group_372	0.00148747	group_599	-0.581217	group_197	1.97e-08	group_599	0.0241121	group_472	0.173358	group_472	-0.289418	group_472	0.143126	group_472	-0.389773	group_472	0.0444555	group_472	-0.458131	group_472	0.0162548	group_472	-0.10351	group_472	0.607402	group_472	0.0241121	group_472	0.904975
group_600	-0.369791	group_600	0.000679598	group_600	-0.506037	Int.Tn	0.00148747	group_600	-0.581217	group_637	5.25e-08	group_600	0.0241121	group_473	0.173358	group_473	-0.289418	group_473	0.143126	group_473	-0.389773	group_473	0.0444555	group_473	-0.458131	group_473	0.0162548	group_473	-0.10351	group_473	0.607402	group_473	0.0241121	group_473	0.904975
group_601	-0.369791	group_601	0.000679598	group_601	-0.506037	group_374	0.00148747	group_601	-0.581217	group_2447	1.48e-07	group_601	0.0241121	group_474	0.173358	group_474	-0.289418	group_474	0.143126	group_474	-0.389773	group_474	0.0444555	group_474	-0.458131	group_474	0.0162548	group_474	-0.10351	group_474	0.607402	group_474	0.0241121	group_474	0.904975
group_602	-0.369791	group_602	0.000679598	group_602	-0.506037	group_375	0.00148747	group_602	-0.581217	group_347	4.13e-07	group_602	0.0241121	group_475	0.173358	group_475	-0.289418	group_475	0.143126	group_475	-0.389773	group_475	0.0444555	group_475	-0.458131	group_475	0.0162548	group_475	-0.10351	group_475	0.607402	group_475	0.0241121	group_475	0.904975
group_603	-0.369791	group_603	0.000679598	group_603	-0.506037	group_376	0.00148747	group_603	-0.581217	group_349	4.13e-07	group_603	0.0241121	group_476	0.173358	group_476	-0.289418	group_476	0.143126	group_476	-0.389773	group_476	0.0444555	group_476	-0.458131	group_476	0.0162548	group_476	-0.10351	group_476	0.607402	group_476	0.0241121	group_476	0.904975
group_604	-0.369791	group_604	0.000679598	group_604	-0.506037	group_377	0.00148747	group_604	-0.581217	group_353	5.56e-07	group_604	0.0241121	group_477	0.173358	group_477	-0.289418	group_477	0.143126	group_477	-0.389773	group_477	0.0444555	group_477	-0.458131	group_477	0.0162548	group_477	-0.10351	group_477	0.607402	group_477	0.0241121	group_477	0.904975
group_605	-0.369791	group_605	0.000679598	group_605	-0.506037	tet.M.	0.00148747	group_605	-0.581217	group_101	2.01e-06	group_605	0.0241121	group_478	0.173358	group_478	-0.289418	group_478	0.143126	group_478	-0.389773	group_478	0.0444555	group_478	-0.458131	group_478	0.0162548	group_478	-0.10351	group_478	0.607402	group_478	0.0241121	group_478	0.904975
group_606	-0.369791	group_606	0.000679598	group_606	-0.506037	group_379	0.00148747	group_606	-0.581217	ndhB_2	2.01e-06	group_606	0.0241121	group_479	0.173358	group_479	-0.289418	group_479	0.143126	group_479	-0.389773	group_479	0.0444555	group_479	-0.458131	group_479	0.0162548	group_479	-0.10351	group_479	0.607402	group_479	0.0241121	group_479	0.904975
group_607	-0.369791	group_607	0.000679598	group_607	-0.506037	group_380	0.00148747	group_607	-0.581217	group_355	2.01e-06	group_607	0.0241121	group_481	0.173358	group_481	-0.289418	group_481	0.143126	group_481	-0.389773	group_481	0.0444555	group_481	-0.458131	group_481	0.0162548	group_481	-0.10351	group_481	0.607402	group_481	0.0241121	group_481	0.904975
group_608	-0.369791	group_608	0.000679598	group_608	-0.506037	group_381	0.00148747	group_608	-0.581217	rpsG_2	2.01e-06	group_608	0.0241121	group_482	0.173358	group_482	-0.289418	group_482	0.143126	group_482	-0.389773	group_482	0.0444555	group_482	-0.458131	group_482	0.0162548	group_482	-0.10351	group_482	0.607402	group_482	0.0241121	group_482	0.904975
group_609	-0.369791	group_609	0.000679598	group_609	-0.506037	group_382	0.00148747	group_609	-0.581217	group_357	2.01e-06	group_609	0.0241121	group_483	0.173358	group_483	-0.289418	group_483	0.143126	group_483	-0.389773	group_483	0.0444555	group_483	-0.458131	group_483	0.0162548	group_483	-0.10351	group_483	0.607402	group_483	0.0241121	group_483	0.904975
group_610	-0.369791	group_610	0.000679598	group_610	-0.506037	group_383	0.00148747	group_610	-0.581217	psbA3	2.01e-06	group_610	0.0241121	group_484	0.173358	group_484	-0.289418	group_484	0.143126	group_484	-0.389773	group_484	0.0444555	group_484	-0.458131	group_484	0.0162548	group_484	-0.10351	group_484	0.607402	group_484	0.0241121	group_484	0.904975
group_611	-0.369791	group_611	0.000679598	group_611	-0.506037	group_384	0.00148747	group_611	-0.581217	group_166	2.04e-06	group_611	0.0241121	group_486	0.173358	group_486	-0.289418	group_486	0.143126	group_486	-0.389773	group_486	0.0444555	group_486	-0.458131	group_486	0.0162548	group_486	-0.10351	group_486	0.607402	group_486	0.0241121	group_486	0.904975
group_612	-0.369791	group_612	0.000679598	group_612	-0.506037	group_385	0.00148747	group_612	-0.581217	group_2	2.04e-06	group_612	0.0241121	group_487	0.173358	group_487	-0.289418	group_487	0.143126	group_487	-0.389773	group_487	0.0444555	group_487	-0.458131	group_487	0.0162548	group_487	-0.10351	group_487	0.607402	group_487	0.0241121	group_487	0.904975
group_613	-0.369791	group_613	0.000679598	group_613	-0.506037	group_386	0.00148747	group_613	-0.581217	group_299	2.04e-06	group_613	0.0241121	group_488	0.173358	group_488	-0.289418	group_488	0.143126	group_488	-0.389773	group_488	0.0444555	group_488	-0.458131	group_488	0.0162548	group_488	-0.10351	group_488	0.607402	group_488	0.0241121	group_488	0.904975
group_614	-0.369791	group_614	0.000679598	group_614	-0.506037	group_387	0.00148747	group_614	-0.581217	group_303	3.34e-06	group_614	0.0241121	group_489	0.173358	group_489	-0.289418	group_489	0.143126	group_489	-0.389773	group_489	0.0444555	group_489	-0.458131	group_489	0.0162548	group_489	-0.10351	group_489	0.607402	group_489	0.0241121	group_489	0.904975
group_615	-0.369791	group_615	0.000679598	group_615	-0.506037	group_388	0.00148747	group_615	-0.581217	group_16	1.38e-05	group_615	0.0241121	group_490	0.173358	group_490	-0.289418	group_490	0.143126	group_490	-0.389773	group_490	0.0444555	group_490	-0.458131	group_490	0.0162548	group_490	-0.10351	group_490	0.607402	group_490	0.0241121	group_490	0.904975
group_616	-0.369791	group_616	0.000679598	group_616	-0.506037	group_389	0.00148747	group_616	-0.581217	group_65	8.2e-05	group_616	0.0241121	group_491	0.173358	group_491	-0.289418	group_491	0.143126	group_491	-0.389773	group_491	0.0444555	group_491	-0.458131	group_491	0.0162548	group_491	-0.10351	group_491	0.607402	group_491	0.0241121	group_491	0.904975
group_617	-0.369791	group_617	0.000679598	group_617	-0.506037	group_390	0.00148747	group_617	-0.581217	group_169	0.000135654	group_617	0.0241121	group_492	0.173358	group_492	-0.289418	group_492	0.143126	group_492	-0.389773	group_492	0.0444555	group_492	-0.458131	group_492	0.0162548	group_492	-0.10351	group_492	0.607402	group_492	0.0241121	group_492	0.904975
group_618	-0.369791	group_618	0.000679598	group_618	-0.506037	group_391	0.00148747	group_618	-0.581217	group_571	0.000135654	group_618	0.0241121	group_493	0.173358	group_493	-0.289418	group_493	0.143126	group_493	-0.389773	group_493	0.0444555	group_493	-0.458131	group_493	0.0162548	group_493	-0.10351	group_493	0.607402	group_493	0.0241121	group_493	0.904975
uvrB_2	-0.369791	uvrB_2	0.000679598	uvrB_2	-0.506037	group_392	0.00148747	uvrB_2	-0.581217	group_572	0.000135654	uvrB_2	0.0241121	group_494	0.173358	group_494	-0.289418	group_494	0.143126	group_494	-0.389773	group_494	0.0444555	group_494	-0.458131	group_494	0.0162548	group_494	-0.10351	group_494	0.607402	group_494	0.0241121	group_494	0.904975
group_620	-0.369791	group_620	0.000679598	group_620	-0.506037	group_393	0.00148747	group_620	-0.581217	group_573	0.000135654	group_620	0.0241121	group_495	0.173358	group_495	-0.289418	group_495	0.143126	group_495	-0.389773	group_495	0.0444555	group_495	-0.458131	group_495	0.0162548	group_495	-0.10351	group_495	0.607402	group_495	0.0241121	group_495	0.904975
group_621	-0.369791	group_621	0.000679598	group_621	-0.506037	group_394	0.00148747	group_621	-0.581217	group_574	0.000135654	group_621	0.0241121	group_496	0.173358	group_496	-0.289418	group_496	0.143126	group_496	-0.389773	group_496	0.0444555	group_496	-0.458131	group_496	0.0162548	group_496	-0.10351	group_496	0.607402	group_496	0.0241121	group_496	0.904975
group_622	-0.369791	group_622	0.000679598	group_622	-0.506037	group_395	0.00148747	group_622	-0.581217	group_575	0.000135654	group_622	0.0241121	group_497	0.173358	group_497	-0.289418	group_497	0.143126	group_497	-0.389773	group_497	0.0444555	group_497	-0.458131	group_497	0.0162548	group_497	-0.10351	group_497	0.607402	group_497	0.0241121	group_497	0.904975
group_623	-0.369791	group_623	0.000679598	group_623	-0.506037	group_396	0.00148747	group_623	-0.581217	group_576	0.000135654	group_623	0.0241121	group_498	0.173358	group_498	-0.289418	group_498	0.143126	group_498	-0.389773	group_498	0.0444555	group_498	-0.458131	group_498	0.0162548	group_498	-0.10351	group_498	0.607402	group_498	0.0241121	group_498	0.904975
group_624	-0.369791	group_624	0.000679598	group_624	-0.506037	group_397	0.00148747	group_624	-0.581217	group_577	0.000135654	group_624	0.0241121	group_499	0.173358	group_499	-0.289418	group_499	0.143126	group_499	-0.389773	group_499	0.0444555	group_499	-0.458131	group_499	0.0162548	group_499	-0.10351	group_499	0.607402	group_499	0.0241121	group_499	0.904975
group_625	-0.369791	group_625	0.000679598	group_625	-0.506037	group_398	0.00148747	group_625	-0.581217	group_578	0.000135654	group_625	0.0241121	group_5	0.845941	group_5	0.0437559	group_5	0.828436	group_5	0.136131	group_5	0.498373	group_5	-0.0455677	group_5	0.821443	group_5	0.039123	group_5	0.846377	group_5	0.0455677	group_5	0.821443
group_626	-0.369791	group_626	0.000679598	group_626	-0.506037	group_399	0.00148747	group_626	-0.581217	group_579	0.000135654	group_626	0.0241121	group_50	0.526363	group_50	-0.300699	group_50	0.127493	group_50	-0.445708	group_50	0.0198045	group_50	0.232625	group_50	0.242942	group_50	0.181568	group_50	0.364735	group_50	0.148034	group_50	0.461192
group_627	-0.369791	group_627	0.000679598	group_627	-0.506037	group_400	0.00148747	group_627	-0.581217	group_580	0.000135654	group_627	0.0241121	group_500	0.173358	group_500	-0.289418	group_500	0.143126	group_500	-0.389773	group_500	0.0444555	group_500	-0.458131	group_500	0.0162548	group_500	-0.10351	group_500	0.607402	group_500	0.0241121	group_500	0.904975
group_628	-0.369791	group_628	0.000679598	group_628	-0.506037	group_406	0.00148747	group_628	-0.581217	group_581	0.000135654	group_628	0.0241121	group_501	0.173358	group_501	-0.289418	group_501	0.143126	group_501	-0.389773	group_501	0.0444555	group_501	-0.458131	group_501	0.0162548	group_501	-0.10351	group_501	0.607402	group_501	0.0241121	group_501	0.904975
group_629	-0.369791	group_629	0.000679598	group_629	-0.506037	group_407	0.00148747	group_629	-0.581217	group_582	0.000135654	group_629	0.0241121	group_502	0.173358	group_502	-0.289418	group_502	0.143126	group_502	-0.389773	group_502	0.0444555	group_502	-0.458131	group_502	0.0162548	group_502	-0.10351	group_502	0.607402	group_502	0.0241121	group_502	0.904975
dexB_1	-0.369791	dexB_1	0.000679598	dexB_1	-0.506037	queG_1	0.00148747	dexB_1	-0.581217	group_583	0.000135654	dexB_1	0.0241121	group_503	0.173358	group_503	-0.289418	group_503	0.143126	group_503	-0.389773	group_503	0.0444555	group_503	-0.458131	group_503	0.0162548	group_503	-0.10351	group_503	0.607402	group_503	0.0241121	group_503	0.904975
group_630	-0.369791	group_630	0.000679598	group_630	-0.506037	clpE_2	0.00148747	group_630	-0.581217	group_584	0.000135654	group_630	0.0241121	group_504	0.173358	group_504	-0.289418	group_504	0.143126	group_504	-0.389773	group_504	0.0444555	group_504	-0.458131	group_504	0.0162548	group_504	-0.10351	group_504	0.607402	group_504	0.0241121	group_504	0.904975
group_631	-0.369791	group_631	0.000679598	group_631	-0.506037	group_28	0.00171355	group_631	-0.581217	group_585	0.000135654	group_631	0.0241121	group_505	0.173358	group_505	-0.289418	group_505	0.143126	group_505	-0.389773	group_505	0.0444555	group_505	-0.458131	group_505	0.0162548	group_505	-0.10351	group_505	0.607402	group_505	0.0241121	group_505	0.904975
group_632	-0.369791	group_632	0.000679598	group_632	-0.506037	group_352	0.00221598	group_632	-0.581217	group_586	0.000135654	group_632	0.0241121	group_507	0.173358	group_507	-0.289418	group_507	0.143126	group_507	-0.389773	group_507	0.0444555	group_507	-0.458131	group_507	0.0162548	group_507	-0.10351	group_507	0.607402	group_507	0.0241121	group_507	0.904975
group_638	-0.369791	group_638	0.000679598	group_638	-0.506037	group_54	0.00382374	group_638	-0.581217	group_587	0.000135654	group_638	0.0241121	group_508	0.173358	group_508	-0.289418	group_508	0.143126	group_508	-0.389773	group_508	0.0444555	group_508	-0.458131	group_508	0.0162548	group_508	-0.10351	group_508	0.607402	group_508	0.0241121	group_508	0.904975
group_639	-0.369791	group_639	0.000679598	group_639	-0.506037	deoB_2	0.00449147	group_639	-0.581217	group_588	0.000135654	group_639	0.0241121	group_509	0.173358	group_509	-0.289418	group_509	0.143126	group_509	-0.389773	group_509	0.0444555	group_509	-0.458131	group_509	0.0162548	group_509	-0.10351	group_509	0.607402	group_509	0.0241121	group_509	0.904975
group_640	-0.369791	group_640	0.000679598	group_640	-0.506037	group_460	0.00449147	group_640	-0.581217	group_589	0.000135654	group_640	0.0241121	group_51	0.248904	group_51	0.154883	group_51	0.440477	group_51	0.0390054	group_51	0.846833	group_51	-0.0381246	group_51	0.850253	group_51	0.327327	group_51	0.0955874	group_51	0.266872	group_51	0.178416
group_641	-0.369791	group_641	0.000679598	group_641	-0.506037	group_166	0.00490122	group_641	-0.581217	group_590	0.000135654	group_641	0.0241121	group_510	0.173358	group_510	-0.289418	group_510	0.143126	group_510	-0.389773	group_510	0.0444555	group_510	-0.458131	group_510	0.0162548	group_510	-0.10351	group_510	0.607402	group_510	0.0241121	group_510	0.904975
group_642	-0.369791	group_642	0.000679598	group_642	-0.506037	group_2	0.00490122	group_642	-0.581217	group_591	0.000135654	group_642	0.0241121	group_511	0.173358	group_511	-0.289418	group_511	0.143126	group_511	-0.389773	group_511	0.0444555	group_511	-0.458131	group_511	0.0162548	group_511	-0.10351	group_511	0.607402	group_511	0.0241121	group_511	0.904975
group_645	-0.369791	group_645	0.000679598	group_645	-0.506037	group_299	0.00490122	group_645	-0.581217	group_592	0.000135654	group_645	0.0241121	group_512	0.173358	group_512	-0.289418	group_512	0.143126	group_512	-0.389773	group_512	0.0444555	group_512	-0.458131	group_512	0.0162548	group_512	-0.10351	group_512	0.607402	group_512	0.0241121	group_512	0.904975
soj	0.533244	soj	2.97116e-07	soj	0.26062	cynR	0.00696816	soj	0.73465	group_593	0.000135654	soj	-0.0325128	group_513	0.173358	group_513	-0.289418	group_513	0.143126	group_513	-0.389773	group_513	0.0444555	group_513	-0.458131	group_513	0.0162548	group_513	-0.10351	group_513	0.607402	group_513	0.0241121	group_513	0.904975
group_215	0.533244	group_215	2.97116e-07	group_215	0.26062	group_351	0.0107063	group_215	0.73465	group_594	0.000135654	group_215	-0.0325128	group_514	0.173358	group_514	-0.289418	group_514	0.143126	group_514	-0.389773	group_514	0.0444555	group_514	-0.458131	group_514	0.0162548	group_514	-0.10351	group_514	0.607402	group_514	0.0241121	group_514	0.904975
group_216	0.533244	group_216	2.97116e-07	group_216	0.26062	group_107	0.0114572	group_216	0.73465	group_595	0.000135654	group_216	-0.0325128	group_515	0.173358	group_515	-0.289418	group_515	0.143126	group_515	-0.389773	group_515	0.0444555	group_515	-0.458131	group_515	0.0162548	group_515	-0.10351	group_515	0.607402	group_515	0.0241121	group_515	0.904975
group_217	0.533244	group_217	2.97116e-07	group_217	0.26062	group_170	0.0114572	group_217	0.73465	group_633	0.000135654	group_217	-0.0325128	group_516	0.173358	group_516	-0.289418	group_516	0.143126	group_516	-0.389773	group_516	0.0444555	group_516	-0.458131	group_516	0.0162548	group_516	-0.10351	group_516	0.607402	group_516	0.0241121	group_516	0.904975
group_218	0.533244	group_218	2.97116e-07	group_218	0.26062	group_171	0.0114572	group_218	0.73465	group_634	0.000135654	group_218	-0.0325128	group_517	0.173358	group_517	-0.289418	group_517	0.143126	group_517	-0.389773	group_517	0.0444555	group_517	-0.458131	group_517	0.0162548	group_517	-0.10351	group_517	0.607402	group_517	0.0241121	group_517	0.904975
aadK_1	0.533244	aadK_1	2.97116e-07	aadK_1	0.26062	group_172	0.0114572	aadK_1	0.73465	group_635	0.000135654	aadK_1	-0.0325128	group_518	0.173358	group_518	-0.289418	group_518	0.143126	group_518	-0.389773	group_518	0.0444555	group_518	-0.458131	group_518	0.0162548	group_518	-0.10351	group_518	0.607402	group_518	0.0241121	group_518	0.904975
group_220	0.533244	group_220	2.97116e-07	group_220	0.26062	group_173	0.0114572	group_220	0.73465	group_636	0.000135654	group_220	-0.0325128	group_519	0.173358	group_519	-0.289418	group_519	0.143126	group_519	-0.389773	group_519	0.0444555	group_519	-0.458131	group_519	0.0162548	group_519	-0.10351	group_519	0.607402	group_519	0.0241121	group_519	0.904975
group_221	0.533244	group_221	2.97116e-07	group_221	0.26062	group_174	0.0114572	group_221	0.73465	group_643	0.000135654	group_221	-0.0325128	group_52	0.870877	group_52	-0.415369	group_52	0.0311918	group_52	-0.382253	group_52	0.0491009	group_52	-0.49562	group_52	0.00856708	group_52	-0.49099	group_52	0.00930757	group_52	-0.0762493	group_52	0.705426
group_222	0.533244	group_222	2.97116e-07	group_222	0.26062	group_175	0.0114572	group_222	0.73465	group_644	0.000135654	group_222	-0.0325128	group_520	0.173358	group_520	-0.289418	group_520	0.143126	group_520	-0.389773	group_520	0.0444555	group_520	-0.458131	group_520	0.0162548	group_520	-0.10351	group_520	0.607402	group_520	0.0241121	group_520	0.904975
group_223	0.533244	group_223	2.97116e-07	group_223	0.26062	group_176	0.0114572	group_223	0.73465	group_78	0.000135654	group_223	-0.0325128	group_521	0.173358	group_521	-0.289418	group_521	0.143126	group_521	-0.389773	group_521	0.0444555	group_521	-0.458131	group_521	0.0162548	group_521	-0.10351	group_521	0.607402	group_521	0.0241121	group_521	0.904975
group_224	0.533244	group_224	2.97116e-07	group_224	0.26062	group_177	0.0114572	group_224	0.73465	group_107	0.000143014	group_224	-0.0325128	group_523	0.173358	group_523	-0.289418	group_523	0.143126	group_523	-0.389773	group_523	0.0444555	group_523	-0.458131	group_523	0.0162548	group_523	-0.10351	group_523	0.607402	group_523	0.0241121	group_523	0.904975
group_271	0.533244	group_271	2.97116e-07	group_271	0.26062	group_178	0.0114572	group_271	0.73465	group_170	0.000143014	group_271	-0.0325128	group_524	0.173358	group_524	-0.289418	group_524	0.143126	group_524	-0.389773	group_524	0.0444555	group_524	-0.458131	group_524	0.0162548	group_524	-0.10351	group_524	0.607402	group_524	0.0241121	group_524	0.904975
bin3	0.533244	bin3	2.97116e-07	bin3	0.26062	group_179	0.0114572	bin3	0.73465	group_171	0.000143014	bin3	-0.0325128	group_525	0.173358	group_525	-0.289418	group_525	0.143126	group_525	-0.389773	group_525	0.0444555	group_525	-0.458131	group_525	0.0162548	group_525	-0.10351	group_525	0.607402	group_525	0.0241121	group_525	0.904975
group_273	0.533244	group_273	2.97116e-07	group_273	0.26062	group_180	0.0114572	group_273	0.73465	group_172	0.000143014	group_273	-0.0325128	group_526	0.173358	group_526	-0.289418	group_526	0.143126	group_526	-0.389773	group_526	0.0444555	group_526	-0.458131	group_526	0.0162548	group_526	-0.10351	group_526	0.607402	group_526	0.0241121	group_526	0.904975
tet.O.	0.533244	tet.O.	2.97116e-07	tet.O.	0.26062	group_181	0.0114572	tet.O.	0.73465	group_173	0.000143014	tet.O.	-0.0325128	group_527	0.173358	group_527	-0.289418	group_527	0.143126	group_527	-0.389773	group_527	0.0444555	group_527	-0.458131	group_527	0.0162548	group_527	-0.10351	group_527	0.607402	group_527	0.0241121	group_527	0.904975
group_275	0.533244	group_275	2.97116e-07	group_275	0.26062	group_184	0.0114572	group_275	0.73465	group_174	0.000143014	group_275	-0.0325128	group_528	0.173358	group_528	-0.289418	group_528	0.143126	group_528	-0.389773	group_528	0.0444555	group_528	-0.458131	group_528	0.0162548	group_528	-0.10351	group_528	0.607402	group_528	0.0241121	group_528	0.904975
group_276	0.533244	group_276	2.97116e-07	group_276	0.26062	group_187	0.0114572	group_276	0.73465	group_175	0.000143014	group_276	-0.0325128	group_529	0.173358	group_529	-0.289418	group_529	0.143126	group_529	-0.389773	group_529	0.0444555	group_529	-0.458131	group_529	0.0162548	group_529	-0.10351	group_529	0.607402	group_529	0.0241121	group_529	0.904975
group_277	0.533244	group_277	2.97116e-07	group_277	0.26062	group_194	0.0114572	group_277	0.73465	group_176	0.000143014	group_277	-0.0325128	group_53	0.744914	group_53	0.0281606	group_53	0.88911	group_53	-0.0312043	group_53	0.87721	group_53	-0.152499	group_53	0.447632	group_53	0.163663	group_53	0.414671	group_53	0.266872	group_53	0.178416
group_278	0.533244	group_278	2.97116e-07	group_278	0.26062	group_198	0.0114572	group_278	0.73465	group_177	0.000143014	group_278	-0.0325128	group_530	0.173358	group_530	-0.289418	group_530	0.143126	group_530	-0.389773	group_530	0.0444555	group_530	-0.458131	group_530	0.0162548	group_530	-0.10351	group_530	0.607402	group_530	0.0241121	group_530	0.904975
group_279	0.533244	group_279	2.97116e-07	group_279	0.26062	group_202	0.0114572	group_279	0.73465	group_178	0.000143014	group_279	-0.0325128	group_531	0.173358	group_531	-0.289418	group_531	0.143126	group_531	-0.389773	group_531	0.0444555	group_531	-0.458131	group_531	0.0162548	group_531	-0.10351	group_531	0.607402	group_531	0.0241121	group_531	0.904975
group_292	0.533244	group_292	2.97116e-07	group_292	0.26062	group_203	0.0114572	group_292	0.73465	group_179	0.000143014	group_292	-0.0325128	group_532	0.173358	group_532	-0.289418	group_532	0.143126	group_532	-0.389773	group_532	0.0444555	group_532	-0.458131	group_532	0.0162548	group_532	-0.10351	group_532	0.607402	group_532	0.0241121	group_532	0.904975
group_293	0.533244	group_293	2.97116e-07	group_293	0.26062	xerC_2	0.0114572	group_293	0.73465	group_180	0.000143014	group_293	-0.0325128	group_533	0.173358	group_533	-0.289418	group_533	0.143126	group_533	-0.389773	group_533	0.0444555	group_533	-0.458131	group_533	0.0162548	group_533	-0.10351	group_533	0.607402	group_533	0.0241121	group_533	0.904975
group_303	0.28406	group_303	0.0101704	group_303	0.235165	group_244	0.0114572	group_303	0.49051	group_181	0.000143014	group_303	0.0772179	group_534	0.173358	group_534	-0.289418	group_534	0.143126	group_534	-0.389773	group_534	0.0444555	group_534	-0.458131	group_534	0.0162548	group_534	-0.10351	group_534	0.607402	group_534	0.0241121	group_534	0.904975
group_307	0.533244	group_307	2.97116e-07	group_307	0.26062	group_2446	0.0114572	group_307	0.73465	group_184	0.000143014	group_307	-0.0325128	group_535	0.173358	group_535	-0.289418	group_535	0.143126	group_535	-0.389773	group_535	0.0444555	group_535	-0.458131	group_535	0.0162548	group_535	-0.10351	group_535	0.607402	group_535	0.0241121	group_535	0.904975
group_308	0.533244	group_308	2.97116e-07	group_308	0.26062	lexA	0.0114572	group_308	0.73465	group_187	0.000143014	group_308	-0.0325128	group_537	0.173358	group_537	-0.289418	group_537	0.143126	group_537	-0.389773	group_537	0.0444555	group_537	-0.458131	group_537	0.0162548	group_537	-0.10351	group_537	0.607402	group_537	0.0241121	group_537	0.904975
group_309	0.533244	group_309	2.97116e-07	group_309	0.26062	group_246	0.0114572	group_309	0.73465	group_194	0.000143014	group_309	-0.0325128	group_538	0.173358	group_538	-0.289418	group_538	0.143126	group_538	-0.389773	group_538	0.0444555	group_538	-0.458131	group_538	0.0162548	group_538	-0.10351	group_538	0.607402	group_538	0.0241121	group_538	0.904975
group_310	0.533244	group_310	2.97116e-07	group_310	0.26062	group_247	0.0114572	group_310	0.73465	group_198	0.000143014	group_310	-0.0325128	group_539	0.173358	group_539	-0.289418	group_539	0.143126	group_539	-0.389773	group_539	0.0444555	group_539	-0.458131	group_539	0.0162548	group_539	-0.10351	group_539	0.607402	group_539	0.0241121	group_539	0.904975
group_311	0.533244	group_311	2.97116e-07	group_311	0.26062	group_248	0.0114572	group_311	0.73465	group_202	0.000143014	group_311	-0.0325128	group_54	0.744914	group_54	-0.129539	group_54	0.519591	group_54	0.0312043	group_54	0.87721	group_54	-0.213498	group_54	0.284951	group_54	-0.523723	group_54	0.00505242	group_54	-0.609994	group_54	0.000729413
group_312	0.533244	group_312	2.97116e-07	group_312	0.26062	group_249	0.0114572	group_312	0.73465	group_203	0.000143014	group_312	-0.0325128	group_540	0.173358	group_540	-0.289418	group_540	0.143126	group_540	-0.389773	group_540	0.0444555	group_540	-0.458131	group_540	0.0162548	group_540	-0.10351	group_540	0.607402	group_540	0.0241121	group_540	0.904975
group_313	0.533244	group_313	2.97116e-07	group_313	0.26062	group_250	0.0114572	group_313	0.73465	xerC_2	0.000143014	group_313	-0.0325128	group_541	0.173358	group_541	-0.289418	group_541	0.143126	group_541	-0.389773	group_541	0.0444555	group_541	-0.458131	group_541	0.0162548	group_541	-0.10351	group_541	0.607402	group_541	0.0241121	group_541	0.904975
group_314	0.533244	group_314	2.97116e-07	group_314	0.26062	group_251	0.0114572	group_314	0.73465	group_244	0.000143014	group_314	-0.0325128	group_542	0.173358	group_542	-0.289418	group_542	0.143126	group_542	-0.389773	group_542	0.0444555	group_542	-0.458131	group_542	0.0162548	group_542	-0.10351	group_542	0.607402	group_542	0.0241121	group_542	0.904975
group_315	0.533244	group_315	2.97116e-07	group_315	0.26062	group_253	0.0114572	group_315	0.73465	group_2446	0.000143014	group_315	-0.0325128	group_543	0.173358	group_543	-0.289418	group_543	0.143126	group_543	-0.389773	group_543	0.0444555	group_543	-0.458131	group_543	0.0162548	group_543	-0.10351	group_543	0.607402	group_543	0.0241121	group_543	0.904975
group_316	0.533244	group_316	2.97116e-07	group_316	0.26062	group_254	0.0114572	group_316	0.73465	lexA	0.000143014	group_316	-0.0325128	group_544	0.173358	group_544	-0.289418	group_544	0.143126	group_544	-0.389773	group_544	0.0444555	group_544	-0.458131	group_544	0.0162548	group_544	-0.10351	group_544	0.607402	group_544	0.0241121	group_544	0.904975
group_317	0.533244	group_317	2.97116e-07	group_317	0.26062	group_255	0.0114572	group_317	0.73465	group_246	0.000143014	group_317	-0.0325128	group_545	0.173358	group_545	-0.289418	group_545	0.143126	group_545	-0.389773	group_545	0.0444555	group_545	-0.458131	group_545	0.0162548	group_545	-0.10351	group_545	0.607402	group_545	0.0241121	group_545	0.904975
group_318	0.533244	group_318	2.97116e-07	group_318	0.26062	group_256	0.0114572	group_318	0.73465	group_247	0.000143014	group_318	-0.0325128	group_546	0.173358	group_546	-0.289418	group_546	0.143126	group_546	-0.389773	group_546	0.0444555	group_546	-0.458131	group_546	0.0162548	group_546	-0.10351	group_546	0.607402	group_546	0.0241121	group_546	0.904975
group_319	0.533244	group_319	2.97116e-07	group_319	0.26062	group_257	0.0114572	group_319	0.73465	group_248	0.000143014	group_319	-0.0325128	group_547	0.173358	group_547	-0.289418	group_547	0.143126	group_547	-0.389773	group_547	0.0444555	group_547	-0.458131	group_547	0.0162548	group_547	-0.10351	group_547	0.607402	group_547	0.0241121	group_547	0.904975
group_320	0.533244	group_320	2.97116e-07	group_320	0.26062	group_258	0.0114572	group_320	0.73465	group_249	0.000143014	group_320	-0.0325128	group_548	0.173358	group_548	-0.289418	group_548	0.143126	group_548	-0.389773	group_548	0.0444555	group_548	-0.458131	group_548	0.0162548	group_548	-0.10351	group_548	0.607402	group_548	0.0241121	group_548	0.904975
group_321	0.533244	group_321	2.97116e-07	group_321	0.26062	group_259	0.0114572	group_321	0.73465	group_250	0.000143014	group_321	-0.0325128	group_549	0.173358	group_549	-0.289418	group_549	0.143126	group_549	-0.389773	group_549	0.0444555	group_549	-0.458131	group_549	0.0162548	group_549	-0.10351	group_549	0.607402	group_549	0.0241121	group_549	0.904975
group_322	0.533244	group_322	2.97116e-07	group_322	0.26062	radD	0.0114572	group_322	0.73465	group_251	0.000143014	group_322	-0.0325128	group_55	0.856887	group_55	-0.0898191	group_55	0.655935	group_55	0.138472	group_55	0.490945	group_55	-0.148034	group_55	0.461192	group_55	-0.363137	group_55	0.0626374	group_55	-0.422955	group_55	0.0279435
group_323	0.533244	group_323	2.97116e-07	group_323	0.26062	group_260	0.0114572	group_323	0.73465	group_253	0.000143014	group_323	-0.0325128	group_550	0.173358	group_550	-0.289418	group_550	0.143126	group_550	-0.389773	group_550	0.0444555	group_550	-0.458131	group_550	0.0162548	group_550	-0.10351	group_550	0.607402	group_550	0.0241121	group_550	0.904975
group_339	0.533244	group_339	2.97116e-07	group_339	0.26062	group_29	0.0114572	group_339	0.73465	group_254	0.000143014	group_339	-0.0325128	group_551	0.173358	group_551	-0.289418	group_551	0.143126	group_551	-0.389773	group_551	0.0444555	group_551	-0.458131	group_551	0.0162548	group_551	-0.10351	group_551	0.607402	group_551	0.0241121	group_551	0.904975
group_340	0.533244	group_340	2.97116e-07	group_340	0.26062	group_31	0.0114572	group_340	0.73465	group_255	0.000143014	group_340	-0.0325128	group_552	0.173358	group_552	-0.289418	group_552	0.143126	group_552	-0.389773	group_552	0.0444555	group_552	-0.458131	group_552	0.0162548	group_552	-0.10351	group_552	0.607402	group_552	0.0241121	group_552	0.904975
group_341	0.533244	group_341	2.97116e-07	group_341	0.26062	group_6	0.0114572	group_341	0.73465	group_256	0.000143014	group_341	-0.0325128	group_553	0.173358	group_553	-0.289418	group_553	0.143126	group_553	-0.389773	group_553	0.0444555	group_553	-0.458131	group_553	0.0162548	group_553	-0.10351	group_553	0.607402	group_553	0.0241121	group_553	0.904975
group_342	0.533244	group_342	2.97116e-07	group_342	0.26062	group_76	0.0114572	group_342	0.73465	group_257	0.000143014	group_342	-0.0325128	group_554	0.173358	group_554	-0.289418	group_554	0.143126	group_554	-0.389773	group_554	0.0444555	group_554	-0.458131	group_554	0.0162548	group_554	-0.10351	group_554	0.607402	group_554	0.0241121	group_554	0.904975
group_343	0.533244	group_343	2.97116e-07	group_343	0.26062	group_79	0.0114572	group_343	0.73465	group_258	0.000143014	group_343	-0.0325128	group_555	0.173358	group_555	-0.289418	group_555	0.143126	group_555	-0.389773	group_555	0.0444555	group_555	-0.458131	group_555	0.0162548	group_555	-0.10351	group_555	0.607402	group_555	0.0241121	group_555	0.904975
group_38	0.533244	group_38	2.97116e-07	group_38	0.26062	group_167	0.016192	group_38	0.73465	group_259	0.000143014	group_38	-0.0325128	group_556	0.173358	group_556	-0.289418	group_556	0.143126	group_556	-0.389773	group_556	0.0444555	group_556	-0.458131	group_556	0.0162548	group_556	-0.10351	group_556	0.607402	group_556	0.0241121	group_556	0.904975
group_637	-0.326454	group_637	0.0029359	group_637	-0.472012	xerD	0.016192	group_637	-0.560604	radD	0.000143014	group_637	-0.0325128	group_557	0.173358	group_557	-0.289418	group_557	0.143126	group_557	-0.389773	group_557	0.0444555	group_557	-0.458131	group_557	0.0162548	group_557	-0.10351	group_557	0.607402	group_557	0.0241121	group_557	0.904975
lacD_1	0.164992	lacD_1	0.141033	lacD_1	0.674918	group_263	0.0174642	lacD_1	0.13844	group_260	0.000143014	lacD_1	-0.0325128	group_558	0.173358	group_558	-0.289418	group_558	0.143126	group_558	-0.389773	group_558	0.0444555	group_558	-0.458131	group_558	0.0162548	group_558	-0.10351	group_558	0.607402	group_558	0.0241121	group_558	0.904975
group_71	0.533244	group_71	2.97116e-07	group_71	0.26062	group_57	0.0180198	group_71	0.73465	group_29	0.000143014	group_71	-0.0325128	group_559	0.173358	group_559	-0.289418	group_559	0.143126	group_559	-0.389773	group_559	0.0444555	group_559	-0.458131	group_559	0.0162548	group_559	-0.10351	group_559	0.607402	group_559	0.0241121	group_559	0.904975
adhA_2	0.533244	adhA_2	2.97116e-07	adhA_2	0.26062	group_73	0.0187789	adhA_2	0.73465	group_31	0.000143014	adhA_2	-0.0325128	group_56	0.248904	group_56	0.281606	group_56	0.154731	group_56	0.109215	group_56	0.587631	group_56	-0.152499	group_56	0.447632	group_56	0.327327	group_56	0.0955874	group_56	0.266872	group_56	0.178416
group_169	-0.129942	group_169	0.247595	group_169	-0.374203	soj	0.0187789	group_169	-0.41145	group_6	0.000143014	group_169	0.132326	group_560	0.173358	group_560	-0.289418	group_560	0.143126	group_560	-0.389773	group_560	0.0444555	group_560	-0.458131	group_560	0.0162548	group_560	-0.10351	group_560	0.607402	group_560	0.0241121	group_560	0.904975
group_182	0.327491	group_182	0.00284161	group_182	0.0428392	group_215	0.0187789	group_182	0.575075	group_76	0.000143014	group_182	-0.0909744	group_561	0.173358	group_561	-0.289418	group_561	0.143126	group_561	-0.389773	group_561	0.0444555	group_561	-0.458131	group_561	0.0162548	group_561	-0.10351	group_561	0.607402	group_561	0.0241121	group_561	0.904975
group_197	0.327491	group_197	0.00284161	group_197	0.0428392	group_216	0.0187789	group_197	0.575075	group_79	0.000143014	group_197	-0.0909744	group_562	0.173358	group_562	-0.289418	group_562	0.143126	group_562	-0.389773	group_562	0.0444555	group_562	-0.458131	group_562	0.0162548	group_562	-0.10351	group_562	0.607402	group_562	0.0241121	group_562	0.904975
group_346	-0.0907617	group_346	0.420344	group_346	0.21751	group_217	0.0187789	group_346	0.28339	hsdR	0.000156642	group_346	0.020676	group_563	0.173358	group_563	-0.289418	group_563	0.143126	group_563	-0.389773	group_563	0.0444555	group_563	-0.458131	group_563	0.0162548	group_563	-0.10351	group_563	0.607402	group_563	0.0241121	group_563	0.904975
group_348	-0.0907617	group_348	0.420344	group_348	0.21751	group_218	0.0187789	group_348	0.28339	group_362	0.000184369	group_348	0.020676	group_565	0.173358	group_565	-0.289418	group_565	0.143126	group_565	-0.389773	group_565	0.0444555	group_565	-0.458131	group_565	0.0162548	group_565	-0.10351	group_565	0.607402	group_565	0.0241121	group_565	0.904975
group_571	-0.129942	group_571	0.247595	group_571	-0.374203	aadK_1	0.0187789	group_571	-0.41145	group_363	0.000184369	group_571	0.132326	group_567	0.173358	group_567	-0.289418	group_567	0.143126	group_567	-0.389773	group_567	0.0444555	group_567	-0.458131	group_567	0.0162548	group_567	-0.10351	group_567	0.607402	group_567	0.0241121	group_567	0.904975
group_572	-0.129942	group_572	0.247595	group_572	-0.374203	group_220	0.0187789	group_572	-0.41145	group_364	0.000184369	group_572	0.132326	group_568	0.173358	group_568	-0.289418	group_568	0.143126	group_568	-0.389773	group_568	0.0444555	group_568	-0.458131	group_568	0.0162548	group_568	-0.10351	group_568	0.607402	group_568	0.0241121	group_568	0.904975
group_573	-0.129942	group_573	0.247595	group_573	-0.374203	group_221	0.0187789	group_573	-0.41145	group_365	0.000184369	group_573	0.132326	group_57	0.358692	group_57	-0.205573	group_57	0.30363	group_57	-0.305802	group_57	0.120845	group_57	-0.350747	group_57	0.0728495	group_57	-0.130931	group_57	0.515076	group_57	-0.198248	group_57	0.321555
group_574	-0.129942	group_574	0.247595	group_574	-0.374203	group_222	0.0187789	group_574	-0.41145	ndhC	0.000184369	group_574	0.132326	group_570	0.173358	group_570	-0.289418	group_570	0.143126	group_570	-0.389773	group_570	0.0444555	group_570	-0.458131	group_570	0.0162548	group_570	-0.10351	group_570	0.607402	group_570	0.0241121	group_570	0.904975
group_575	-0.129942	group_575	0.247595	group_575	-0.374203	group_223	0.0187789	group_575	-0.41145	ndhK1	0.000184369	group_575	0.132326	group_571	0.223699	group_571	-0.145086	group_571	0.470263	group_571	-0.28092	group_571	0.155781	group_571	-0.504494	group_571	0.00728544	group_571	-0.0355036	group_571	0.860445	group_571	0.132326	group_571	0.510567
group_576	-0.129942	group_576	0.247595	group_576	-0.374203	group_224	0.0187789	group_576	-0.41145	group_66	0.000184369	group_576	0.132326	group_572	0.223699	group_572	-0.145086	group_572	0.470263	group_572	-0.28092	group_572	0.155781	group_572	-0.504494	group_572	0.00728544	group_572	-0.0355036	group_572	0.860445	group_572	0.132326	group_572	0.510567
group_577	-0.129942	group_577	0.247595	group_577	-0.374203	group_271	0.0187789	group_577	-0.41145	group_30	0.000315159	group_577	0.132326	group_573	0.223699	group_573	-0.145086	group_573	0.470263	group_573	-0.28092	group_573	0.155781	group_573	-0.504494	group_573	0.00728544	group_573	-0.0355036	group_573	0.860445	group_573	0.132326	group_573	0.510567
group_578	-0.129942	group_578	0.247595	group_578	-0.374203	bin3	0.0187789	group_578	-0.41145	group_336	0.000315159	group_578	0.132326	group_574	0.223699	group_574	-0.145086	group_574	0.470263	group_574	-0.28092	group_574	0.155781	group_574	-0.504494	group_574	0.00728544	group_574	-0.0355036	group_574	0.860445	group_574	0.132326	group_574	0.510567
group_579	-0.129942	group_579	0.247595	group_579	-0.374203	group_273	0.0187789	group_579	-0.41145	group_337	0.000315159	group_579	0.132326	group_575	0.223699	group_575	-0.145086	group_575	0.470263	group_575	-0.28092	group_575	0.155781	group_575	-0.504494	group_575	0.00728544	group_575	-0.0355036	group_575	0.860445	group_575	0.132326	group_575	0.510567
group_580	-0.129942	group_580	0.247595	group_580	-0.374203	tet.O.	0.0187789	group_580	-0.41145	group_338	0.000315159	group_580	0.132326	group_576	0.223699	group_576	-0.145086	group_576	0.470263	group_576	-0.28092	group_576	0.155781	group_576	-0.504494	group_576	0.00728544	group_576	-0.0355036	group_576	0.860445	group_576	0.132326	group_576	0.510567
group_581	-0.129942	group_581	0.247595	group_581	-0.374203	group_275	0.0187789	group_581	-0.41145	xerC_4	0.000315159	group_581	0.132326	group_577	0.223699	group_577	-0.145086	group_577	0.470263	group_577	-0.28092	group_577	0.155781	group_577	-0.504494	group_577	0.00728544	group_577	-0.0355036	group_577	0.860445	group_577	0.132326	group_577	0.510567
group_582	-0.129942	group_582	0.247595	group_582	-0.374203	group_276	0.0187789	group_582	-0.41145	group_80	0.000315159	group_582	0.132326	group_578	0.223699	group_578	-0.145086	group_578	0.470263	group_578	-0.28092	group_578	0.155781	group_578	-0.504494	group_578	0.00728544	group_578	-0.0355036	group_578	0.860445	group_578	0.132326	group_578	0.510567
group_583	-0.129942	group_583	0.247595	group_583	-0.374203	group_277	0.0187789	group_583	-0.41145	group_89	0.000315159	group_583	0.132326	group_579	0.223699	group_579	-0.145086	group_579	0.470263	group_579	-0.28092	group_579	0.155781	group_579	-0.504494	group_579	0.00728544	group_579	-0.0355036	group_579	0.860445	group_579	0.132326	group_579	0.510567
group_584	-0.129942	group_584	0.247595	group_584	-0.374203	group_278	0.0187789	group_584	-0.41145	group_263	0.000418409	group_584	0.132326	group_580	0.223699	group_580	-0.145086	group_580	0.470263	group_580	-0.28092	group_580	0.155781	group_580	-0.504494	group_580	0.00728544	group_580	-0.0355036	group_580	0.860445	group_580	0.132326	group_580	0.510567
group_585	-0.129942	group_585	0.247595	group_585	-0.374203	group_279	0.0187789	group_585	-0.41145	group_206	0.0010624	group_585	0.132326	group_581	0.223699	group_581	-0.145086	group_581	0.470263	group_581	-0.28092	group_581	0.155781	group_581	-0.504494	group_581	0.00728544	group_581	-0.0355036	group_581	0.860445	group_581	0.132326	group_581	0.510567
group_586	-0.129942	group_586	0.247595	group_586	-0.374203	group_292	0.0187789	group_586	-0.41145	group_7	0.00170932	group_586	0.132326	group_582	0.223699	group_582	-0.145086	group_582	0.470263	group_582	-0.28092	group_582	0.155781	group_582	-0.504494	group_582	0.00728544	group_582	-0.0355036	group_582	0.860445	group_582	0.132326	group_582	0.510567
group_587	-0.129942	group_587	0.247595	group_587	-0.374203	group_293	0.0187789	group_587	-0.41145	group_205	0.00259212	group_587	0.132326	group_583	0.223699	group_583	-0.145086	group_583	0.470263	group_583	-0.28092	group_583	0.155781	group_583	-0.504494	group_583	0.00728544	group_583	-0.0355036	group_583	0.860445	group_583	0.132326	group_583	0.510567
group_588	-0.129942	group_588	0.247595	group_588	-0.374203	group_307	0.0187789	group_588	-0.41145	group_24	0.00263504	group_588	0.132326	group_584	0.223699	group_584	-0.145086	group_584	0.470263	group_584	-0.28092	group_584	0.155781	group_584	-0.504494	group_584	0.00728544	group_584	-0.0355036	group_584	0.860445	group_584	0.132326	group_584	0.510567
group_589	-0.129942	group_589	0.247595	group_589	-0.374203	group_308	0.0187789	group_589	-0.41145	group_2448	0.00263504	group_589	0.132326	group_585	0.223699	group_585	-0.145086	group_585	0.470263	group_585	-0.28092	group_585	0.155781	group_585	-0.504494	group_585	0.00728544	group_585	-0.0355036	group_585	0.860445	group_585	0.132326	group_585	0.510567
group_590	-0.129942	group_590	0.247595	group_590	-0.374203	group_309	0.0187789	group_590	-0.41145	group_105	0.00356297	group_590	0.132326	group_586	0.223699	group_586	-0.145086	group_586	0.470263	group_586	-0.28092	group_586	0.155781	group_586	-0.504494	group_586	0.00728544	group_586	-0.0355036	group_586	0.860445	group_586	0.132326	group_586	0.510567
group_591	-0.129942	group_591	0.247595	group_591	-0.374203	group_310	0.0187789	group_591	-0.41145	group_183	0.00356297	group_591	0.132326	group_587	0.223699	group_587	-0.145086	group_587	0.470263	group_587	-0.28092	group_587	0.155781	group_587	-0.504494	group_587	0.00728544	group_587	-0.0355036	group_587	0.860445	group_587	0.132326	group_587	0.510567
group_592	-0.129942	group_592	0.247595	group_592	-0.374203	group_311	0.0187789	group_592	-0.41145	group_165	0.00401848	group_592	0.132326	group_588	0.223699	group_588	-0.145086	group_588	0.470263	group_588	-0.28092	group_588	0.155781	group_588	-0.504494	group_588	0.00728544	group_588	-0.0355036	group_588	0.860445	group_588	0.132326	group_588	0.510567
group_593	-0.129942	group_593	0.247595	group_593	-0.374203	group_312	0.0187789	group_593	-0.41145	group_207	0.00401848	group_593	0.132326	group_589	0.223699	group_589	-0.145086	group_589	0.470263	group_589	-0.28092	group_589	0.155781	group_589	-0.504494	group_589	0.00728544	group_589	-0.0355036	group_589	0.860445	group_589	0.132326	group_589	0.510567
group_594	-0.129942	group_594	0.247595	group_594	-0.374203	group_313	0.0187789	group_594	-0.41145	deoB_2	0.00502251	group_594	0.132326	group_59	0.856887	group_59	-0.300699	group_59	0.127493	group_59	-0.212036	group_59	0.288341	group_59	-0.338364	group_59	0.0842872	group_59	-0.363137	group_59	0.0626374	group_59	0.148034	group_59	0.461192
group_595	-0.129942	group_595	0.247595	group_595	-0.374203	group_314	0.0187789	group_595	-0.41145	group_460	0.00502251	group_595	0.132326	group_590	0.223699	group_590	-0.145086	group_590	0.470263	group_590	-0.28092	group_590	0.155781	group_590	-0.504494	group_590	0.00728544	group_590	-0.0355036	group_590	0.860445	group_590	0.132326	group_590	0.510567
group_633	-0.129942	group_633	0.247595	group_633	-0.374203	group_315	0.0187789	group_633	-0.41145	deoB_1	0.00683455	group_633	0.132326	group_591	0.223699	group_591	-0.145086	group_591	0.470263	group_591	-0.28092	group_591	0.155781	group_591	-0.504494	group_591	0.00728544	group_591	-0.0355036	group_591	0.860445	group_591	0.132326	group_591	0.510567
group_634	-0.129942	group_634	0.247595	group_634	-0.374203	group_316	0.0187789	group_634	-0.41145	group_459	0.00683455	group_634	0.132326	group_592	0.223699	group_592	-0.145086	group_592	0.470263	group_592	-0.28092	group_592	0.155781	group_592	-0.504494	group_592	0.00728544	group_592	-0.0355036	group_592	0.860445	group_592	0.132326	group_592	0.510567
group_635	-0.129942	group_635	0.247595	group_635	-0.374203	group_317	0.0187789	group_635	-0.41145	group_102	0.00878036	group_635	0.132326	group_593	0.223699	group_593	-0.145086	group_593	0.470263	group_593	-0.28092	group_593	0.155781	group_593	-0.504494	group_593	0.00728544	group_593	-0.0355036	group_593	0.860445	group_593	0.132326	group_593	0.510567
group_636	-0.129942	group_636	0.247595	group_636	-0.374203	group_318	0.0187789	group_636	-0.41145	group_358	0.00878036	group_636	0.132326	group_594	0.223699	group_594	-0.145086	group_594	0.470263	group_594	-0.28092	group_594	0.155781	group_594	-0.504494	group_594	0.00728544	group_594	-0.0355036	group_594	0.860445	group_594	0.132326	group_594	0.510567
group_643	-0.129942	group_643	0.247595	group_643	-0.374203	group_319	0.0187789	group_643	-0.41145	group_359	0.00878036	group_643	0.132326	group_595	0.223699	group_595	-0.145086	group_595	0.470263	group_595	-0.28092	group_595	0.155781	group_595	-0.504494	group_595	0.00728544	group_595	-0.0355036	group_595	0.860445	group_595	0.132326	group_595	0.510567
group_644	-0.129942	group_644	0.247595	group_644	-0.374203	group_320	0.0187789	group_644	-0.41145	group_360	0.00878036	group_644	0.132326	group_596	0.173358	group_596	-0.289418	group_596	0.143126	group_596	-0.389773	group_596	0.0444555	group_596	-0.458131	group_596	0.0162548	group_596	-0.10351	group_596	0.607402	group_596	0.0241121	group_596	0.904975
group_78	-0.129942	group_78	0.247595	group_78	-0.374203	group_321	0.0187789	group_78	-0.41145	group_346	0.0103577	group_78	0.132326	group_597	0.173358	group_597	-0.289418	group_597	0.143126	group_597	-0.389773	group_597	0.0444555	group_597	-0.458131	group_597	0.0162548	group_597	-0.10351	group_597	0.607402	group_597	0.0241121	group_597	0.904975
group_199	0.35102	group_199	0.00131371	group_199	0.0346536	group_322	0.0187789	group_199	0.587829	group_348	0.0103577	group_199	-0.0381246	group_598	0.173358	group_598	-0.289418	group_598	0.143126	group_598	-0.389773	group_598	0.0444555	group_598	-0.458131	group_598	0.0162548	group_598	-0.10351	group_598	0.607402	group_598	0.0241121	group_598	0.904975
group_200	0.35102	group_200	0.00131371	group_200	0.0346536	group_323	0.0187789	group_200	0.587829	group_54	0.0205346	group_200	-0.0381246	group_599	0.173358	group_599	-0.289418	group_599	0.143126	group_599	-0.389773	group_599	0.0444555	group_599	-0.458131	group_599	0.0162548	group_599	-0.10351	group_599	0.607402	group_599	0.0241121	group_599	0.904975
group_201	0.35102	group_201	0.00131371	group_201	0.0346536	group_339	0.0187789	group_201	0.587829	group_261	0.0227651	group_201	-0.0381246	group_6	0.0613835	group_6	0.116605	group_6	0.562447	group_6	0.28295	group_6	0.152688	group_6	0.351696	group_6	0.0720243	group_6	0.0686264	group_6	0.733766	group_6	-0.0279758	group_6	0.889833
group_77	0.35102	group_77	0.00131371	group_77	0.0346536	group_340	0.0187789	group_77	0.587829	group_52	0.0265184	group_77	-0.0381246	group_600	0.173358	group_600	-0.289418	group_600	0.143126	group_600	-0.389773	group_600	0.0444555	group_600	-0.458131	group_600	0.0162548	group_600	-0.10351	group_600	0.607402	group_600	0.0241121	group_600	0.904975
group_299	0.26214	group_299	0.0180744	group_299	0.309695	group_341	0.0187789	group_299	0.499683	group_4	0.0295455	group_299	0.0174928	group_601	0.173358	group_601	-0.289418	group_601	0.143126	group_601	-0.389773	group_601	0.0444555	group_601	-0.458131	group_601	0.0162548	group_601	-0.10351	group_601	0.607402	group_601	0.0241121	group_601	0.904975
group_7	0.170056	group_7	0.129065	group_7	0.51789	group_342	0.0187789	group_7	0.343193	group_55	0.0295455	group_7	0.0174928	group_602	0.173358	group_602	-0.289418	group_602	0.143126	group_602	-0.389773	group_602	0.0444555	group_602	-0.458131	group_602	0.0162548	group_602	-0.10351	group_602	0.607402	group_602	0.0241121	group_602	0.904975
group_207	0.272826	group_207	0.0137315	group_207	0.0255445	group_343	0.0187789	group_207	0.316301	group_57	0.0322128	group_207	0.0144098	group_603	0.173358	group_603	-0.289418	group_603	0.143126	group_603	-0.389773	group_603	0.0444555	group_603	-0.458131	group_603	0.0162548	group_603	-0.10351	group_603	0.607402	group_603	0.0241121	group_603	0.904975
group_347	0.547773	group_347	1.20627e-07	group_347	0.447951	group_38	0.0187789	group_347	0.527772	group_28	0.0331858	group_347	0.0144098	group_604	0.173358	group_604	-0.289418	group_604	0.143126	group_604	-0.389773	group_604	0.0444555	group_604	-0.458131	group_604	0.0162548	group_604	-0.10351	group_604	0.607402	group_604	0.0241121	group_604	0.904975
group_349	0.547773	group_349	1.20627e-07	group_349	0.447951	group_71	0.0187789	group_349	0.527772	group_3	0.0345126	group_349	0.0144098	group_605	0.173358	group_605	-0.289418	group_605	0.143126	group_605	-0.389773	group_605	0.0444555	group_605	-0.458131	group_605	0.0162548	group_605	-0.10351	group_605	0.607402	group_605	0.0241121	group_605	0.904975
group_352	-0.120037	group_352	0.285787	group_352	0.335274	adhA_2	0.0187789	group_352	0.172168	group_50	0.0345126	group_352	0.0144098	group_606	0.173358	group_606	-0.289418	group_606	0.143126	group_606	-0.389773	group_606	0.0444555	group_606	-0.458131	group_606	0.0162548	group_606	-0.10351	group_606	0.607402	group_606	0.0241121	group_606	0.904975
group_459	-0.36945	group_459	0.000688033	group_459	-0.372511	group_19	0.0191678	group_459	-0.298295	group_252	0.03755	group_459	-0.115278	group_607	0.173358	group_607	-0.289418	group_607	0.143126	group_607	-0.389773	group_607	0.0444555	group_607	-0.458131	group_607	0.0162548	group_607	-0.10351	group_607	0.607402	group_607	0.0241121	group_607	0.904975
group_460	-0.19386	group_460	0.0828984	group_460	-0.312617	group_5	0.0237527	group_460	-0.308871	group_402	0.03755	group_460	-0.115278	group_608	0.173358	group_608	-0.289418	group_608	0.143126	group_608	-0.389773	group_608	0.0444555	group_608	-0.458131	group_608	0.0162548	group_608	-0.10351	group_608	0.607402	group_608	0.0241121	group_608	0.904975
group_21	0.108526	group_21	0.334845	group_21	-0.131469	group_303	0.0345727	group_21	-0.171978	group_403	0.03755	group_21	0.314786	group_609	0.173358	group_609	-0.289418	group_609	0.143126	group_609	-0.389773	group_609	0.0444555	group_609	-0.458131	group_609	0.0162548	group_609	-0.10351	group_609	0.607402	group_609	0.0241121	group_609	0.904975
group_211	0.289043	group_211	0.00886876	group_211	-0.225675	group_67	0.0377675	group_211	0.621501	lexA_1	0.03755	group_211	0.0112423	group_610	0.173358	group_610	-0.289418	group_610	0.143126	group_610	-0.389773	group_610	0.0444555	group_610	-0.458131	group_610	0.0162548	group_610	-0.10351	group_610	0.607402	group_610	0.0241121	group_610	0.904975
erm	0.289043	erm	0.00886876	erm	-0.225675	group_211	0.0427931	erm	0.621501	group_405	0.03755	erm	0.0112423	group_611	0.173358	group_611	-0.289418	group_611	0.143126	group_611	-0.389773	group_611	0.0444555	group_611	-0.458131	group_611	0.0162548	group_611	-0.10351	group_611	0.607402	group_611	0.0241121	group_611	0.904975
group_213	0.289043	group_213	0.00886876	group_213	-0.225675	erm	0.0427931	group_213	0.621501	group_409	0.03755	group_213	0.0112423	group_612	0.173358	group_612	-0.289418	group_612	0.143126	group_612	-0.389773	group_612	0.0444555	group_612	-0.458131	group_612	0.0162548	group_612	-0.10351	group_612	0.607402	group_612	0.0241121	group_612	0.904975
group_25	-0.220296	group_25	0.0481319	group_25	0.347351	group_213	0.0427931	group_25	-0.203133	group_410	0.03755	group_25	0.0112423	group_613	0.173358	group_613	-0.289418	group_613	0.143126	group_613	-0.389773	group_613	0.0444555	group_613	-0.458131	group_613	0.0162548	group_613	-0.10351	group_613	0.607402	group_613	0.0241121	group_613	0.904975
group_270	0.289043	group_270	0.00886876	group_270	-0.225675	group_270	0.0427931	group_270	0.621501	group_27	0.0455425	group_270	0.0112423	group_614	0.173358	group_614	-0.289418	group_614	0.143126	group_614	-0.389773	group_614	0.0444555	group_614	-0.458131	group_614	0.0162548	group_614	-0.10351	group_614	0.607402	group_614	0.0241121	group_614	0.904975
group_368	-0.220296	group_368	0.0481319	group_368	0.347351	group_353	0.0484966	group_368	-0.203133	fruA_4	0.0669049	group_368	0.0112423	group_615	0.173358	group_615	-0.289418	group_615	0.143126	group_615	-0.389773	group_615	0.0444555	group_615	-0.458131	group_615	0.0162548	group_615	-0.10351	group_615	0.607402	group_615	0.0241121	group_615	0.904975
group_369	-0.220296	group_369	0.0481319	group_369	0.347351	group_56	0.0500168	group_369	-0.203133	group_649	0.0669049	group_369	0.0112423	group_616	0.173358	group_616	-0.289418	group_616	0.143126	group_616	-0.389773	group_616	0.0444555	group_616	-0.458131	group_616	0.0162548	group_616	-0.10351	group_616	0.607402	group_616	0.0241121	group_616	0.904975
nisB_2	-0.220296	nisB_2	0.0481319	nisB_2	0.347351	group_346	0.0511068	nisB_2	-0.203133	group_141	0.0689424	nisB_2	0.0112423	group_617	0.173358	group_617	-0.289418	group_617	0.143126	group_617	-0.389773	group_617	0.0444555	group_617	-0.458131	group_617	0.0162548	group_617	-0.10351	group_617	0.607402	group_617	0.0241121	group_617	0.904975
nsuA	-0.220296	nsuA	0.0481319	nsuA	0.347351	group_348	0.0511068	nsuA	-0.203133	group_142	0.0689424	nsuA	0.0112423	group_618	0.173358	group_618	-0.289418	group_618	0.143126	group_618	-0.389773	group_618	0.0444555	group_618	-0.458131	group_618	0.0162548	group_618	-0.10351	group_618	0.607402	group_618	0.0241121	group_618	0.904975
group_372	-0.220296	group_372	0.0481319	group_372	0.347351	group_18	0.0569735	group_372	-0.203133	group_324	0.0689424	group_372	0.0112423	group_620	0.173358	group_620	-0.289418	group_620	0.143126	group_620	-0.389773	group_620	0.0444555	group_620	-0.458131	group_620	0.0162548	group_620	-0.10351	group_620	0.607402	group_620	0.0241121	group_620	0.904975
Int.Tn	-0.220296	Int.Tn	0.0481319	Int.Tn	0.347351	group_206	0.0588555	Int.Tn	-0.203133	group_325	0.0689424	Int.Tn	0.0112423	group_621	0.173358	group_621	-0.289418	group_621	0.143126	group_621	-0.389773	group_621	0.0444555	group_621	-0.458131	group_621	0.0162548	group_621	-0.10351	group_621	0.607402	group_621	0.0241121	group_621	0.904975
group_374	-0.220296	group_374	0.0481319	group_374	0.347351	graR_1	0.0752875	group_374	-0.203133	group_9	0.0689424	group_374	0.0112423	group_622	0.173358	group_622	-0.289418	group_622	0.143126	group_622	-0.389773	group_622	0.0444555	group_622	-0.458131	group_622	0.0162548	group_622	-0.10351	group_622	0.607402	group_622	0.0241121	group_622	0.904975
group_375	-0.220296	group_375	0.0481319	group_375	0.347351	group_3	0.0834321	group_375	-0.203133	group_25	0.0689424	group_375	0.0112423	group_623	0.173358	group_623	-0.289418	group_623	0.143126	group_623	-0.389773	group_623	0.0444555	group_623	-0.458131	group_623	0.0162548	group_623	-0.10351	group_623	0.607402	group_623	0.0241121	group_623	0.904975
group_376	-0.220296	group_376	0.0481319	group_376	0.347351	group_50	0.0834321	group_376	-0.203133	group_368	0.0689424	group_376	0.0112423	group_624	0.173358	group_624	-0.289418	group_624	0.143126	group_624	-0.389773	group_624	0.0444555	group_624	-0.458131	group_624	0.0162548	group_624	-0.10351	group_624	0.607402	group_624	0.0241121	group_624	0.904975
group_377	-0.220296	group_377	0.0481319	group_377	0.347351	ispE_2	0.0874262	group_377	-0.203133	group_369	0.0689424	group_377	0.0112423	group_625	0.173358	group_625	-0.289418	group_625	0.143126	group_625	-0.389773	group_625	0.0444555	group_625	-0.458131	group_625	0.0162548	group_625	-0.10351	group_625	0.607402	group_625	0.0241121	group_625	0.904975
tet.M.	-0.220296	tet.M.	0.0481319	tet.M.	0.347351	group_4	0.105691	tet.M.	-0.203133	nisB_2	0.0689424	tet.M.	0.0112423	group_626	0.173358	group_626	-0.289418	group_626	0.143126	group_626	-0.389773	group_626	0.0444555	group_626	-0.458131	group_626	0.0162548	group_626	-0.10351	group_626	0.607402	group_626	0.0241121	group_626	0.904975
group_379	-0.220296	group_379	0.0481319	group_379	0.347351	group_55	0.105691	group_379	-0.203133	nsuA	0.0689424	group_379	0.0112423	group_627	0.173358	group_627	-0.289418	group_627	0.143126	group_627	-0.389773	group_627	0.0444555	group_627	-0.458131	group_627	0.0162548	group_627	-0.10351	group_627	0.607402	group_627	0.0241121	group_627	0.904975
group_380	-0.220296	group_380	0.0481319	group_380	0.347351	group_261	0.123423	group_380	-0.203133	group_372	0.0689424	group_380	0.0112423	group_628	0.173358	group_628	-0.289418	group_628	0.143126	group_628	-0.389773	group_628	0.0444555	group_628	-0.458131	group_628	0.0162548	group_628	-0.10351	group_628	0.607402	group_628	0.0241121	group_628	0.904975
group_381	-0.220296	group_381	0.0481319	group_381	0.347351	group_350	0.125064	group_381	-0.203133	Int.Tn	0.0689424	group_381	0.0112423	group_629	0.173358	group_629	-0.289418	group_629	0.143126	group_629	-0.389773	group_629	0.0444555	group_629	-0.458131	group_629	0.0162548	group_629	-0.10351	group_629	0.607402	group_629	0.0241121	group_629	0.904975
group_382	-0.220296	group_382	0.0481319	group_382	0.347351	group_10	0.160127	group_382	-0.203133	group_374	0.0689424	group_382	0.0112423	group_630	0.173358	group_630	-0.289418	group_630	0.143126	group_630	-0.389773	group_630	0.0444555	group_630	-0.458131	group_630	0.0162548	group_630	-0.10351	group_630	0.607402	group_630	0.0241121	group_630	0.904975
group_383	-0.220296	group_383	0.0481319	group_383	0.347351	group_52	0.166104	group_383	-0.203133	group_375	0.0689424	group_383	0.0112423	group_631	0.173358	group_631	-0.289418	group_631	0.143126	group_631	-0.389773	group_631	0.0444555	group_631	-0.458131	group_631	0.0162548	group_631	-0.10351	group_631	0.607402	group_631	0.0241121	group_631	0.904975
group_384	-0.220296	group_384	0.0481319	group_384	0.347351	group_91	0.236057	group_384	-0.203133	group_376	0.0689424	group_384	0.0112423	group_632	0.173358	group_632	-0.289418	group_632	0.143126	group_632	-0.389773	group_632	0.0444555	group_632	-0.458131	group_632	0.0162548	group_632	-0.10351	group_632	0.607402	group_632	0.0241121	group_632	0.904975
group_385	-0.220296	group_385	0.0481319	group_385	0.347351	group_21	0.242033	group_385	-0.203133	group_377	0.0689424	group_385	0.0112423	group_633	0.223699	group_633	-0.145086	group_633	0.470263	group_633	-0.28092	group_633	0.155781	group_633	-0.504494	group_633	0.00728544	group_633	-0.0355036	group_633	0.860445	group_633	0.132326	group_633	0.510567
group_386	-0.220296	group_386	0.0481319	group_386	0.347351	group_30	0.259931	group_386	-0.203133	tet.M.	0.0689424	group_386	0.0112423	group_634	0.223699	group_634	-0.145086	group_634	0.470263	group_634	-0.28092	group_634	0.155781	group_634	-0.504494	group_634	0.00728544	group_634	-0.0355036	group_634	0.860445	group_634	0.132326	group_634	0.510567
group_387	-0.220296	group_387	0.0481319	group_387	0.347351	group_336	0.259931	group_387	-0.203133	group_379	0.0689424	group_387	0.0112423	group_635	0.223699	group_635	-0.145086	group_635	0.470263	group_635	-0.28092	group_635	0.155781	group_635	-0.504494	group_635	0.00728544	group_635	-0.0355036	group_635	0.860445	group_635	0.132326	group_635	0.510567
group_388	-0.220296	group_388	0.0481319	group_388	0.347351	group_337	0.259931	group_388	-0.203133	group_380	0.0689424	group_388	0.0112423	group_636	0.223699	group_636	-0.145086	group_636	0.470263	group_636	-0.28092	group_636	0.155781	group_636	-0.504494	group_636	0.00728544	group_636	-0.0355036	group_636	0.860445	group_636	0.132326	group_636	0.510567
group_389	-0.220296	group_389	0.0481319	group_389	0.347351	group_338	0.259931	group_389	-0.203133	group_381	0.0689424	group_389	0.0112423	group_637	0.14673	group_637	-0.258166	group_637	0.193544	group_637	-0.357587	group_637	0.0670644	group_637	-0.333256	group_637	0.0893833	group_637	-0.0697863	group_637	0.72943	group_637	-0.0325128	group_637	0.872102
group_390	-0.220296	group_390	0.0481319	group_390	0.347351	xerC_4	0.259931	group_390	-0.203133	group_382	0.0689424	group_390	0.0112423	group_638	0.173358	group_638	-0.289418	group_638	0.143126	group_638	-0.389773	group_638	0.0444555	group_638	-0.458131	group_638	0.0162548	group_638	-0.10351	group_638	0.607402	group_638	0.0241121	group_638	0.904975
group_391	-0.220296	group_391	0.0481319	group_391	0.347351	group_80	0.259931	group_391	-0.203133	group_383	0.0689424	group_391	0.0112423	group_639	0.173358	group_639	-0.289418	group_639	0.143126	group_639	-0.389773	group_639	0.0444555	group_639	-0.458131	group_639	0.0162548	group_639	-0.10351	group_639	0.607402	group_639	0.0241121	group_639	0.904975
group_392	-0.220296	group_392	0.0481319	group_392	0.347351	group_89	0.259931	group_392	-0.203133	group_384	0.0689424	group_392	0.0112423	group_640	0.173358	group_640	-0.289418	group_640	0.143126	group_640	-0.389773	group_640	0.0444555	group_640	-0.458131	group_640	0.0162548	group_640	-0.10351	group_640	0.607402	group_640	0.0241121	group_640	0.904975
group_393	-0.220296	group_393	0.0481319	group_393	0.347351	group_362	0.261768	group_393	-0.203133	group_385	0.0689424	group_393	0.0112423	group_641	0.173358	group_641	-0.289418	group_641	0.143126	group_641	-0.389773	group_641	0.0444555	group_641	-0.458131	group_641	0.0162548	group_641	-0.10351	group_641	0.607402	group_641	0.0241121	group_641	0.904975
group_394	-0.220296	group_394	0.0481319	group_394	0.347351	group_363	0.261768	group_394	-0.203133	group_386	0.0689424	group_394	0.0112423	group_642	0.173358	group_642	-0.289418	group_642	0.143126	group_642	-0.389773	group_642	0.0444555	group_642	-0.458131	group_642	0.0162548	group_642	-0.10351	group_642	0.607402	group_642	0.0241121	group_642	0.904975
group_395	-0.220296	group_395	0.0481319	group_395	0.347351	group_364	0.261768	group_395	-0.203133	group_387	0.0689424	group_395	0.0112423	group_643	0.223699	group_643	-0.145086	group_643	0.470263	group_643	-0.28092	group_643	0.155781	group_643	-0.504494	group_643	0.00728544	group_643	-0.0355036	group_643	0.860445	group_643	0.132326	group_643	0.510567
group_396	-0.220296	group_396	0.0481319	group_396	0.347351	group_365	0.261768	group_396	-0.203133	group_388	0.0689424	group_396	0.0112423	group_644	0.223699	group_644	-0.145086	group_644	0.470263	group_644	-0.28092	group_644	0.155781	group_644	-0.504494	group_644	0.00728544	group_644	-0.0355036	group_644	0.860445	group_644	0.132326	group_644	0.510567
group_397	-0.220296	group_397	0.0481319	group_397	0.347351	ndhC	0.261768	group_397	-0.203133	group_389	0.0689424	group_397	0.0112423	group_645	0.173358	group_645	-0.289418	group_645	0.143126	group_645	-0.389773	group_645	0.0444555	group_645	-0.458131	group_645	0.0162548	group_645	-0.10351	group_645	0.607402	group_645	0.0241121	group_645	0.904975
group_398	-0.220296	group_398	0.0481319	group_398	0.347351	ndhK1	0.261768	group_398	-0.203133	group_390	0.0689424	group_398	0.0112423	group_646	0.526363	group_646	0.0156207	group_646	0.93836	group_646	0.0216363	group_646	0.914695	group_646	-0.148034	group_646	0.461192	group_646	0.181568	group_646	0.364735	group_646	0.148034	group_646	0.461192
group_399	-0.220296	group_399	0.0481319	group_399	0.347351	group_66	0.261768	group_399	-0.203133	group_391	0.0689424	group_399	0.0112423	group_647	0.526363	group_647	0.43738	group_647	0.0225219	group_647	0.255308	group_647	0.198697	group_647	0.232625	group_647	0.242942	group_647	0.181568	group_647	0.364735	group_647	0.148034	group_647	0.461192
group_400	-0.220296	group_400	0.0481319	group_400	0.347351	group_53	0.268738	group_400	-0.203133	group_392	0.0689424	group_400	0.0112423	group_648	0.856887	group_648	-0.300699	group_648	0.127493	group_648	-0.212036	group_648	0.288341	group_648	-0.338364	group_648	0.0842872	group_648	-0.363137	group_648	0.0626374	group_648	0.148034	group_648	0.461192
group_406	-0.220296	group_406	0.0481319	group_406	0.347351	group_650	0.275205	group_406	-0.203133	group_393	0.0689424	group_406	0.0112423	group_649	0.526363	group_649	0.0156207	group_649	0.93836	group_649	0.0216363	group_649	0.914695	group_649	0.0422955	group_649	0.834083	group_649	0.181568	group_649	0.364735	group_649	0.148034	group_649	0.461192
group_407	-0.220296	group_407	0.0481319	group_407	0.347351	group_104	0.305215	group_407	-0.203133	group_394	0.0689424	group_407	0.0112423	group_65	0.856887	group_65	0.2265	group_65	0.255923	group_65	0.0216363	group_65	0.914695	group_65	0.0422955	group_65	0.834083	group_65	-0.0907841	group_65	0.652466	group_65	-0.13746	group_65	0.49415
queG_1	-0.220296	queG_1	0.0481319	queG_1	0.347351	group_185	0.305215	queG_1	-0.203133	group_395	0.0689424	queG_1	0.0112423	group_650	0.794724	group_650	-0.0535052	group_650	0.790967	group_650	-0.137299	group_650	0.494662	group_650	-0.0762493	group_650	0.705426	group_650	0.261861	group_650	0.187019	group_650	0.213498	group_650	0.284951
clpE_2	-0.220296	clpE_2	0.0481319	clpE_2	0.347351	group_186	0.305215	clpE_2	-0.203133	group_396	0.0689424	clpE_2	0.0112423	group_66	0.856887	group_66	0.121061	group_66	0.547506	group_66	0.255308	group_66	0.198697	group_66	0.0422955	group_66	0.834083	group_66	-0.0907841	group_66	0.652466	group_66	-0.13746	group_66	0.49415
group_22	0.196965	group_22	0.0779947	group_22	-0.0864741	group_188	0.305215	group_22	-0.151905	group_397	0.0689424	group_22	0.266872	group_67	0.526363	group_67	-0.195259	group_67	0.329053	group_67	0.138472	group_67	0.490945	group_67	0.232625	group_67	0.242942	group_67	0.181568	group_67	0.364735	group_67	0.148034	group_67	0.461192
group_252	-0.225711	group_252	0.0427599	group_252	0.378796	clpP_3	0.305215	group_252	-0.23153	group_398	0.0689424	group_252	0.0953116	group_7	0.0993943	group_7	0.0516839	group_7	0.797935	group_7	0.168231	group_7	0.401586	group_7	0.139942	group_7	0.486309	group_7	0.037547	group_7	0.852497	group_7	0.0174928	group_7	0.930989
group_351	0.257585	group_351	0.0202568	group_351	-0.28217	group_190	0.305215	group_351	0.603156	group_399	0.0689424	group_351	-0.0762493	group_71	0.443209	group_71	0.471304	group_71	0.0130811	group_71	0.630351	group_71	0.000424718	group_71	0.544589	group_71	0.00331401	group_71	0.139573	group_71	0.487473	group_71	-0.0325128	group_71	0.872102
group_402	-0.225711	group_402	0.0427599	group_402	0.378796	group_191	0.305215	group_402	-0.23153	group_400	0.0689424	group_402	0.0953116	group_72	0.173358	group_72	0.289418	group_72	0.143126	group_72	0.389773	group_72	0.0444555	group_72	0.458131	group_72	0.0162548	group_72	0.10351	group_72	0.607402	group_72	-0.0241121	group_72	0.904975
group_403	-0.225711	group_403	0.0427599	group_403	0.378796	group_192	0.305215	group_403	-0.23153	group_406	0.0689424	group_403	0.0953116	group_73	0.443209	group_73	-0.471304	group_73	0.0130811	group_73	-0.630351	group_73	0.000424718	group_73	-0.544589	group_73	0.00331401	group_73	-0.139573	group_73	0.487473	group_73	0.0325128	group_73	0.872102
lexA_1	-0.225711	lexA_1	0.0427599	lexA_1	0.378796	group_193	0.305215	lexA_1	-0.23153	group_407	0.0689424	lexA_1	0.0953116	group_74	0.173358	group_74	0.289418	group_74	0.143126	group_74	0.389773	group_74	0.0444555	group_74	0.458131	group_74	0.0162548	group_74	0.10351	group_74	0.607402	group_74	-0.0241121	group_74	0.904975
group_405	-0.225711	group_405	0.0427599	group_405	0.378796	group_195	0.305215	group_405	-0.23153	queG_1	0.0689424	group_405	0.0953116	group_76	0.0613835	group_76	0.116605	group_76	0.562447	group_76	0.28295	group_76	0.152688	group_76	0.351696	group_76	0.0720243	group_76	0.0686264	group_76	0.733766	group_76	-0.0279758	group_76	0.889833
group_409	-0.225711	group_409	0.0427599	group_409	0.378796	group_196	0.305215	group_409	-0.23153	clpE_2	0.0689424	group_409	0.0953116	group_77	0.185711	group_77	0.309767	group_77	0.115859	group_77	0.546076	group_77	0.00321265	group_77	0.457496	group_77	0.0164225	group_77	0.109109	group_77	0.587997	group_77	-0.0381246	group_77	0.850253
group_410	-0.225711	group_410	0.0427599	group_410	0.378796	group_408	0.305215	group_410	-0.23153	group_56	0.0736761	group_410	0.0953116	group_78	0.223699	group_78	-0.145086	group_78	0.470263	group_78	-0.28092	group_78	0.155781	group_78	-0.504494	group_78	0.00728544	group_78	-0.0355036	group_78	0.860445	group_78	0.132326	group_78	0.510567
group_51	0.196965	group_51	0.0779947	group_51	-0.0864741	group_106	0.311039	group_51	-0.151905	group_20	0.0823904	group_51	0.266872	group_79	0.0613835	group_79	0.116605	group_79	0.562447	group_79	0.28295	group_79	0.152688	group_79	0.351696	group_79	0.0720243	group_79	0.0686264	group_79	0.733766	group_79	-0.0279758	group_79	0.889833
group_52	0.0149662	group_52	0.894502	group_52	-0.155349	group_646	0.314136	group_52	-0.246518	group_2307	0.0823904	group_52	-0.0762493	group_80	0.622312	group_80	0.388496	group_80	0.045219	group_80	0.418691	group_80	0.0297337	group_80	0.057639	group_80	0.77521	group_80	0.123718	group_80	0.538682	group_80	0.115278	group_80	0.566934
group_53	-0.111198	group_53	0.323006	group_53	-0.124341	group_65	0.318937	group_53	-0.160908	group_411	0.0823904	group_53	0.266872	group_82	0.173358	group_82	0.289418	group_82	0.143126	group_82	0.389773	group_82	0.0444555	group_82	0.458131	group_82	0.0162548	group_82	0.10351	group_82	0.607402	group_82	-0.0241121	group_82	0.904975
group_56	-0.0891421	group_56	0.428718	group_56	-0.218515	group_102	0.329023	group_56	-0.199832	group_67	0.115276	group_56	0.266872	group_89	0.622312	group_89	0.388496	group_89	0.045219	group_89	0.418691	group_89	0.0297337	group_89	0.057639	group_89	0.77521	group_89	0.123718	group_89	0.538682	group_89	0.115278	group_89	0.566934
group_101	0.452932	group_101	2.17905e-05	group_101	-0.0117693	group_358	0.329023	group_101	0.499969	group_352	0.124311	group_101	0.00762493	group_9	0.412082	group_9	0.247048	group_9	0.214119	group_9	0.326659	group_9	0.0963063	group_9	0.112423	group_9	0.576638	group_9	0.0482617	group_9	0.811068	group_9	-0.0112423	group_9	0.955617
group_18	-0.31396	group_18	0.00431353	group_18	-0.212383	group_359	0.329023	group_18	-0.106907	group_21	0.124733	group_18	0.213498	group_90	0.526363	group_90	0.0898191	group_90	0.655935	group_90	0.328872	group_90	0.0939406	group_90	-0.0422955	group_90	0.834083	group_90	0.0907841	group_90	0.652466	group_90	0.13746	group_90	0.49415
group_23	-0.098891	group_23	0.379759	group_23	0.378833	group_360	0.329023	group_23	-0.137815	group_298	0.12944	group_23	0.213498	group_91	0.061832	group_91	0.195259	group_91	0.329053	group_91	0.212036	group_91	0.288341	group_91	0.338364	group_91	0.0842872	group_91	0.0907841	group_91	0.652466	group_91	-0.148034	group_91	0.461192
group_24	-0.0467883	group_24	0.678305	group_24	-0.0557673	group_20	0.350838	group_24	-0.329874	lacD_2	0.140084	group_24	-0.198248	group_92	0.515615	group_92	-0.361625	group_92	0.0638205	group_92	-0.467768	group_92	0.0138777	group_92	-0.583496	group_92	0.00139923	group_92	-0.137253	group_92	0.494809	group_92	0.079931	group_92	0.691872
group_2448	-0.0467883	group_2448	0.678305	group_2448	-0.0557673	group_2307	0.350838	group_2448	-0.329874	group_53	0.151278	group_2448	-0.198248	group_93	0.173358	group_93	0.289418	group_93	0.143126	group_93	0.389773	group_93	0.0444555	group_93	0.458131	group_93	0.0162548	group_93	0.10351	group_93	0.607402	group_93	-0.0241121	group_93	0.904975
group_350	0.291546	group_350	0.00827179	group_350	-0.171829	group_411	0.350838	group_350	0.596614	group_646	0.16933	group_350	-0.198248	group_94	0.515615	group_94	-0.361625	group_94	0.0638205	group_94	-0.467768	group_94	0.0138777	group_94	-0.583496	group_94	0.00139923	group_94	-0.137253	group_94	0.494809	group_94	0.079931	group_94	0.691872
ndhB_2	0.452932	ndhB_2	2.17905e-05	ndhB_2	-0.0117693	ulaE	0.358292	ndhB_2	0.499969	group_22	0.175811	ndhB_2	0.00762493	hsdR	0.320887	hsdR	0.00532186	hsdR	0.978982	hsdR	0.0471765	hsdR	0.815244	hsdR	0.403473	hsdR	0.0368916	hsdR	0.123718	hsdR	0.538682	hsdR	0.115278	hsdR	0.566934
group_355	0.452932	group_355	2.17905e-05	group_355	-0.0117693	ulaD	0.358292	group_355	0.499969	group_51	0.175811	group_355	0.00762493	immR	0.173358	immR	-0.289418	immR	0.143126	immR	-0.389773	immR	0.0444555	immR	-0.458131	immR	0.0162548	immR	-0.10351	immR	0.607402	immR	0.0241121	immR	0.904975
rpsG_2	0.452932	rpsG_2	2.17905e-05	rpsG_2	-0.0117693	fruA_4	0.397716	rpsG_2	0.499969	group_262	0.217747	rpsG_2	0.00762493	Int.Tn	0.412082	Int.Tn	-0.247048	Int.Tn	0.214119	Int.Tn	-0.326659	Int.Tn	0.0963063	Int.Tn	-0.112423	Int.Tn	0.576638	Int.Tn	-0.0482617	Int.Tn	0.811068	Int.Tn	0.0112423	Int.Tn	0.955617
group_357	0.452932	group_357	2.17905e-05	group_357	-0.0117693	group_649	0.397716	group_357	0.499969	lacD_1	0.217747	group_357	0.00762493	intS	0.173358	intS	-0.289418	intS	0.143126	intS	-0.389773	intS	0.0444555	intS	-0.458131	intS	0.0162548	intS	-0.10351	intS	0.607402	intS	0.0241121	intS	0.904975
psbA3	0.452932	psbA3	2.17905e-05	psbA3	-0.0117693	group_22	0.442719	psbA3	0.499969	group_5	0.217946	psbA3	0.00762493	ispE_2	0.526363	ispE_2	0.0156207	ispE_2	0.93836	ispE_2	-0.0951997	ispE_2	0.636684	ispE_2	-0.338364	ispE_2	0.0842872	ispE_2	0.181568	ispE_2	0.364735	ispE_2	0.148034	ispE_2	0.461192
group_54	-0.454954	group_54	1.98087e-05	group_54	-0.31793	group_51	0.442719	group_54	-0.257036	group_23	0.219853	group_54	-0.609994	lacC_4	0.173358	lacC_4	-0.289418	lacC_4	0.143126	lacC_4	-0.389773	lacC_4	0.0444555	lacC_4	-0.458131	lacC_4	0.0162548	lacC_4	-0.10351	lacC_4	0.607402	lacC_4	0.0241121	lacC_4	0.904975
group_57	-0.209755	group_57	0.0601874	group_57	-0.26226	group_2447	0.459633	group_57	-0.238238	group_19	0.308771	group_57	-0.198248	lacD_1	0.0799171	lacD_1	0.187621	lacD_1	0.34869	lacD_1	0.136382	lacD_1	0.497576	lacD_1	0.251974	lacD_1	0.204827	lacD_1	0.0348932	lacD_1	0.862822	lacD_1	-0.0325128	lacD_1	0.872102
group_650	0.136071	group_650	0.225802	group_650	-0.122688	group_205	0.545356	group_650	0.00705544	group_18	0.342144	group_650	0.213498	lacD_2	0.526363	lacD_2	0.121061	lacD_2	0.547506	lacD_2	0.255308	lacD_2	0.198697	lacD_2	0.232625	lacD_2	0.242942	lacD_2	0.181568	lacD_2	0.364735	lacD_2	0.148034	lacD_2	0.461192
group_102	0.478757	group_102	6.15392e-06	group_102	0.109832	group_27	0.573771	group_102	0.289404	group_647	0.370499	group_102	0.148034	lacX_2	0.173358	lacX_2	0.289418	lacX_2	0.143126	lacX_2	0.389773	lacX_2	0.0444555	lacX_2	0.458131	lacX_2	0.0162548	lacX_2	0.10351	lacX_2	0.607402	lacX_2	-0.0241121	lacX_2	0.904975
fruA_4	-0.0857663	fruA_4	0.446476	fruA_4	0.0952338	group_647	0.599172	fruA_4	-0.204611	group_17	0.441691	fruA_4	0.148034	lexA	0.0613835	lexA	0.116605	lexA	0.562447	lexA	0.28295	lexA	0.152688	lexA	0.351696	lexA	0.0720243	lexA	0.0686264	lexA	0.733766	lexA	-0.0279758	lexA	0.889833
group_17	0.127647	group_17	0.256116	group_17	0.017456	group_24	0.62096	group_17	-0.0866683	group_59	0.441691	group_17	0.148034	lexA_1	0.185711	lexA_1	-0.225285	lexA_1	0.258551	lexA_1	-0.171624	lexA_1	0.392019	lexA_1	-0.152499	lexA_1	0.447632	lexA_1	4.16e-21	lexA_1	1	lexA_1	0.0953116	lexA_1	0.636286
group_19	-0.31176	group_19	0.00460831	group_19	-0.259802	group_2448	0.62096	group_19	-0.114497	group_648	0.441691	group_19	-0.422955	ltrA	0.173358	ltrA	0.289418	ltrA	0.143126	ltrA	0.389773	ltrA	0.0444555	ltrA	0.458131	ltrA	0.0162548	ltrA	0.10351	ltrA	0.607402	ltrA	-0.0241121	ltrA	0.904975
group_20	-0.238468	group_20	0.0320419	group_20	0.105008	group_298	0.646593	group_20	-0.194174	ispE_2	0.491453	group_20	-0.13746	ndhB_2	0.744914	ndhB_2	0.25063	ndhB_2	0.207335	ndhB_2	0.283959	ndhB_2	0.151167	ndhB_2	0.198248	ndhB_2	0.321555	ndhB_2	0.0654654	ndhB_2	0.74562	ndhB_2	0.00762493	ndhB_2	0.96989
group_2307	-0.238468	group_2307	0.0320419	group_2307	0.105008	lacD_2	0.689667	group_2307	-0.194174	group_91	0.516341	group_2307	-0.13746	ndhC	0.856887	ndhC	0.121061	ndhC	0.547506	ndhC	0.255308	ndhC	0.198697	ndhC	0.0422955	ndhC	0.834083	ndhC	-0.0907841	ndhC	0.652466	ndhC	-0.13746	ndhC	0.49415
group_3	-0.321571	group_3	0.00341881	group_3	-0.193531	group_182	0.704143	group_3	-0.235242	ulaE	0.530418	group_3	0.148034	ndhK1	0.856887	ndhK1	0.121061	ndhK1	0.547506	ndhK1	0.255308	ndhK1	0.198697	ndhK1	0.0422955	ndhK1	0.834083	ndhK1	-0.0907841	ndhK1	0.652466	ndhK1	-0.13746	ndhK1	0.49415
graR_1	0.0243453	graR_1	0.829195	graR_1	-0.198747	group_197	0.704143	graR_1	0.00756319	ulaD	0.530418	graR_1	0.148034	nisB_2	0.412082	nisB_2	-0.247048	nisB_2	0.214119	nisB_2	-0.326659	nisB_2	0.0963063	nisB_2	-0.112423	nisB_2	0.576638	nisB_2	-0.0482617	nisB_2	0.811068	nisB_2	0.0112423	nisB_2	0.955617
group_358	0.478757	group_358	6.15392e-06	group_358	0.109832	group_199	0.758746	group_358	0.289404	group_10	0.563884	group_358	0.148034	nisC	0.173358	nisC	0.289418	nisC	0.143126	nisC	0.389773	nisC	0.0444555	nisC	0.458131	nisC	0.0162548	nisC	0.10351	nisC	0.607402	nisC	-0.0241121	nisC	0.904975
group_359	0.478757	group_359	6.15392e-06	group_359	0.109832	group_200	0.758746	group_359	0.289404	group_106	0.605593	group_359	0.148034	nisI	0.173358	nisI	0.289418	nisI	0.143126	nisI	0.389773	nisI	0.0444555	nisI	0.458131	nisI	0.0162548	nisI	0.10351	nisI	0.607402	nisI	-0.0241121	nisI	0.904975
group_360	0.478757	group_360	6.15392e-06	group_360	0.109832	group_201	0.758746	group_360	0.289404	group_104	0.876074	group_360	0.148034	nsuA	0.412082	nsuA	-0.247048	nsuA	0.214119	nsuA	-0.326659	nsuA	0.0963063	nsuA	-0.112423	nsuA	0.576638	nsuA	-0.0482617	nsuA	0.811068	nsuA	0.0112423	nsuA	0.955617
group_362	0.149346	group_362	0.183288	group_362	-0.126153	group_77	0.758746	group_362	0.403928	group_185	0.876074	group_362	-0.13746	pepX_1	0.526363	pepX_1	-0.195259	pepX_1	0.329053	pepX_1	-0.212036	pepX_1	0.288341	pepX_1	-0.148034	pepX_1	0.461192	pepX_1	0.181568	pepX_1	0.364735	pepX_1	0.148034	pepX_1	0.461192
group_363	0.149346	group_363	0.183288	group_363	-0.126153	pepX_1	0.799854	group_363	0.403928	group_186	0.876074	group_363	-0.13746	pezA	0.173358	pezA	0.289418	pezA	0.143126	pezA	0.389773	pezA	0.0444555	pezA	0.458131	pezA	0.0162548	pezA	0.10351	pezA	0.607402	pezA	-0.0241121	pezA	0.904975
group_364	0.149346	group_364	0.183288	group_364	-0.126153	group_165	0.820918	group_364	0.403928	group_188	0.876074	group_364	-0.13746	pezT	0.173358	pezT	0.289418	pezT	0.143126	pezT	0.389773	pezT	0.0444555	pezT	0.458131	pezT	0.0162548	pezT	0.10351	pezT	0.607402	pezT	-0.0241121	pezT	0.904975
group_365	0.149346	group_365	0.183288	group_365	-0.126153	group_207	0.820918	group_365	0.403928	clpP_3	0.876074	group_365	-0.13746	psbA3	0.744914	psbA3	0.25063	psbA3	0.207335	psbA3	0.283959	psbA3	0.151167	psbA3	0.198248	psbA3	0.321555	psbA3	0.0654654	psbA3	0.74562	psbA3	0.00762493	psbA3	0.96989
ndhC	0.149346	ndhC	0.183288	ndhC	-0.126153	group_153	0.83822	ndhC	0.403928	group_190	0.876074	ndhC	-0.13746	qseB	0.173358	qseB	-0.289418	qseB	0.143126	qseB	-0.389773	qseB	0.0444555	qseB	-0.458131	qseB	0.0162548	qseB	-0.10351	qseB	0.607402	qseB	0.0241121	qseB	0.904975
ndhK1	0.149346	ndhK1	0.183288	ndhK1	-0.126153	group_155	0.83822	ndhK1	0.403928	group_191	0.876074	ndhK1	-0.13746	queG_1	0.412082	queG_1	-0.247048	queG_1	0.214119	queG_1	-0.326659	queG_1	0.0963063	queG_1	-0.112423	queG_1	0.576638	queG_1	-0.0482617	queG_1	0.811068	queG_1	0.0112423	queG_1	0.955617
group_4	-0.319147	group_4	0.00368388	group_4	-0.181088	group_300	0.83822	group_4	-0.241948	group_192	0.876074	group_4	-0.422955	radD	0.0613835	radD	0.116605	radD	0.562447	radD	0.28295	radD	0.152688	radD	0.351696	radD	0.0720243	radD	0.0686264	radD	0.733766	radD	-0.0279758	radD	0.889833
group_411	-0.238468	group_411	0.0320419	group_411	0.105008	group_301	0.83822	group_411	-0.194174	group_193	0.876074	group_411	-0.13746	regX3	0.173358	regX3	0.289418	regX3	0.143126	regX3	0.389773	regX3	0.0444555	regX3	0.458131	regX3	0.0162548	regX3	0.10351	regX3	0.607402	regX3	-0.0241121	regX3	0.904975
pepX_1	0.164351	pepX_1	0.142606	pepX_1	0.0286096	group_305	0.83822	pepX_1	0.00222095	group_195	0.876074	pepX_1	0.148034	rpsG_2	0.744914	rpsG_2	0.25063	rpsG_2	0.207335	rpsG_2	0.283959	rpsG_2	0.151167	rpsG_2	0.198248	rpsG_2	0.321555	rpsG_2	0.0654654	rpsG_2	0.74562	rpsG_2	0.00762493	rpsG_2	0.96989
group_50	-0.321571	group_50	0.00341881	group_50	-0.193531	group_306	0.83822	group_50	-0.235242	group_196	0.876074	group_50	0.148034	smc_1	0.173358	smc_1	-0.289418	smc_1	0.143126	smc_1	-0.389773	smc_1	0.0444555	smc_1	-0.458131	smc_1	0.0162548	smc_1	-0.10351	smc_1	0.607402	smc_1	0.0241121	smc_1	0.904975
group_55	-0.319147	group_55	0.00368388	group_55	-0.181088	group_90	0.83822	group_55	-0.241948	group_408	0.876074	group_55	-0.422955	soj	0.443209	soj	0.471304	soj	0.0130811	soj	0.630351	soj	0.000424718	soj	0.544589	soj	0.00331401	soj	0.139573	soj	0.487473	soj	-0.0325128	soj	0.872102
group_59	0.127647	group_59	0.256116	group_59	0.017456	group_17	0.877079	group_59	-0.0866683	graR_1	0.946572	group_59	0.148034	tet.M.	0.412082	tet.M.	-0.247048	tet.M.	0.214119	tet.M.	-0.326659	tet.M.	0.0963063	tet.M.	-0.112423	tet.M.	0.576638	tet.M.	-0.0482617	tet.M.	0.811068	tet.M.	0.0112423	tet.M.	0.955617
group_646	0.0886347	group_646	0.431362	group_646	-0.113242	group_59	0.877079	group_646	-0.154188	group_650	0.950154	group_646	0.148034	tet.O.	0.443209	tet.O.	0.471304	tet.O.	0.0130811	tet.O.	0.630351	tet.O.	0.000424718	tet.O.	0.544589	tet.O.	0.00331401	tet.O.	0.139573	tet.O.	0.487473	tet.O.	-0.0325128	tet.O.	0.872102
group_647	0.0747842	group_647	0.506993	group_647	-0.0592689	group_648	0.877079	group_647	-0.100818	group_153	0.977526	group_647	0.148034	topB	0.173358	topB	-0.289418	topB	0.143126	topB	-0.389773	topB	0.0444555	topB	-0.458131	topB	0.0162548	topB	-0.10351	topB	0.607402	topB	0.0241121	topB	0.904975
group_648	0.127647	group_648	0.256116	group_648	0.017456	group_16	0.913158	group_648	-0.0866683	group_155	0.977526	group_648	0.148034	ulaD	0.856887	ulaD	0.0898191	ulaD	0.655935	ulaD	0.0951997	ulaD	0.636684	ulaD	0.338364	ulaD	0.0842872	ulaD	0.0907841	ulaD	0.652466	ulaD	-0.148034	ulaD	0.461192
group_649	-0.0857663	group_649	0.446476	group_649	0.0952338	group_101	0.916947	group_649	-0.204611	group_300	0.977526	group_649	0.148034	ulaE	0.856887	ulaE	0.0898191	ulaE	0.655935	ulaE	0.0951997	ulaE	0.636684	ulaE	0.338364	ulaE	0.0842872	ulaE	0.0907841	ulaE	0.652466	ulaE	-0.148034	ulaE	0.461192
group_65	0.254956	group_65	0.0216163	group_65	-0.112131	ndhB_2	0.916947	group_65	0.423426	group_301	0.977526	group_65	-0.13746	uvrB_2	0.173358	uvrB_2	-0.289418	uvrB_2	0.143126	uvrB_2	-0.389773	uvrB_2	0.0444555	uvrB_2	-0.458131	uvrB_2	0.0162548	uvrB_2	-0.10351	uvrB_2	0.607402	uvrB_2	0.0241121	uvrB_2	0.904975
group_66	0.149346	group_66	0.183288	group_66	-0.126153	group_355	0.916947	group_66	0.403928	group_305	0.977526	group_66	-0.13746	xerC_2	0.0613835	xerC_2	0.116605	xerC_2	0.562447	xerC_2	0.28295	xerC_2	0.152688	xerC_2	0.351696	xerC_2	0.0720243	xerC_2	0.0686264	xerC_2	0.733766	xerC_2	-0.0279758	xerC_2	0.889833
group_67	0.0243453	group_67	0.829195	group_67	-0.231274	rpsG_2	0.916947	group_67	0.176357	group_306	0.977526	group_67	0.148034	xerC_3	0.173358	xerC_3	-0.289418	xerC_3	0.143126	xerC_3	-0.389773	xerC_3	0.0444555	xerC_3	-0.458131	xerC_3	0.0162548	xerC_3	-0.10351	xerC_3	0.607402	xerC_3	0.0241121	xerC_3	0.904975
lacD_2	0.115066	lacD_2	0.306355	lacD_2	0.0450451	group_357	0.916947	lacD_2	0.165381	group_90	0.977526	lacD_2	0.148034	xerC_4	0.622312	xerC_4	0.388496	xerC_4	0.045219	xerC_4	0.418691	xerC_4	0.0297337	xerC_4	0.057639	xerC_4	0.77521	xerC_4	0.123718	xerC_4	0.538682	xerC_4	0.115278	xerC_4	0.566934
ispE_2	-0.31176	ispE_2	0.00460831	ispE_2	-0.191119	psbA3	0.916947	ispE_2	-0.0775343	pepX_1	0.9843	ispE_2	0.148034	xerD	0.606365	xerD	-0.431901	xerD	0.0244699	xerD	-0.498318	xerD	0.00815896	xerD	-0.554579	xerD	0.00268213	xerD	-0.10351	xerD	0.607402	xerD	0.0843925	xerD	0.675571
